# Supplementary material for: An efficient dehydroxymethylation reaction by a palladium catalyst
Source: Royal Society of Chemistry journal article supplement (doi:10.1039/c2cc36951f), 2012-10-11

## **An efficient dehydroxymethylation reaction by a palladium catalyst<sup>†</sup>**

Atanu Modak, Togati Naveen and Debabrata Maiti\*

Department of Chemistry, Indian Institute of Technology Bombay,  
Powai, Mumbai 400076

**RECEIVED DATE (automatically inserted by publisher);** E-mail:  
dmaiti@chem.iitb.ac.in

*Spectral Data (<sup>1</sup>H NMR, <sup>13</sup>C NMR)*

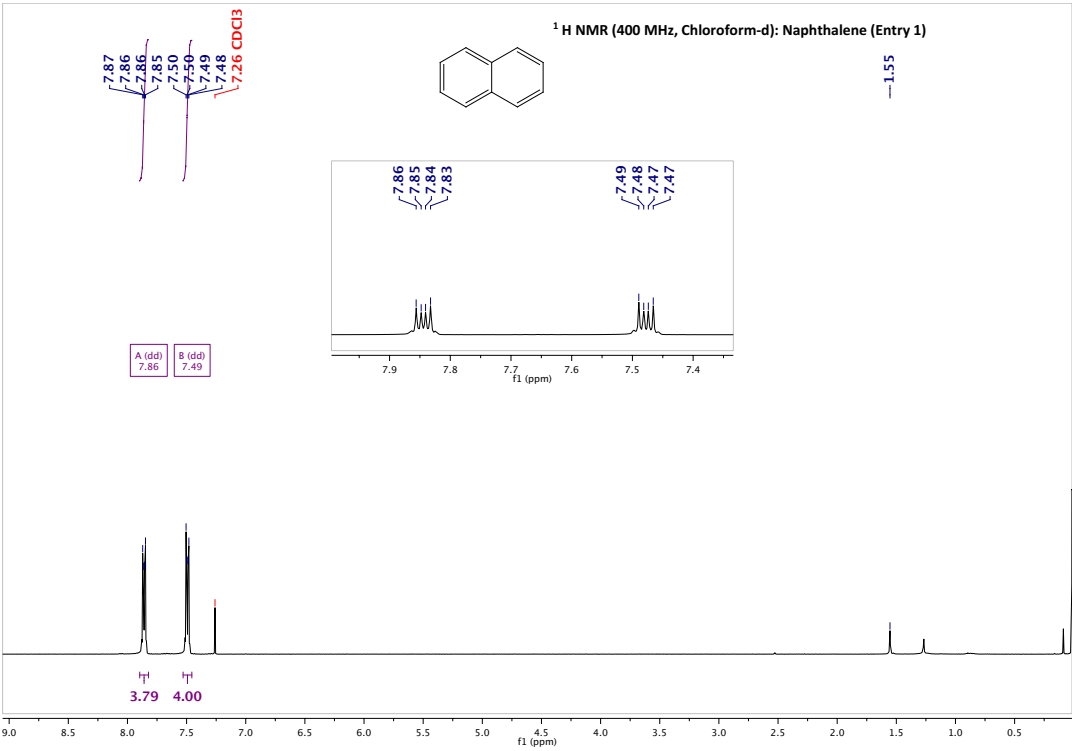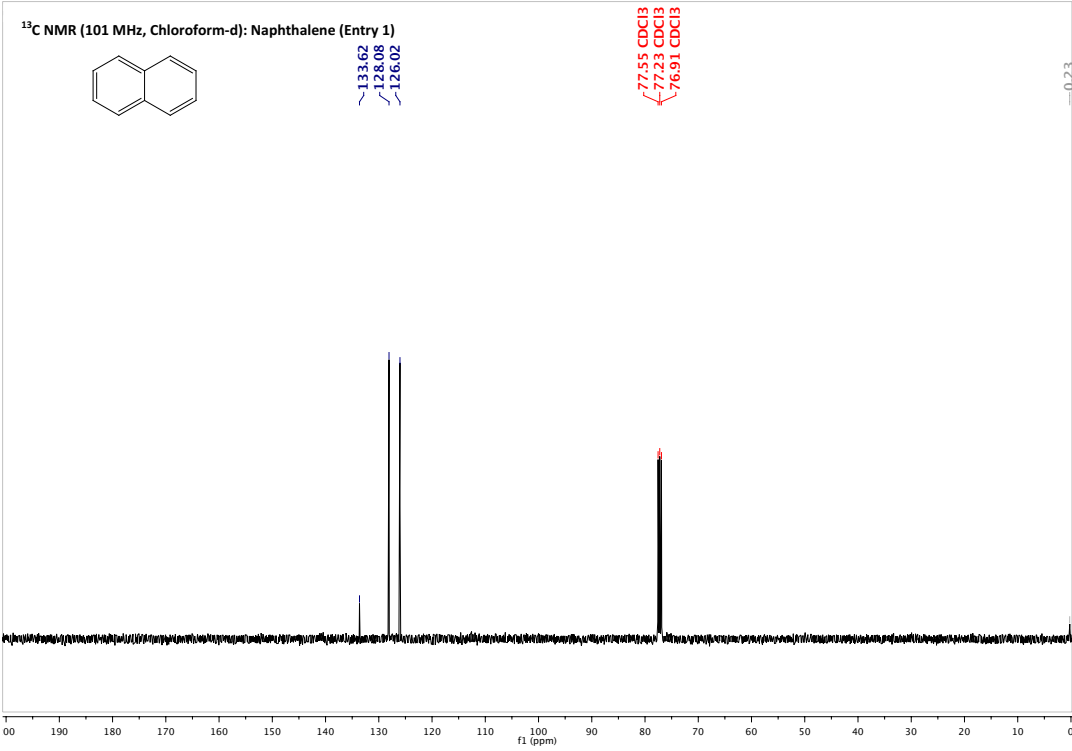

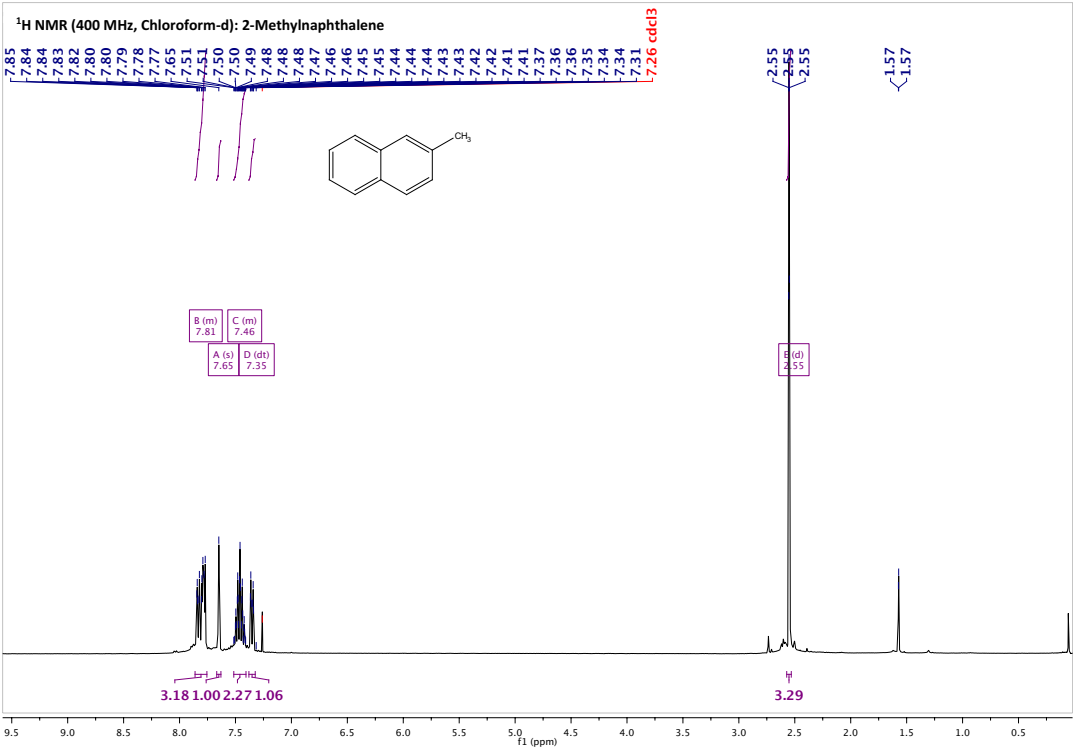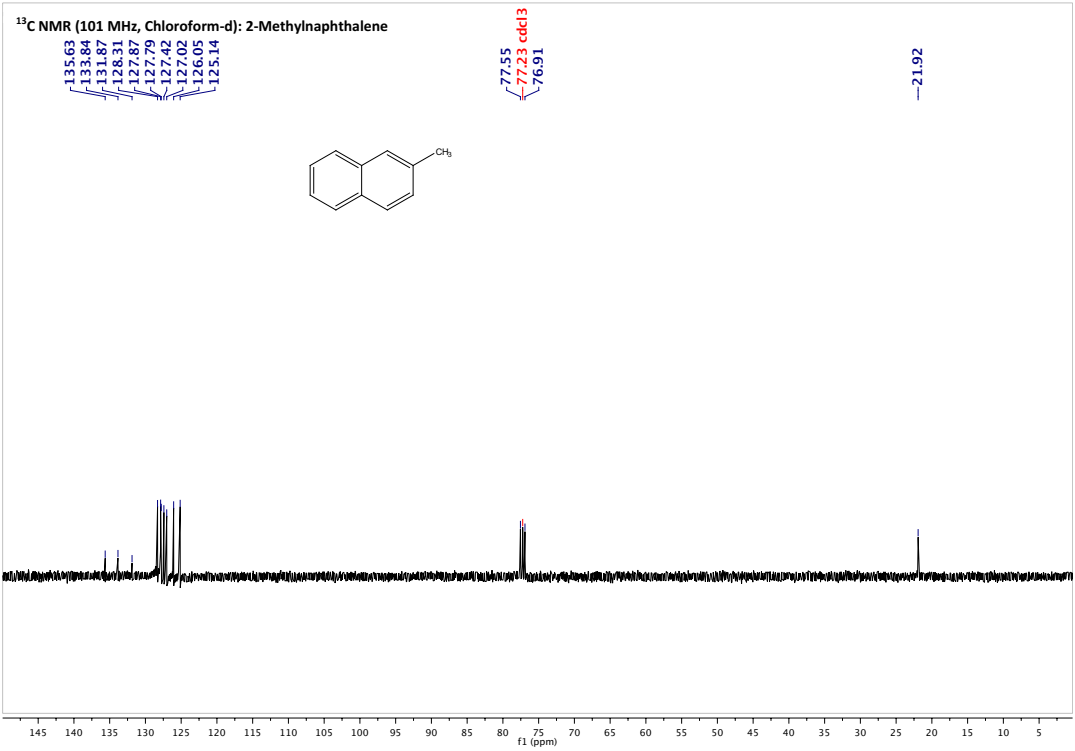

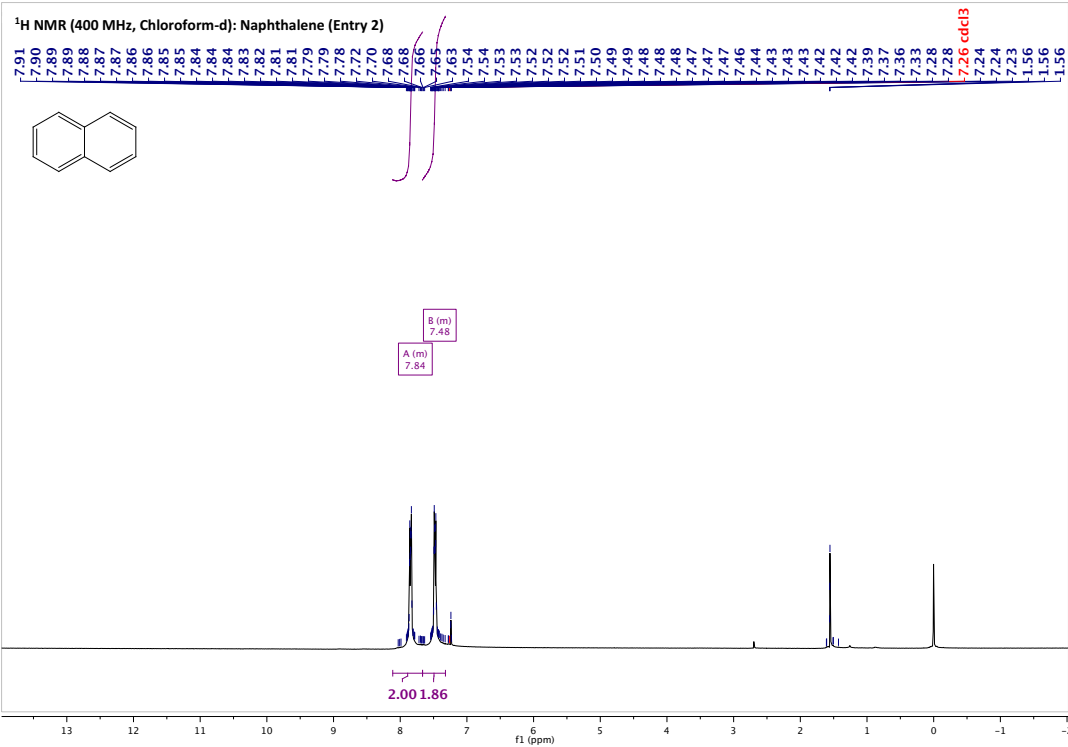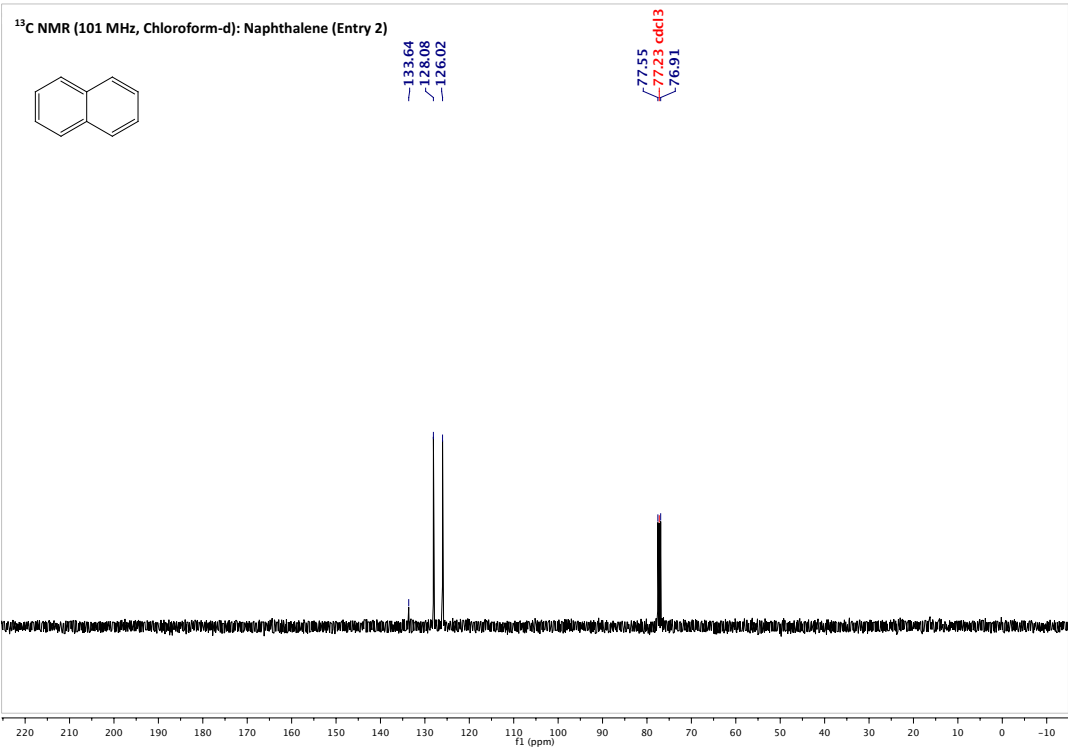



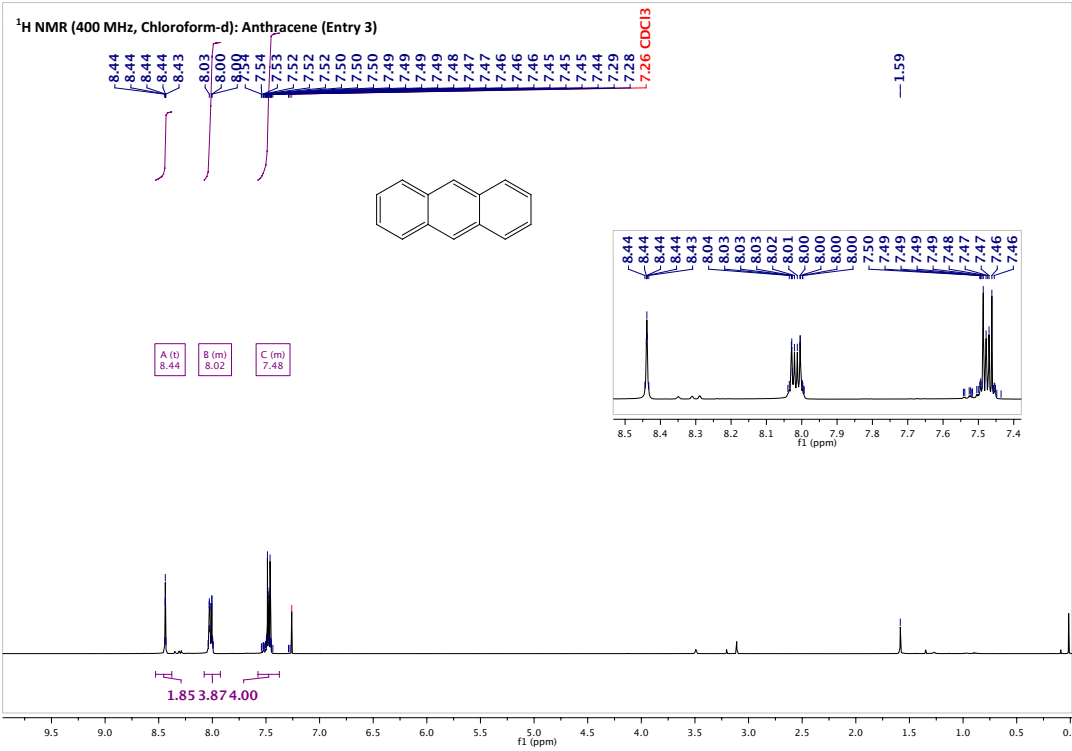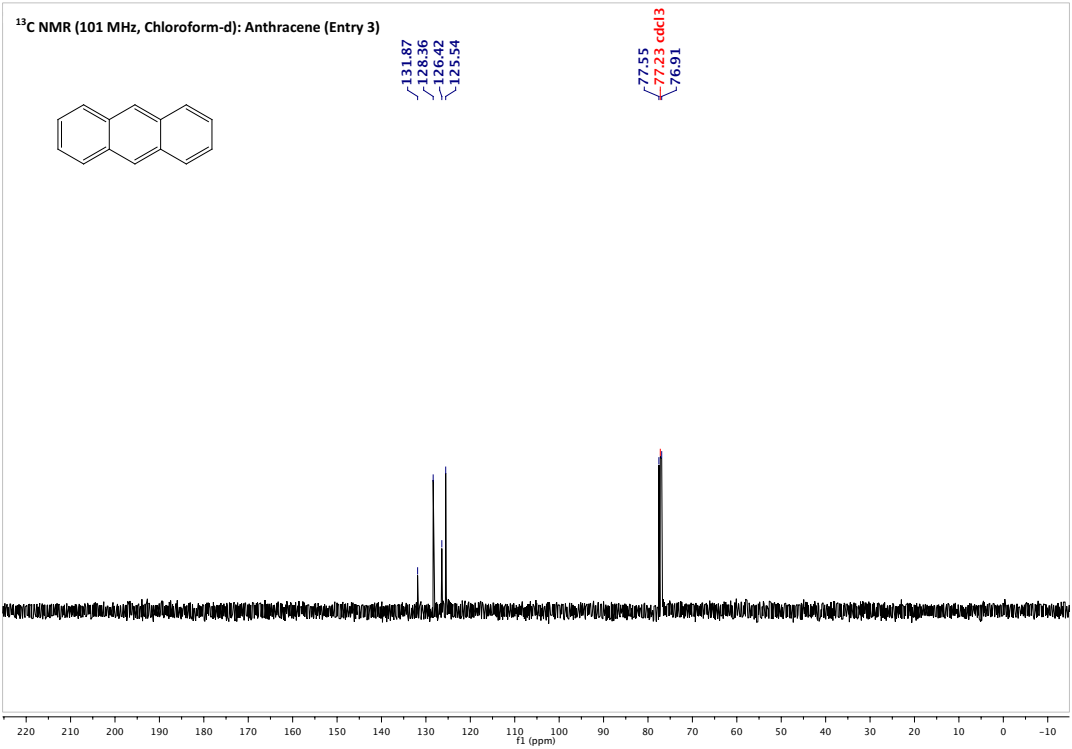

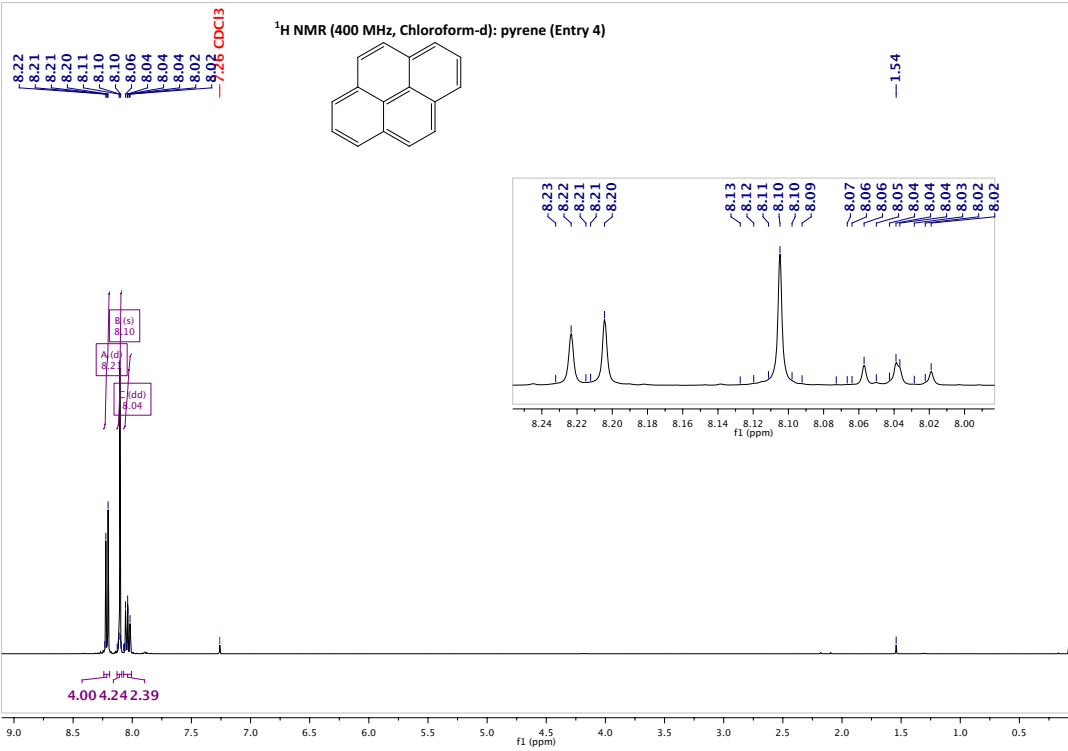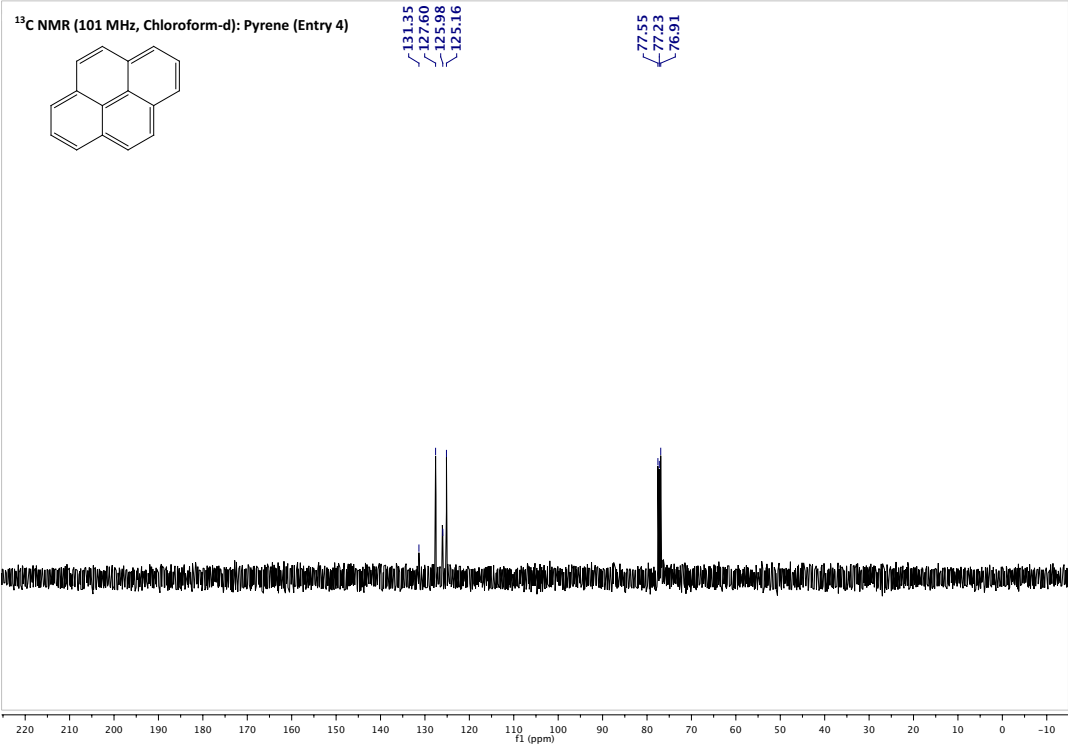

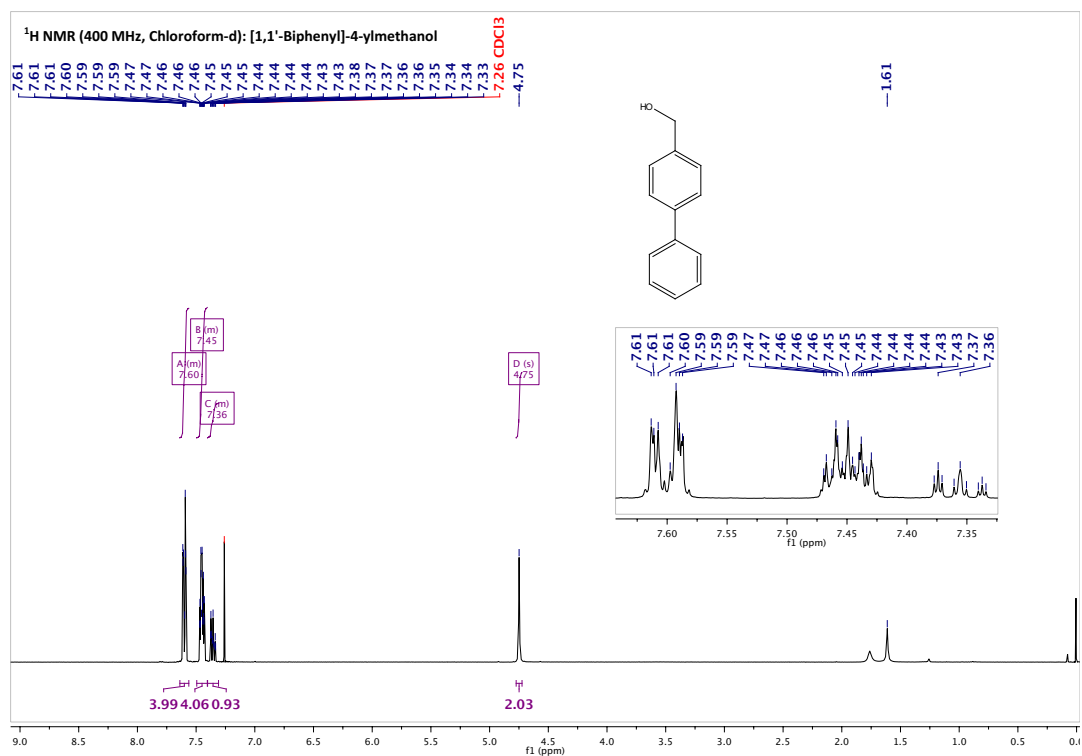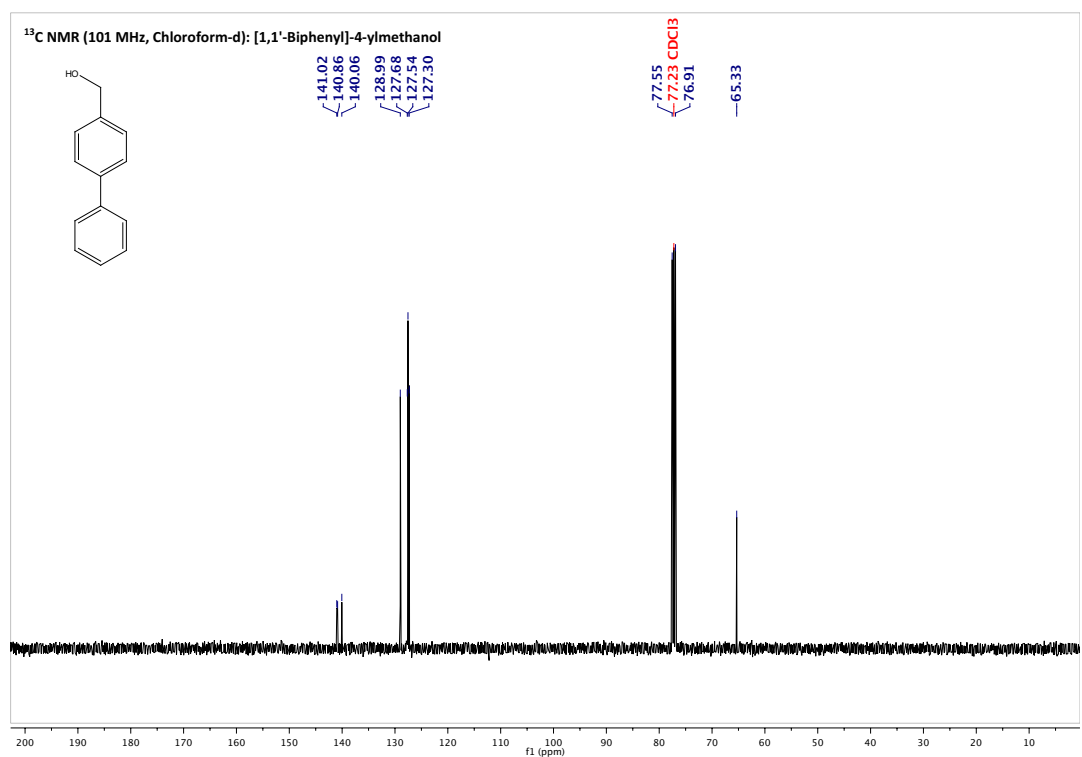

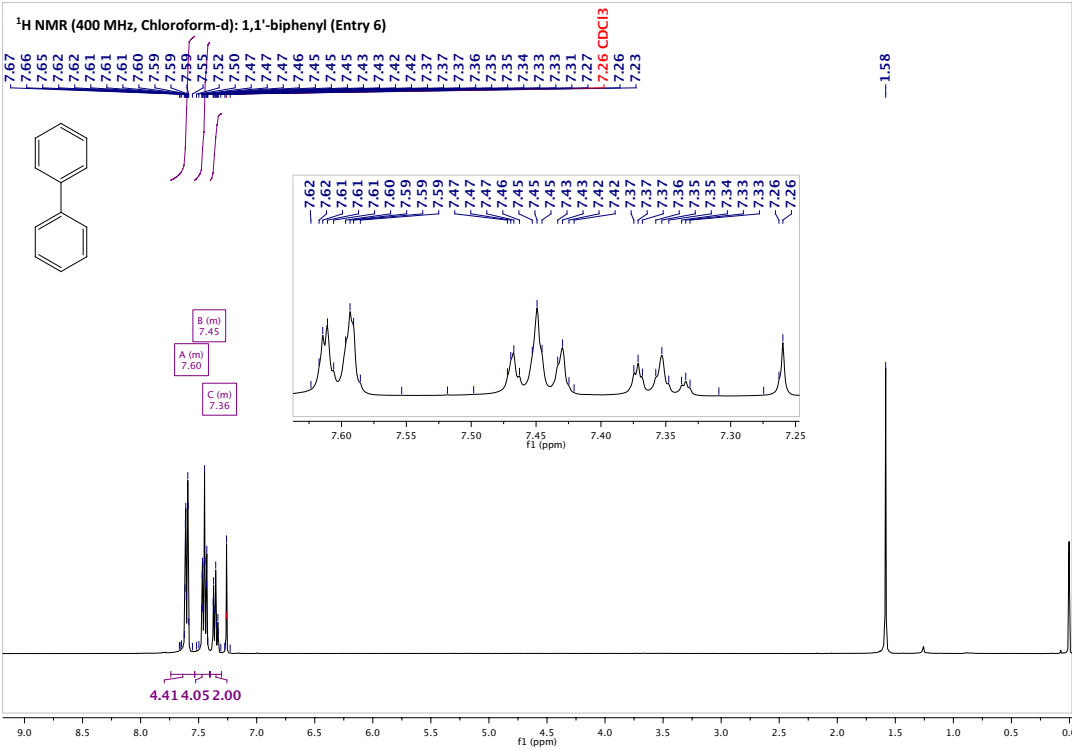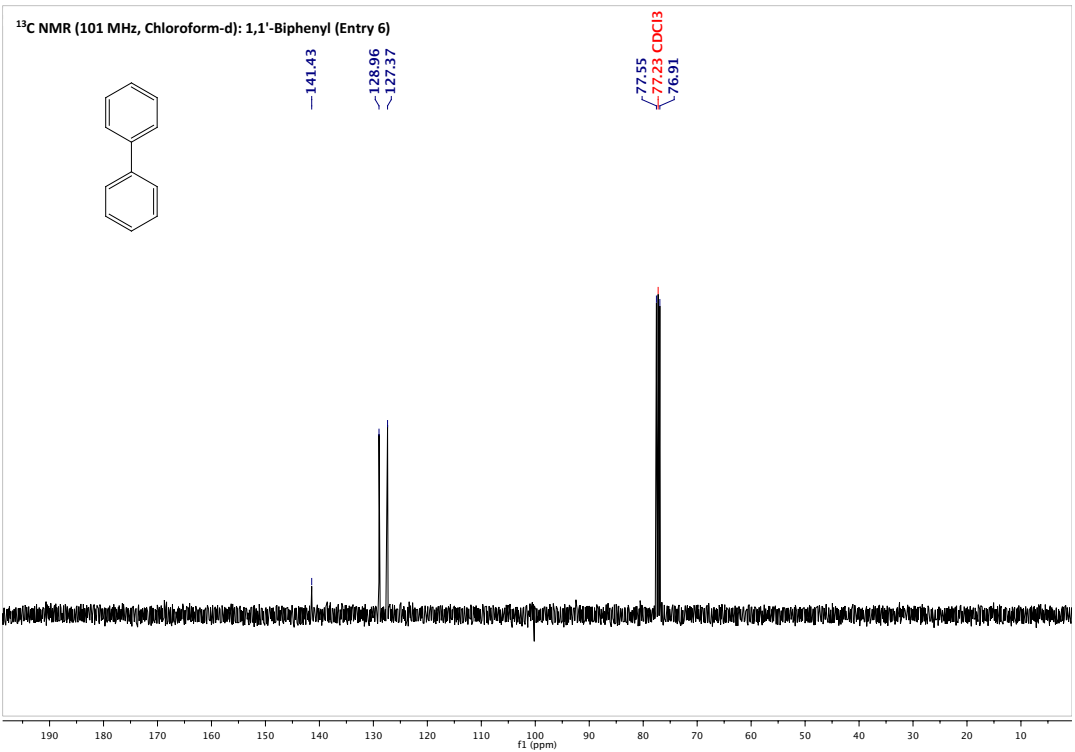

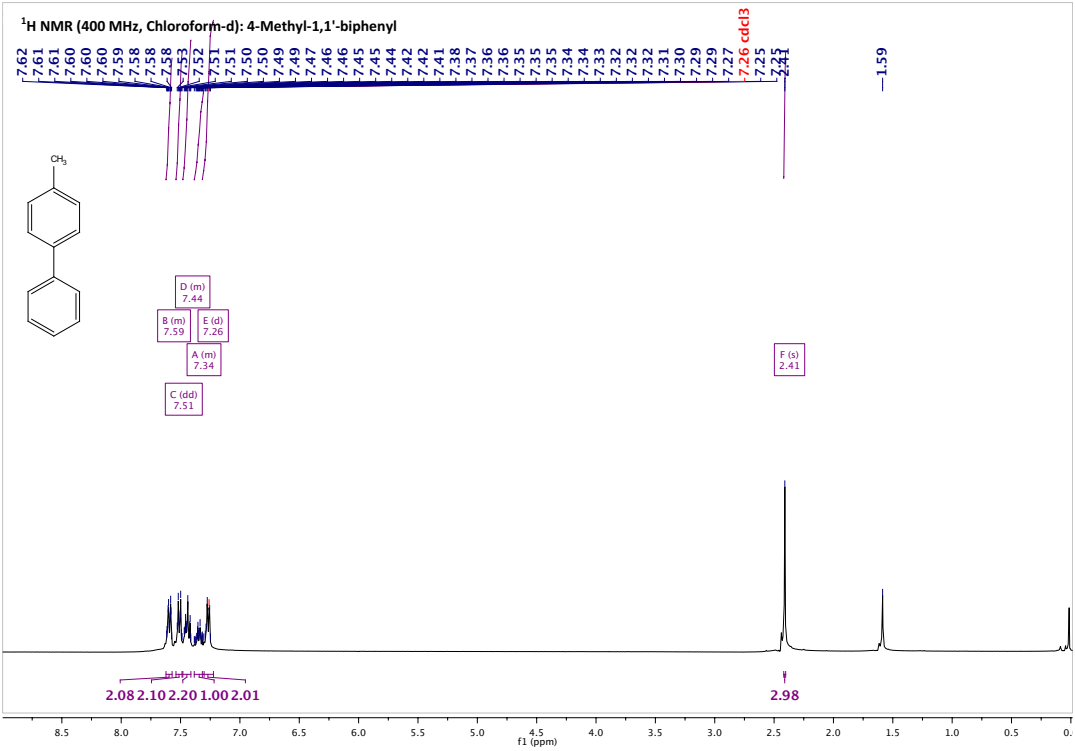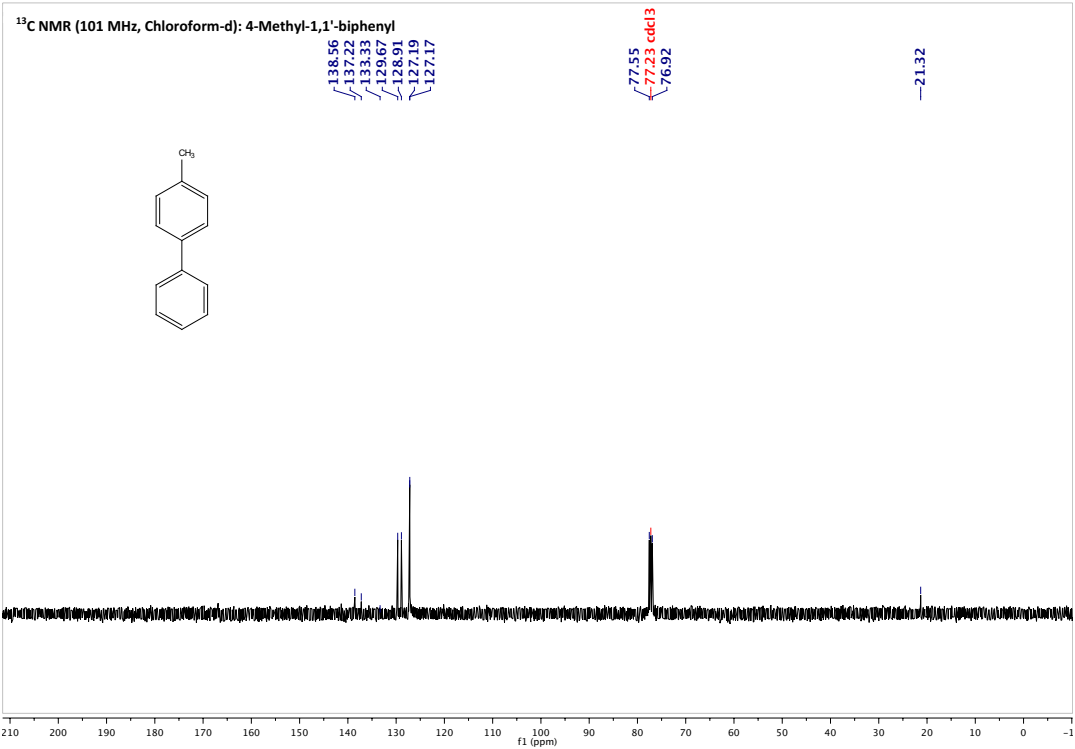

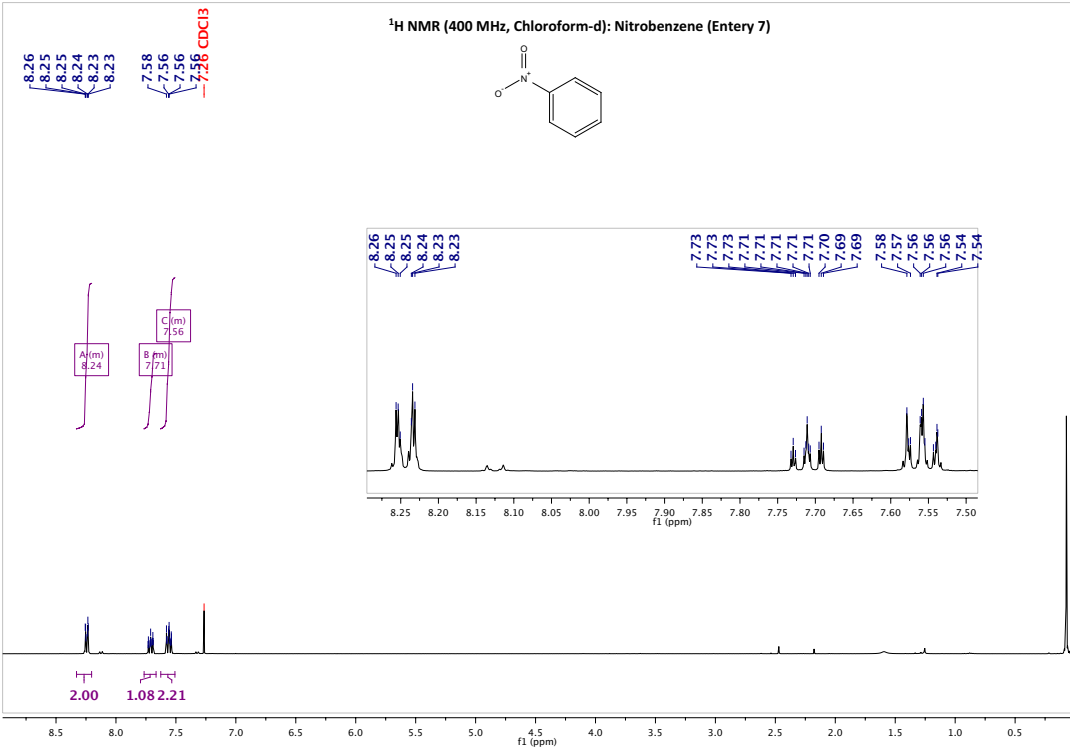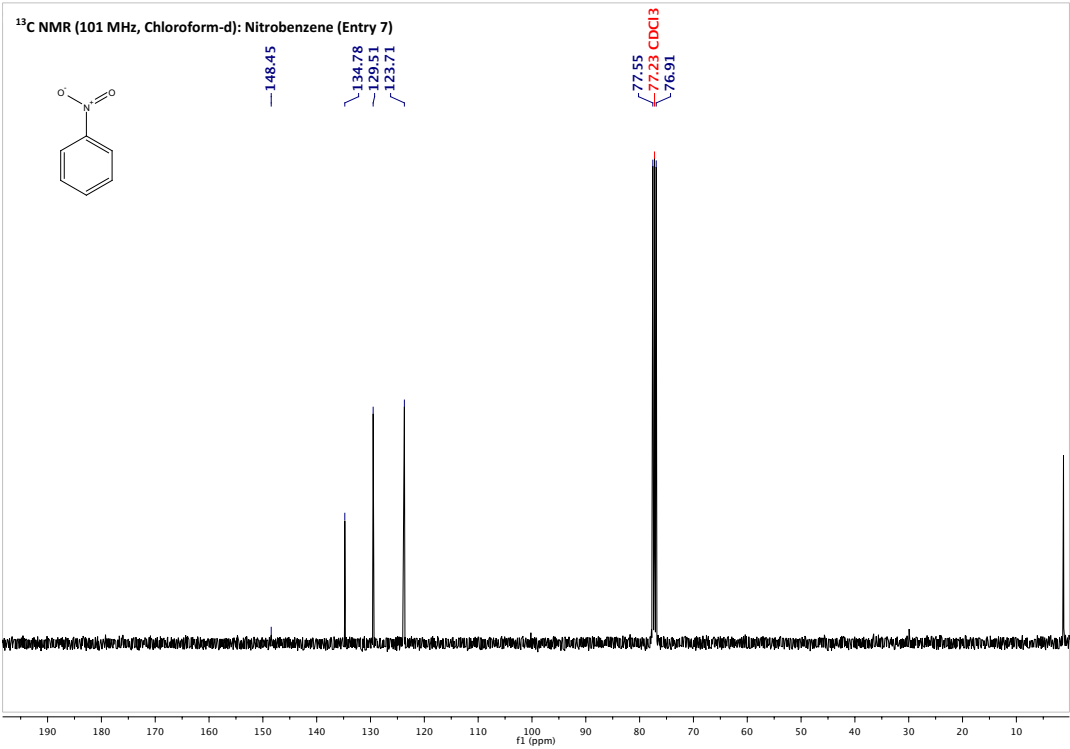

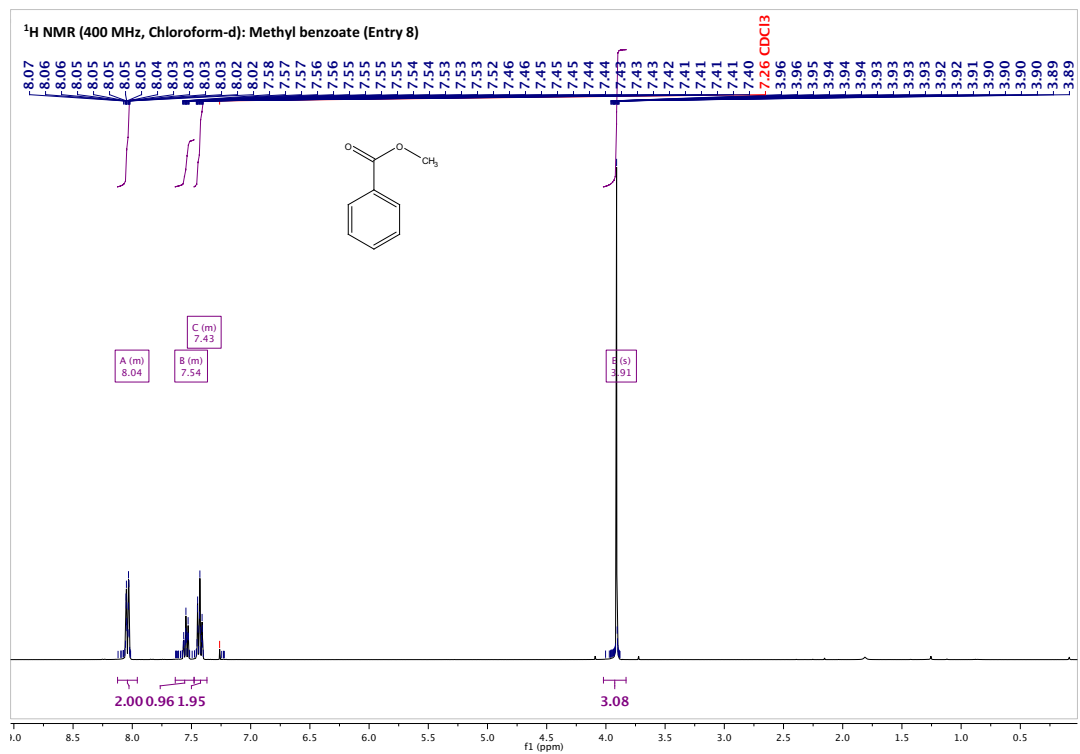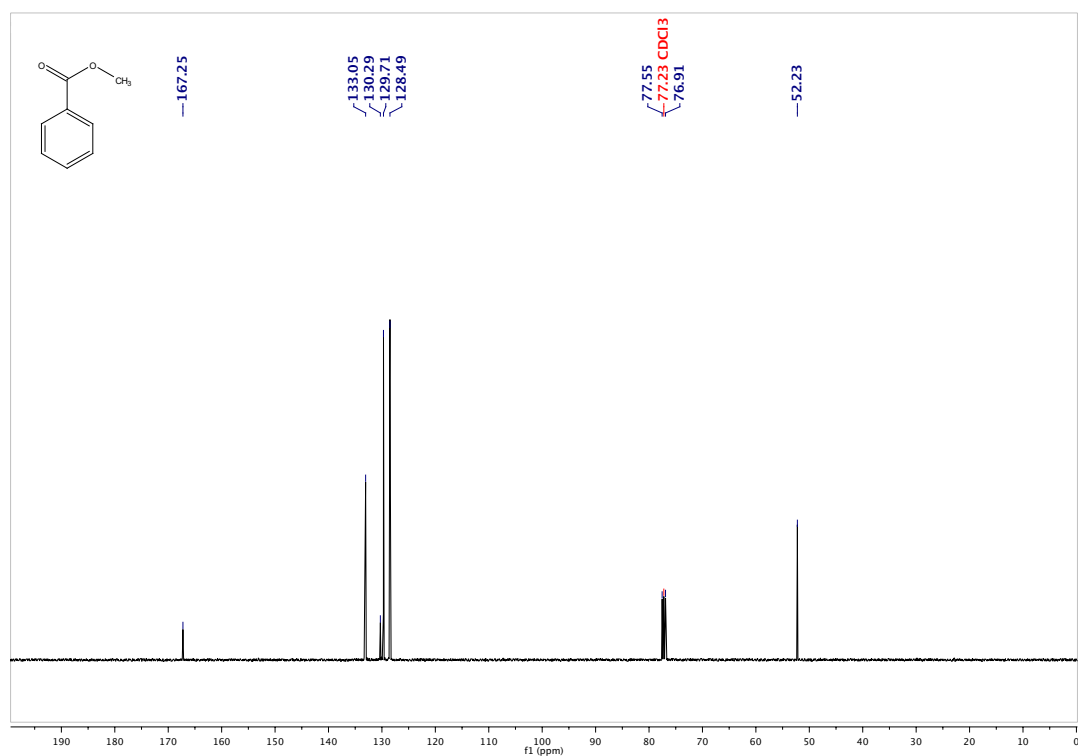

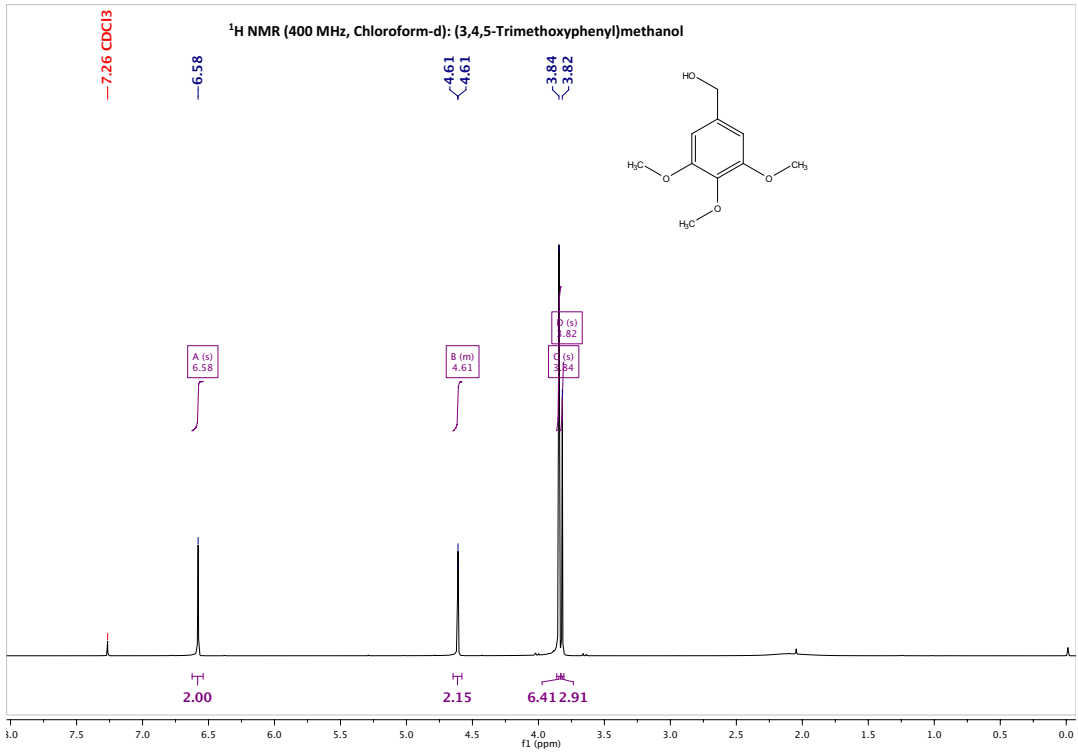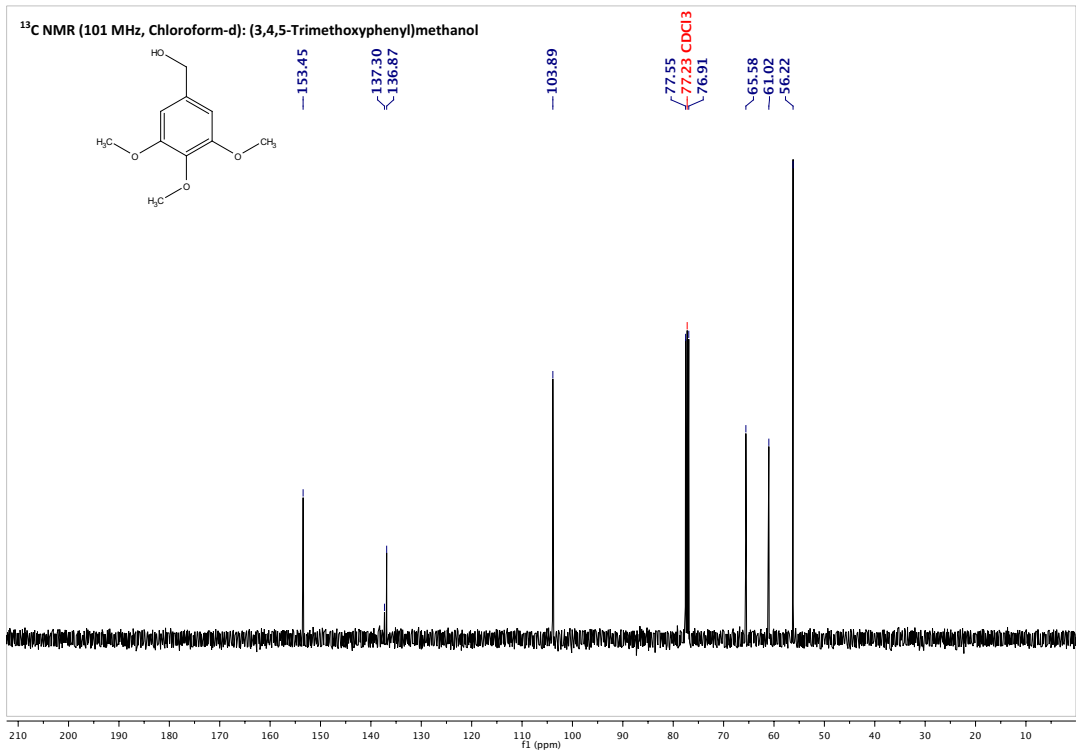



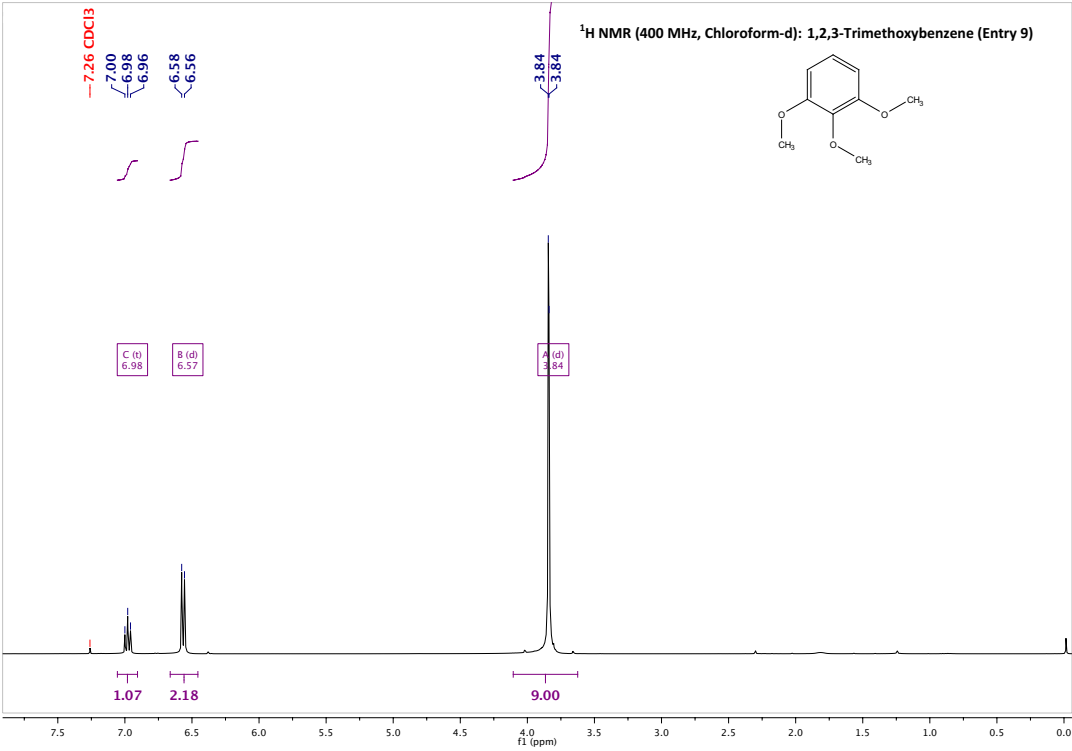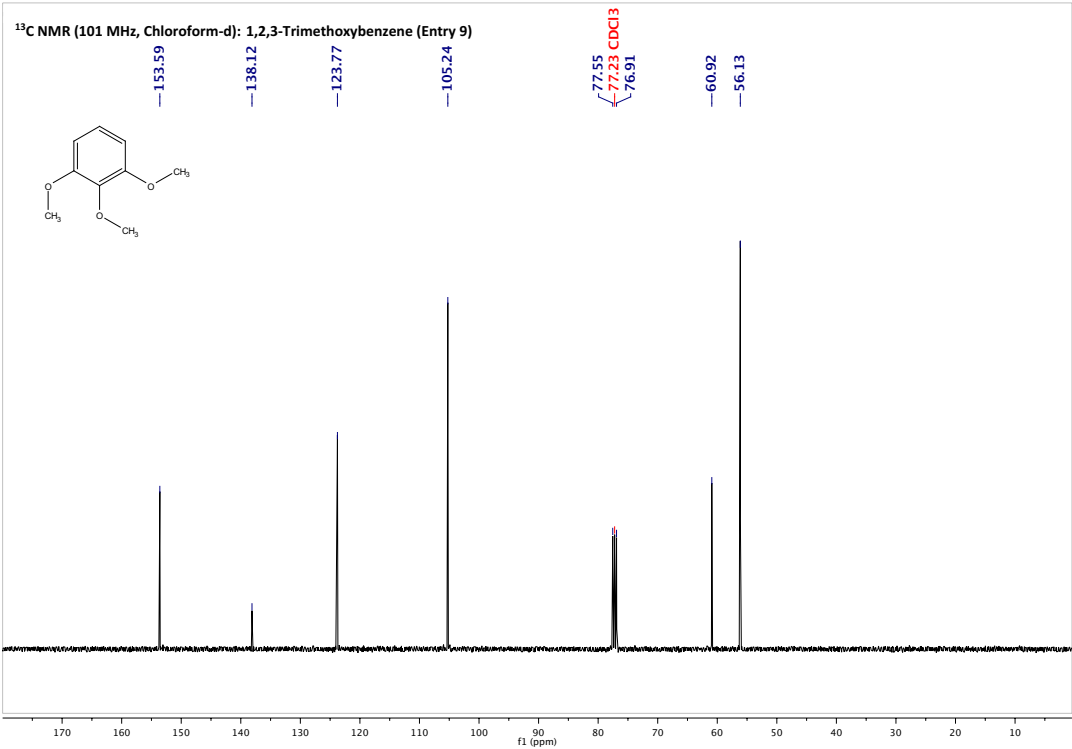

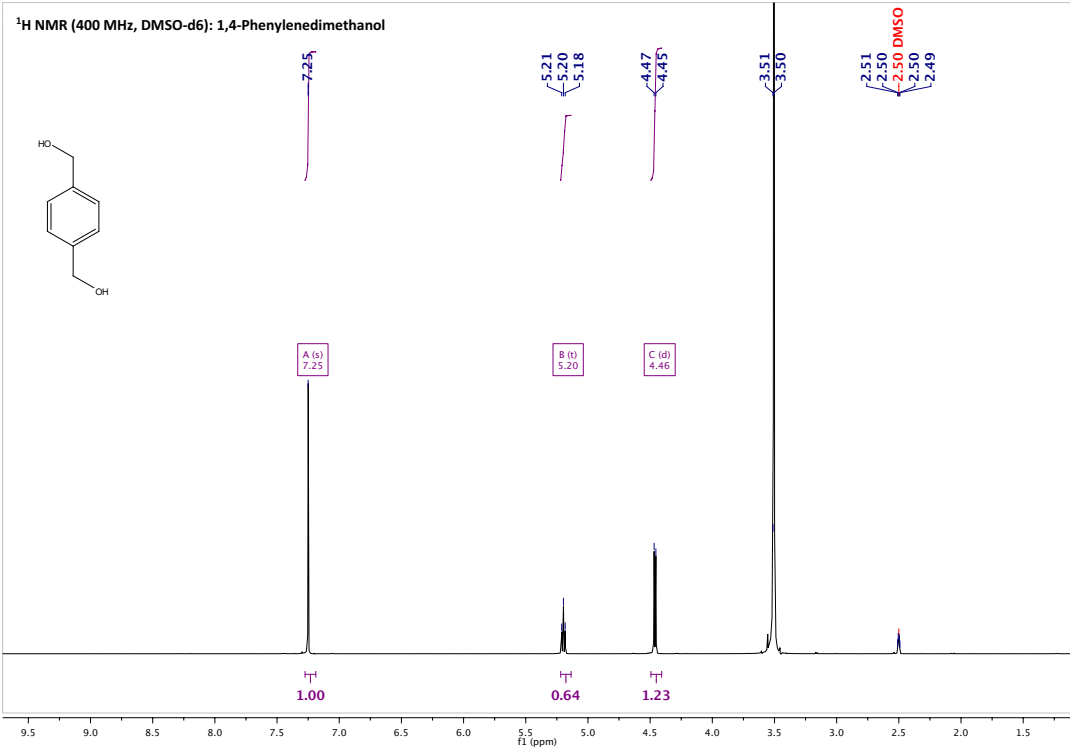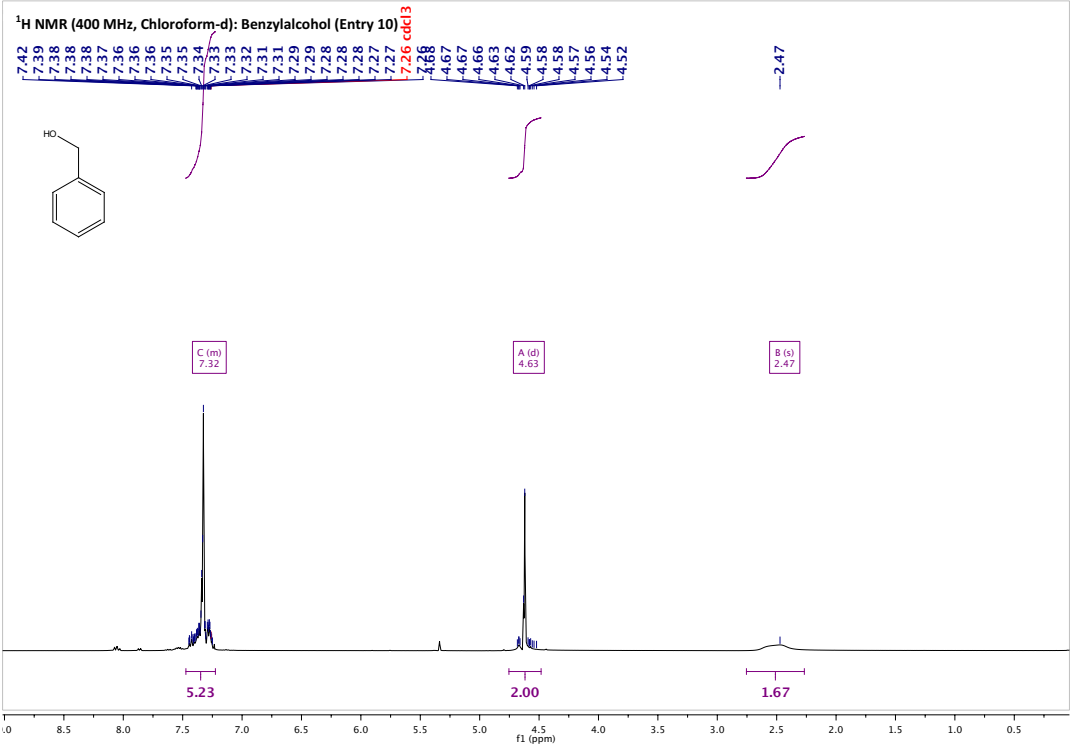

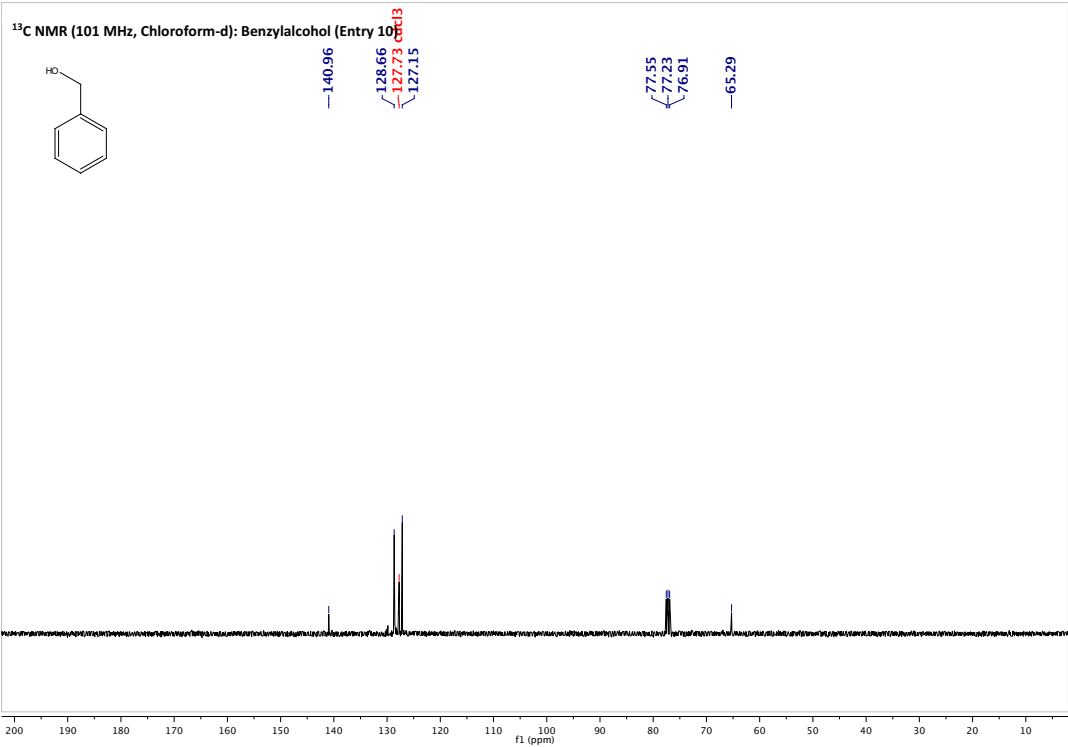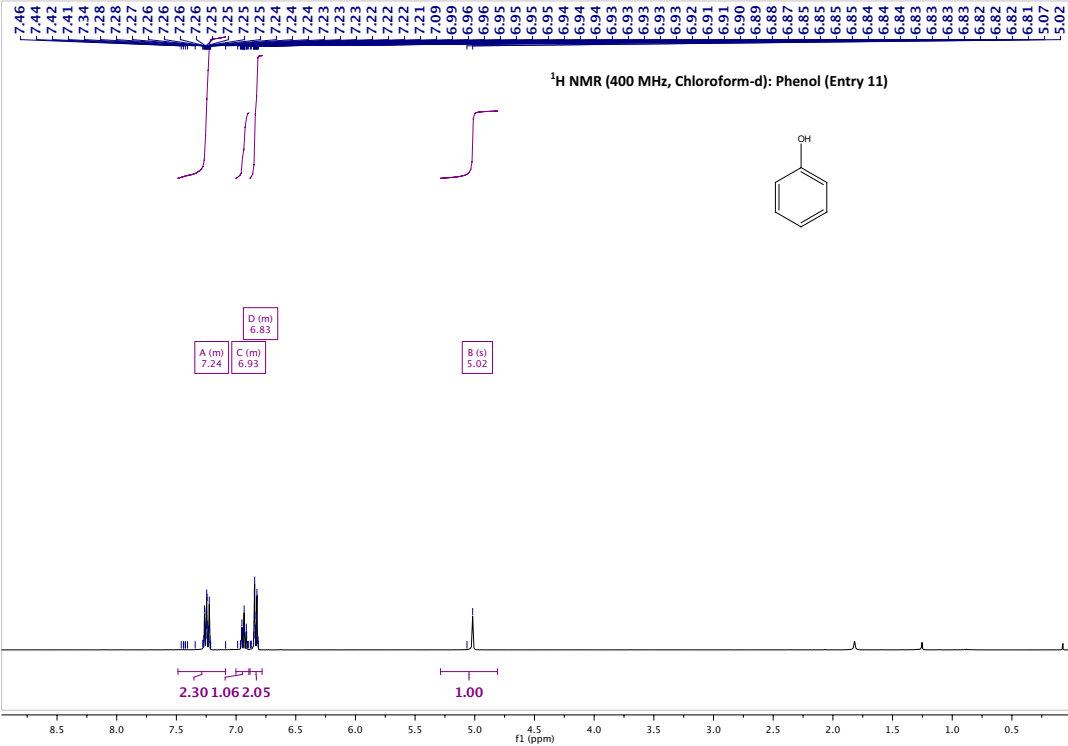

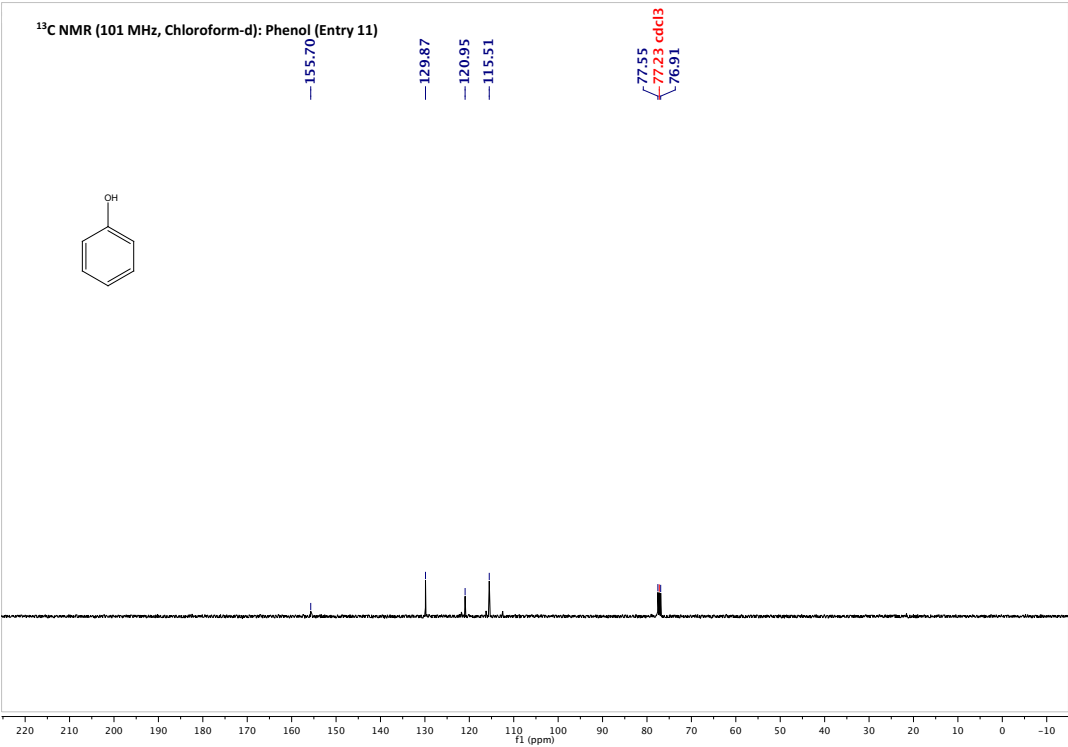

**<sup>1</sup>H NMR (400 MHz, Chloroform-d): 3-Methylphenol**

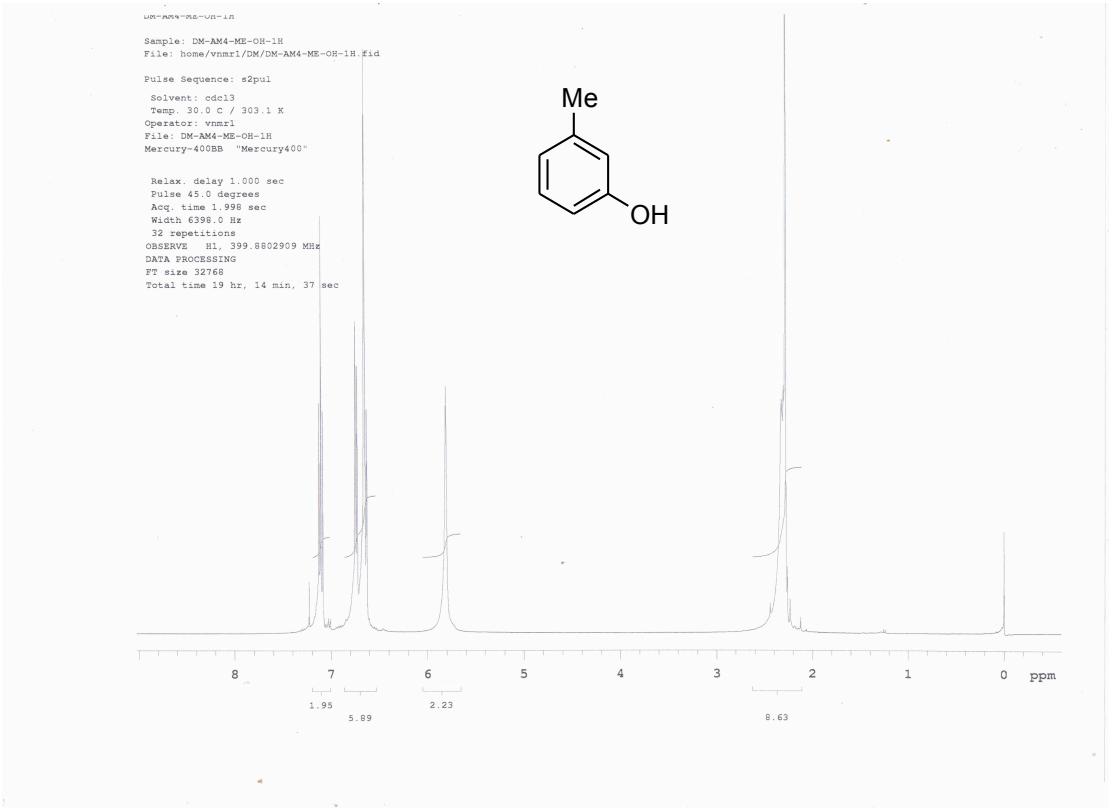

**<sup>13</sup>C NMR (101 MHz, Chloroform-d): 3-Methylphenol**

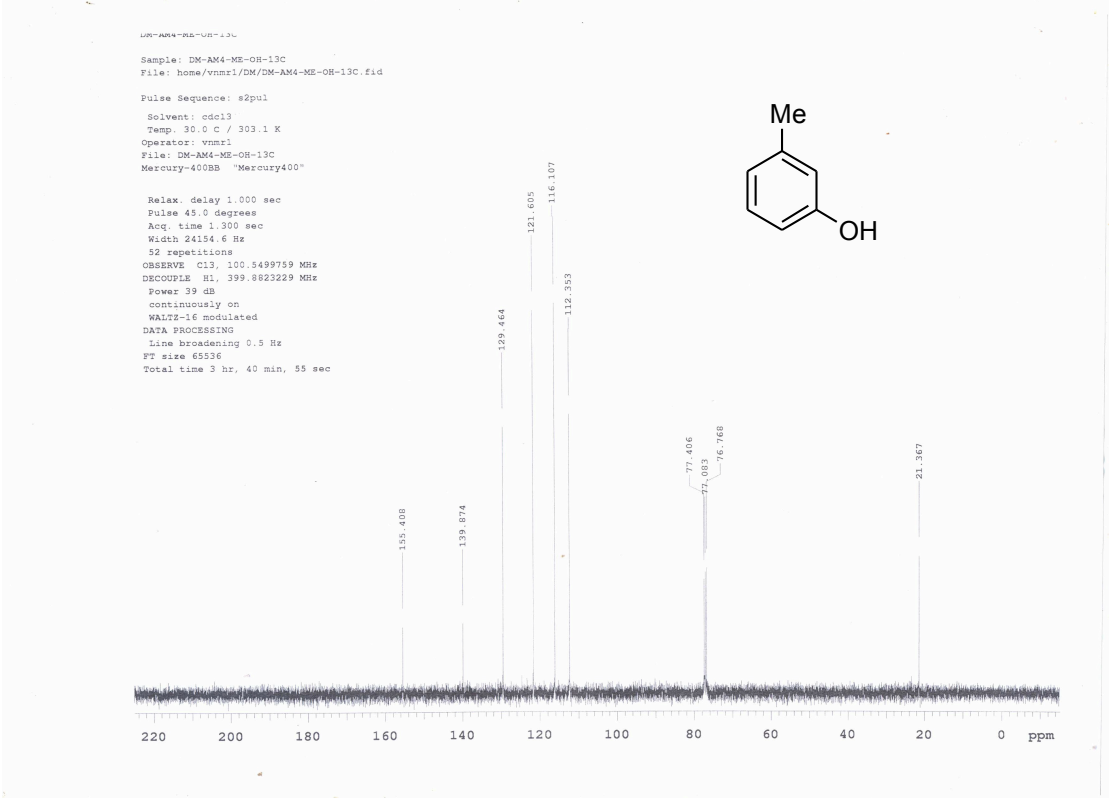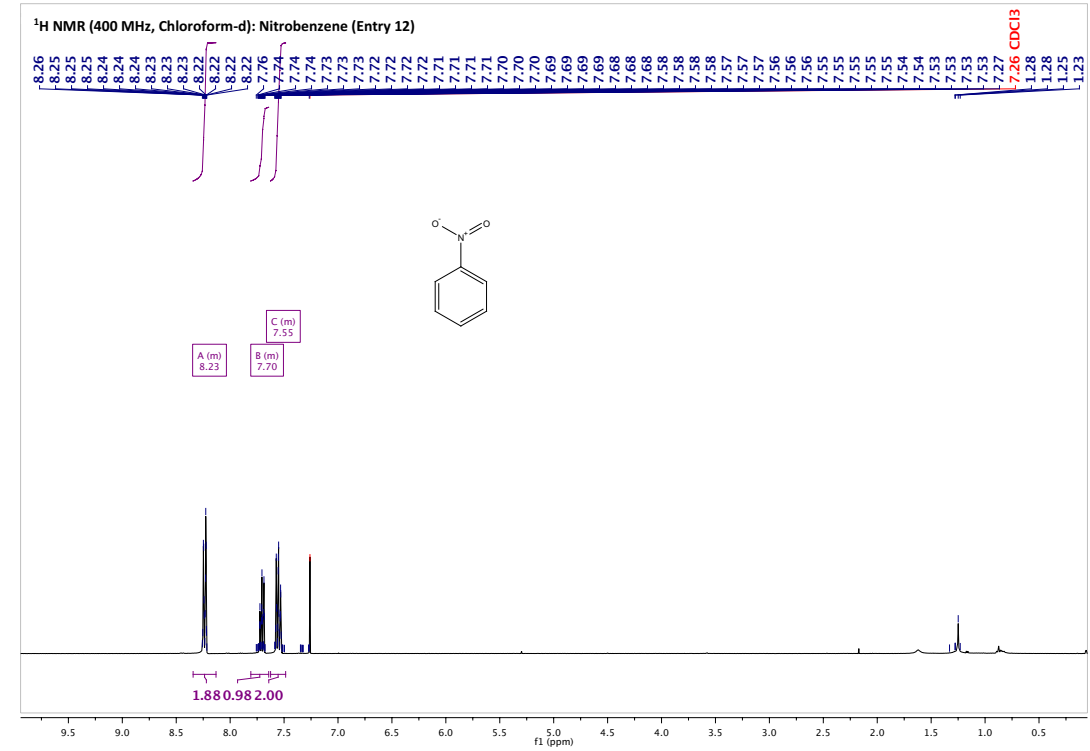

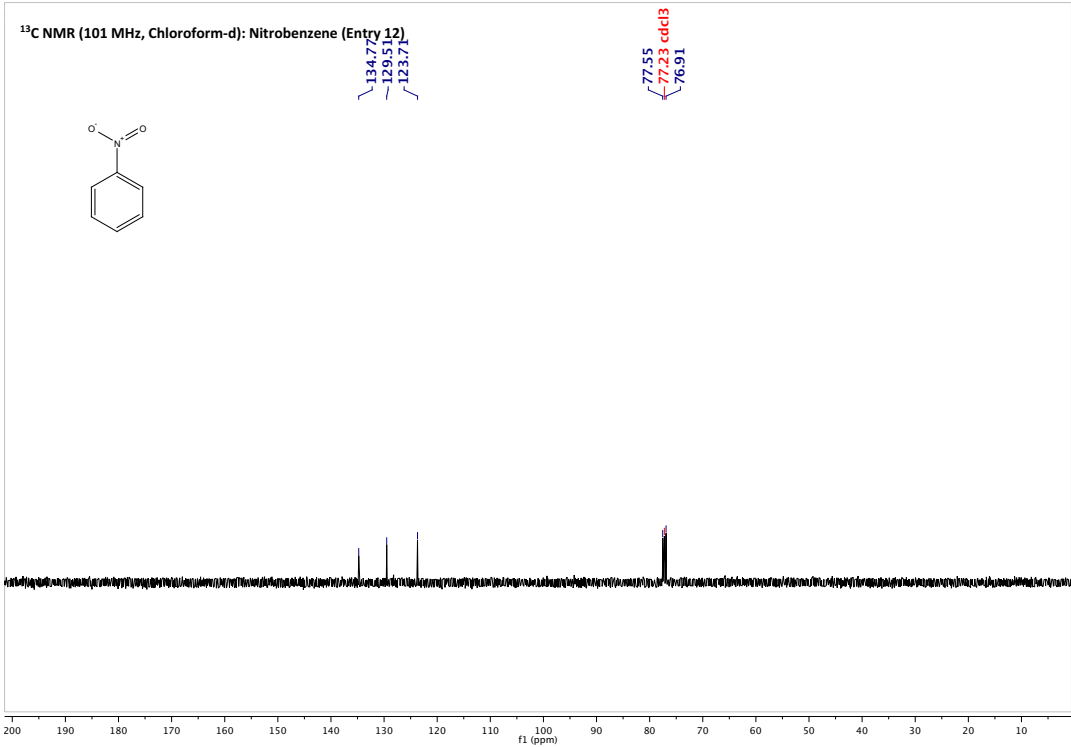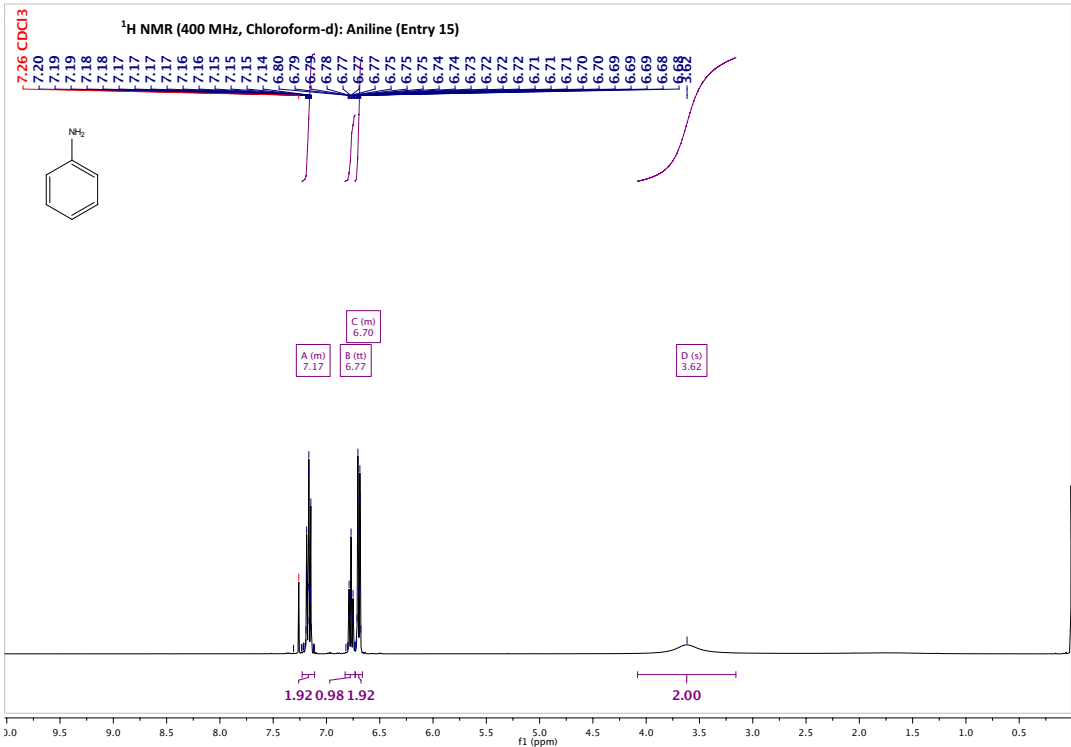

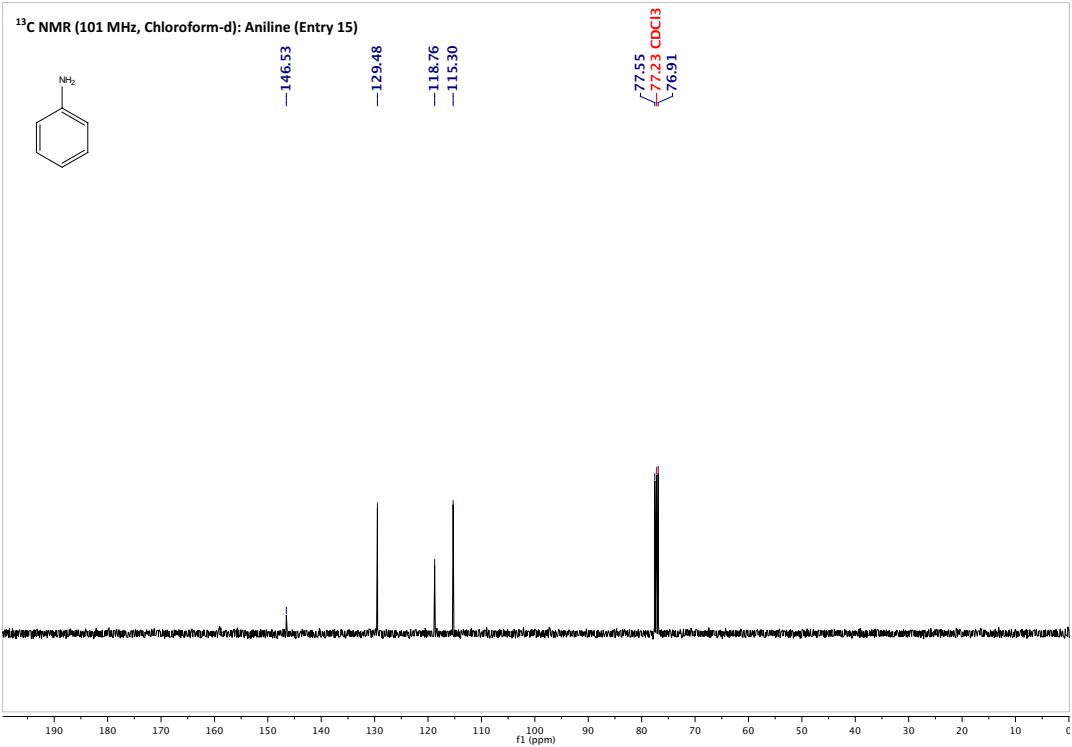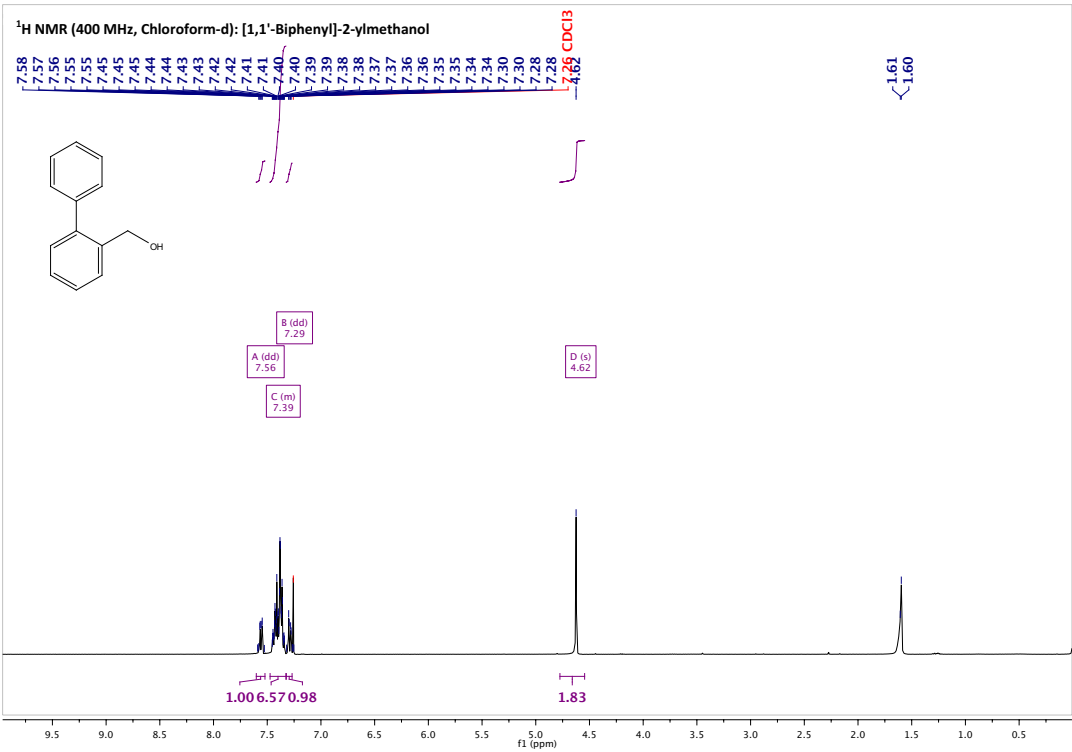

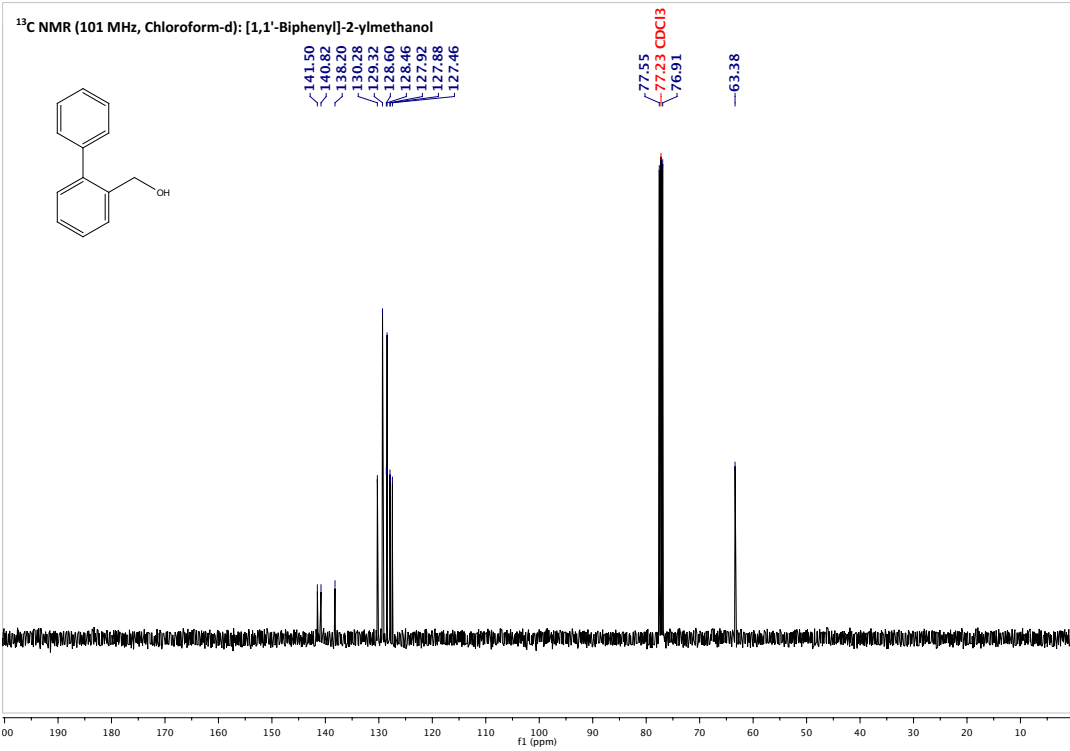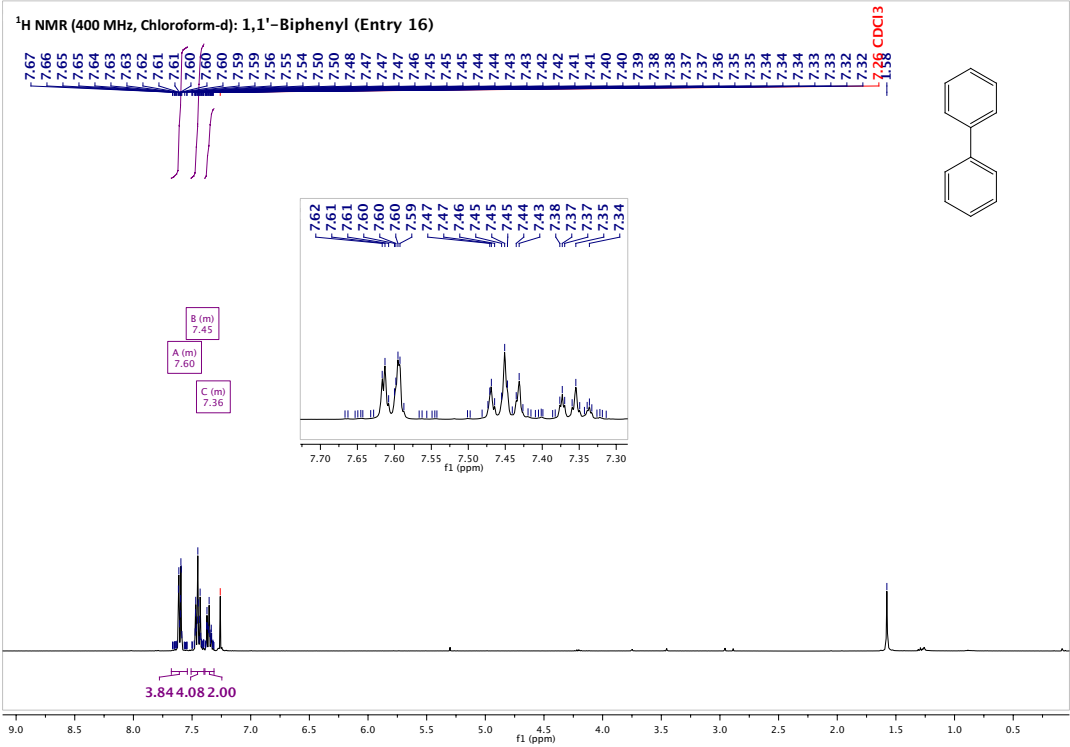



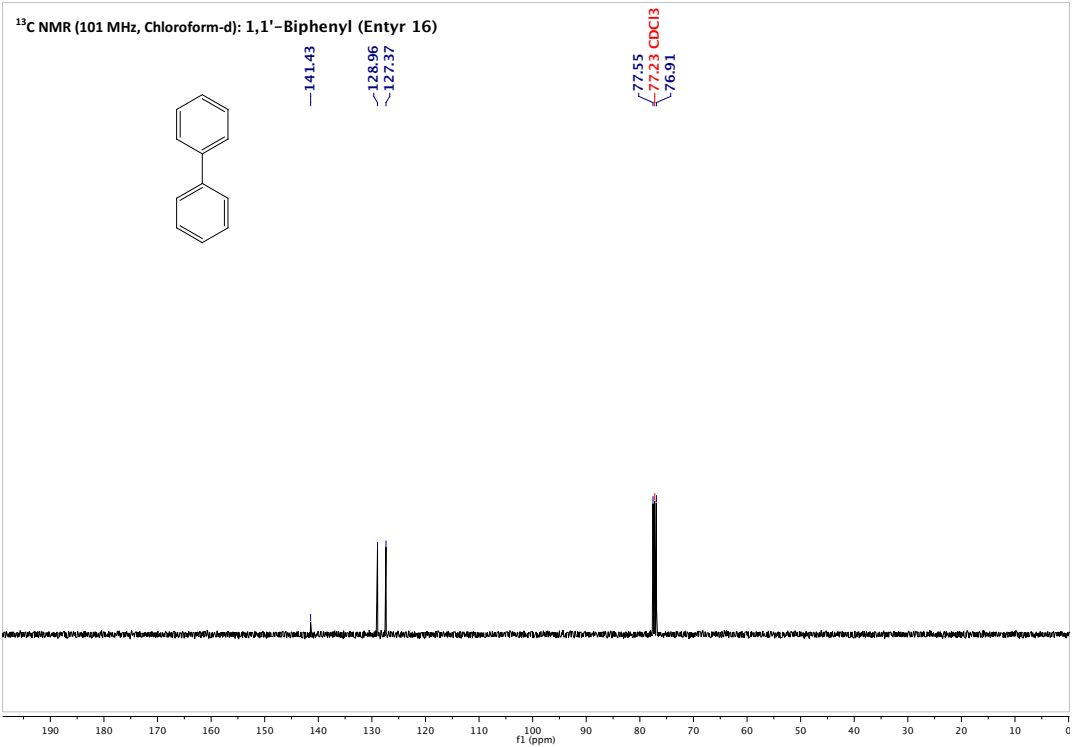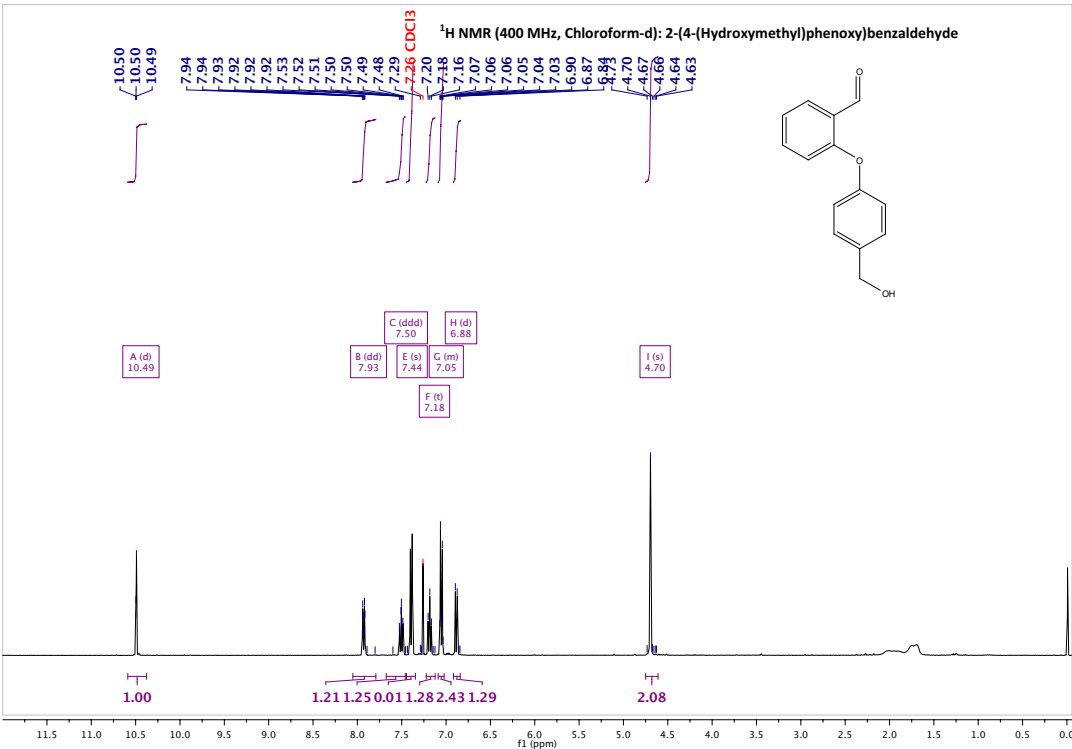

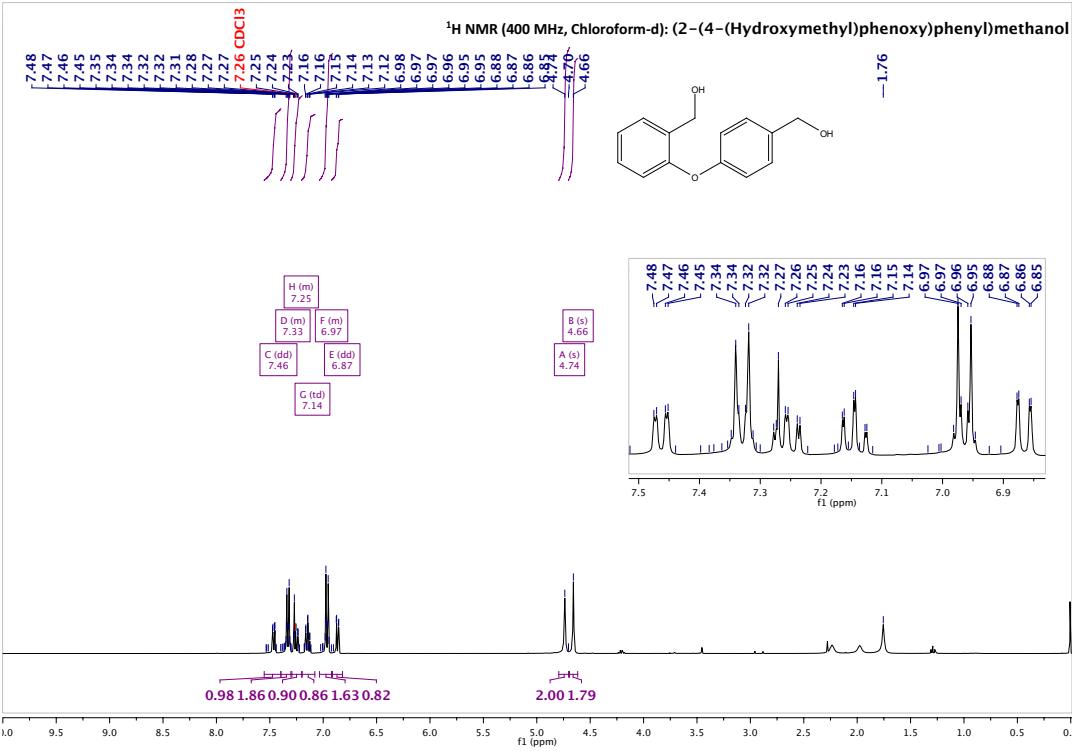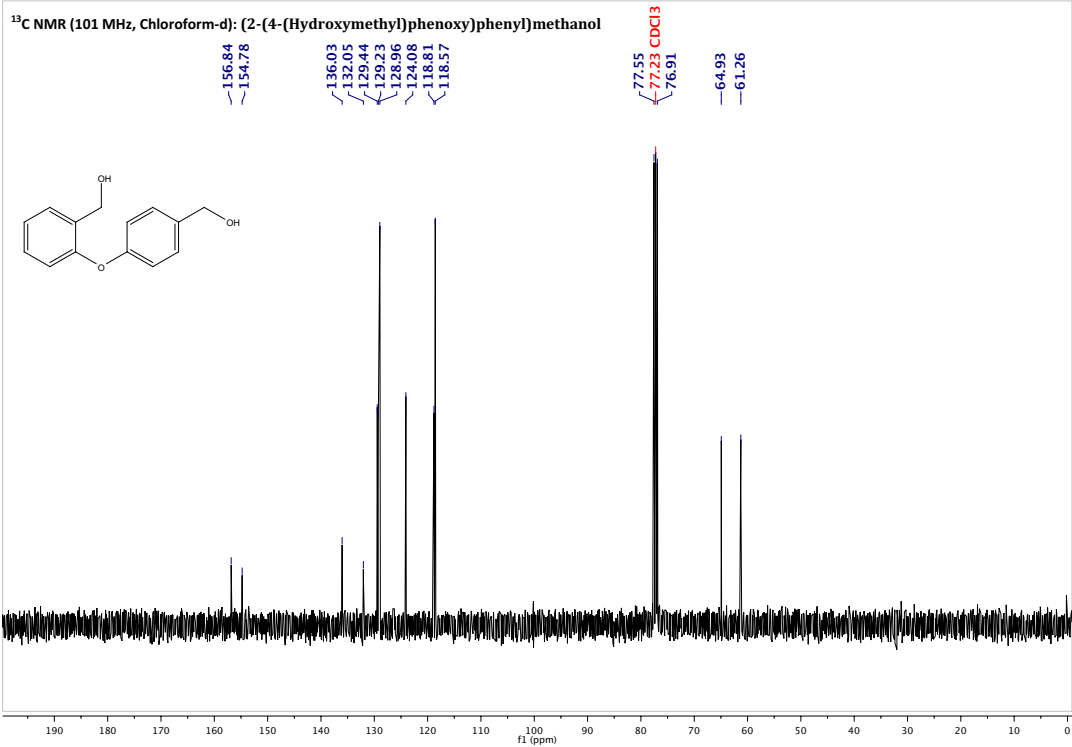

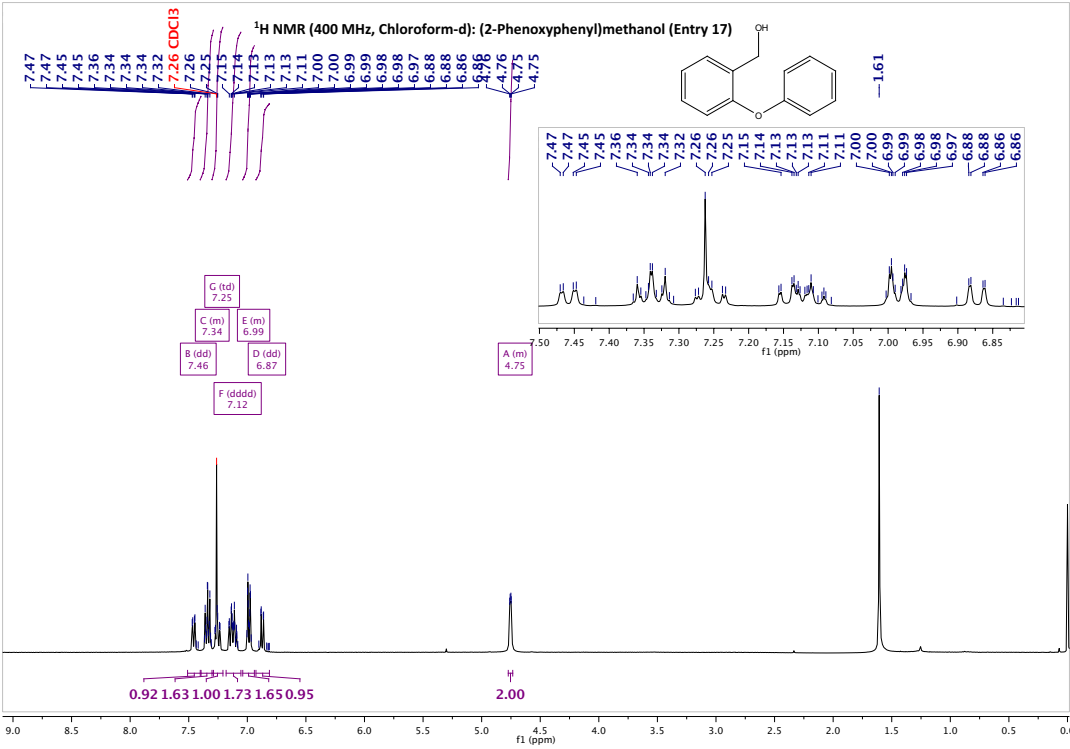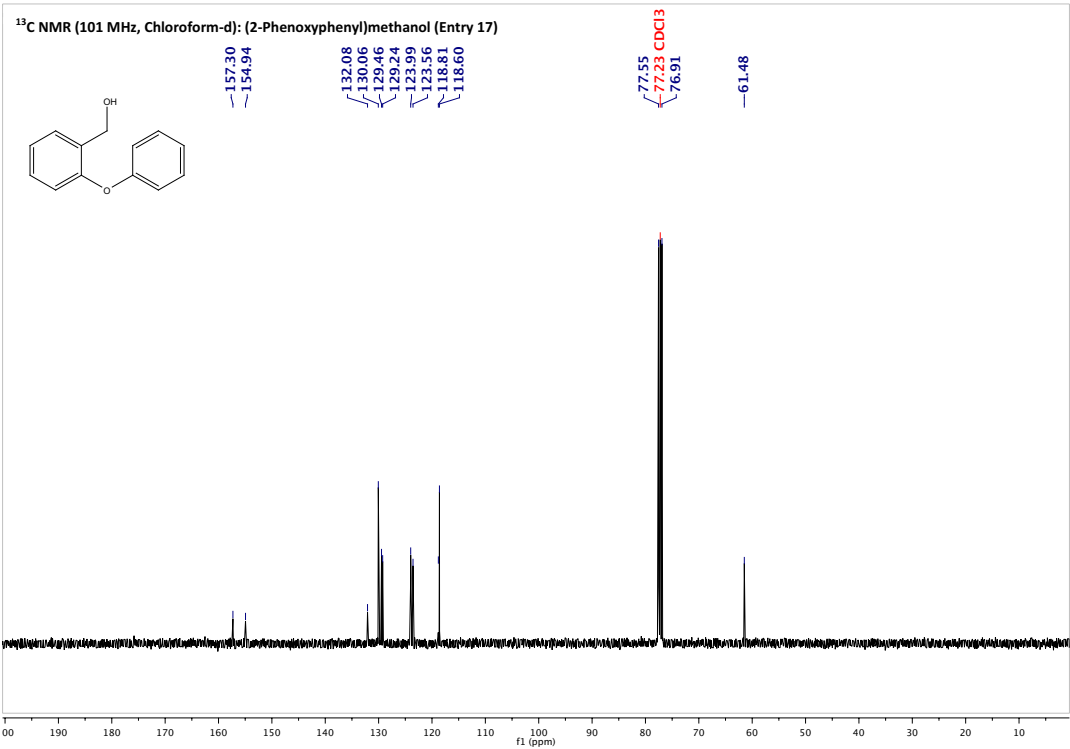

<sup>1</sup>H NMR (400 MHz, Chloroform-d): 4-(4-(Hydroxymethyl)phenoxy)benzonitrile

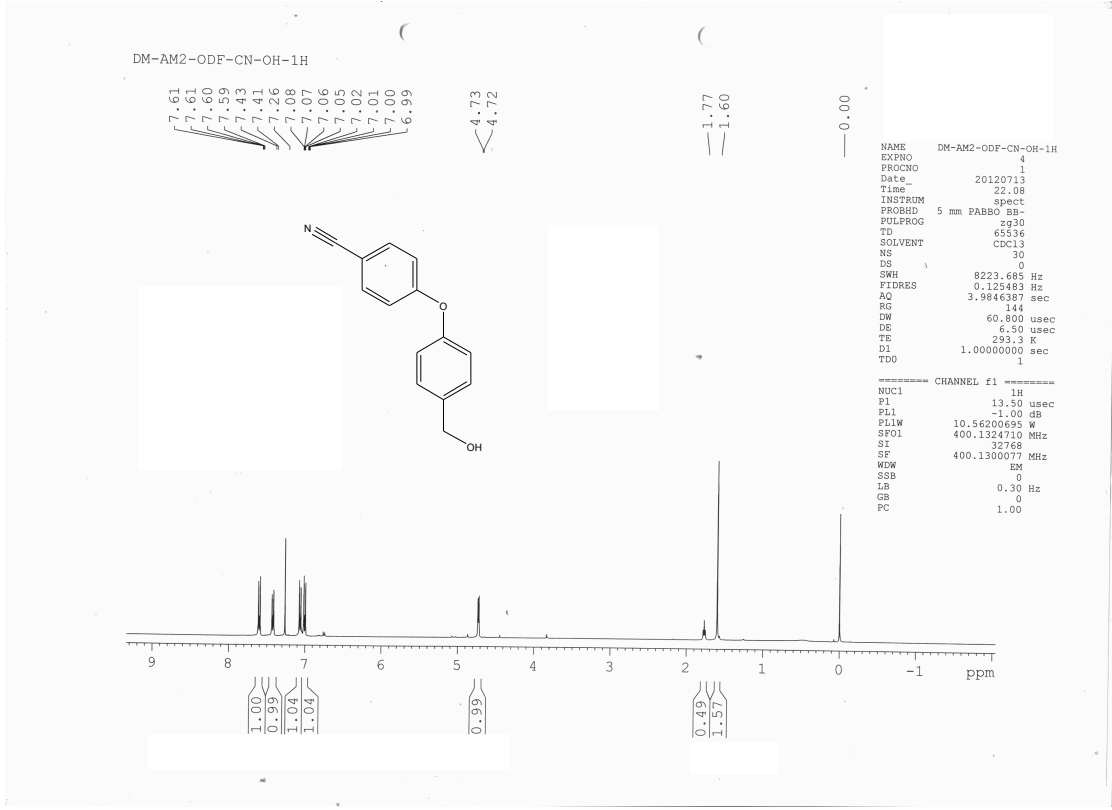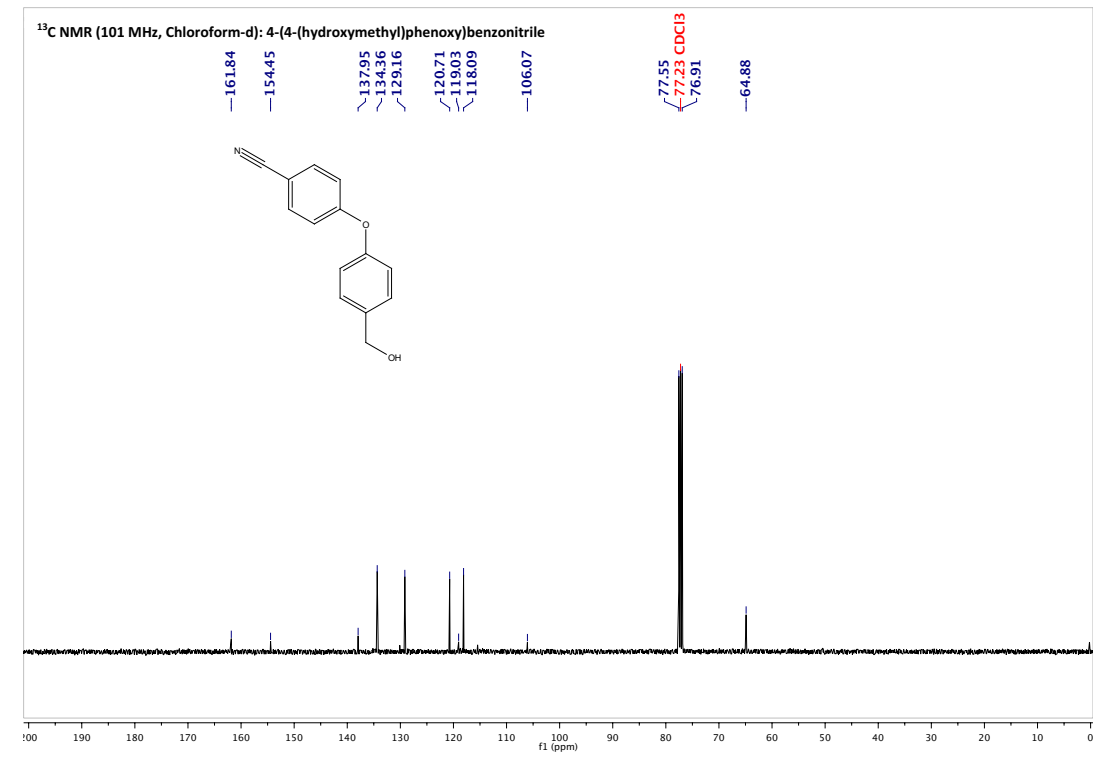

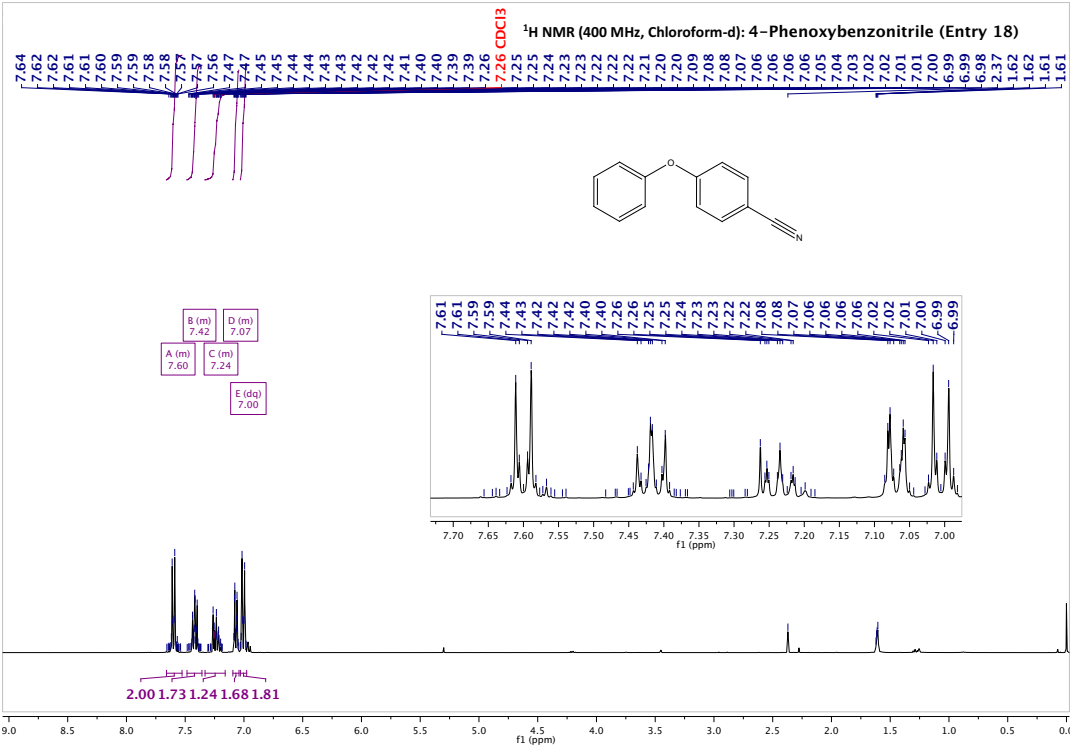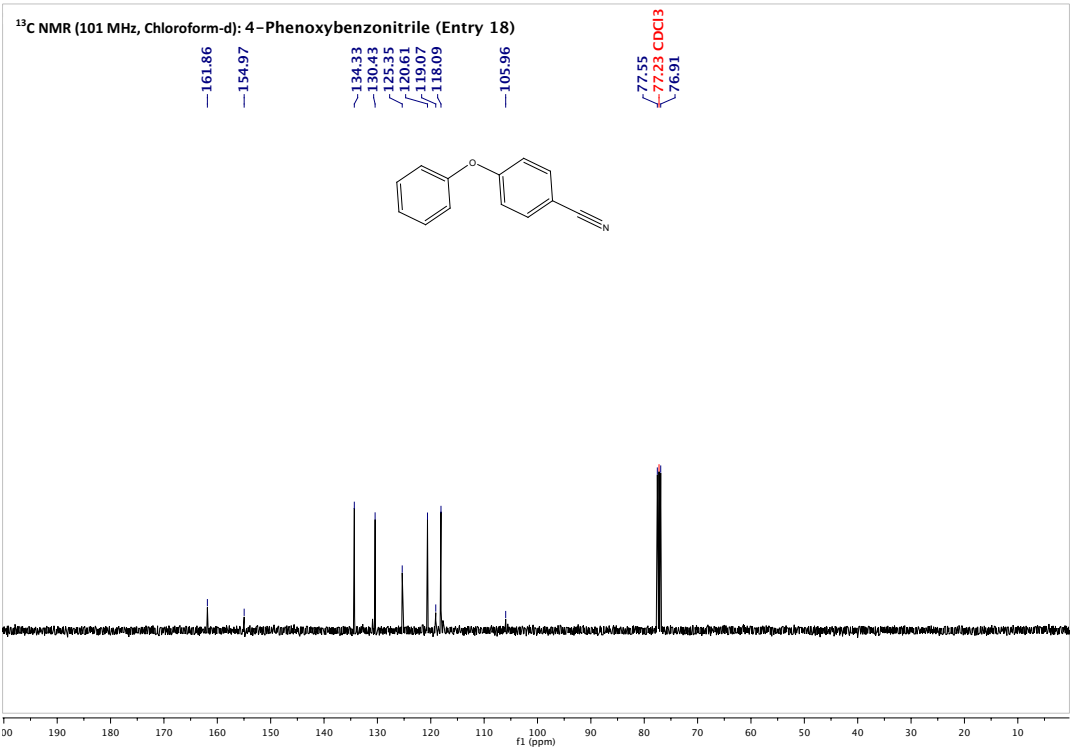

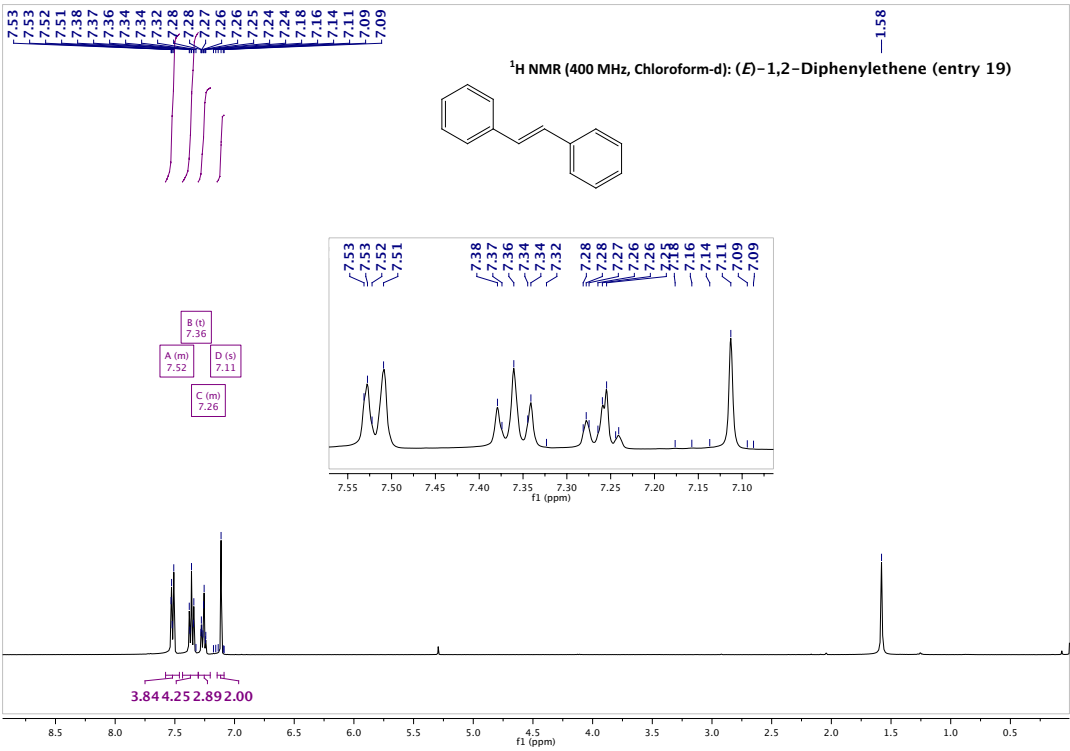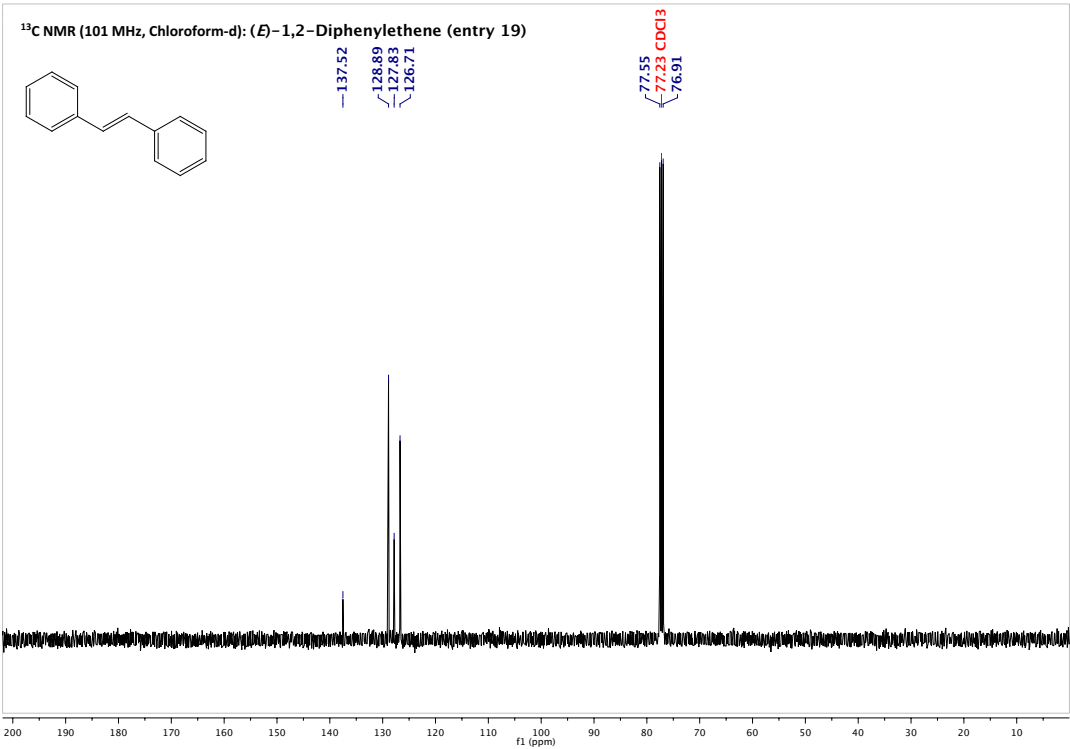

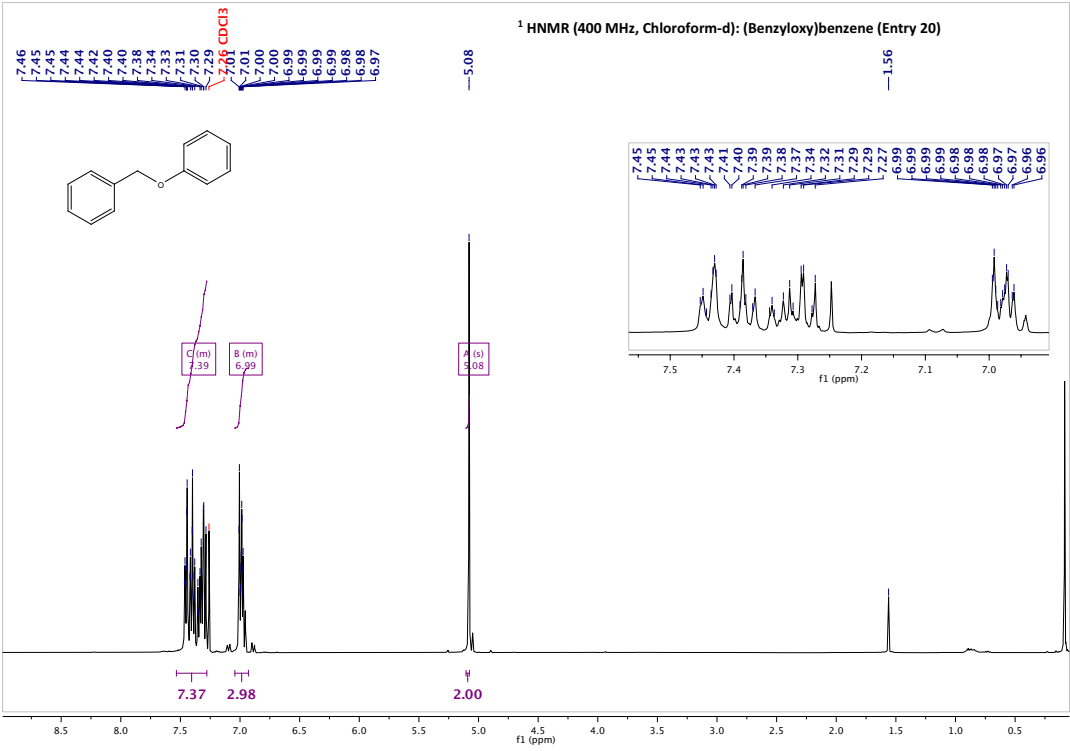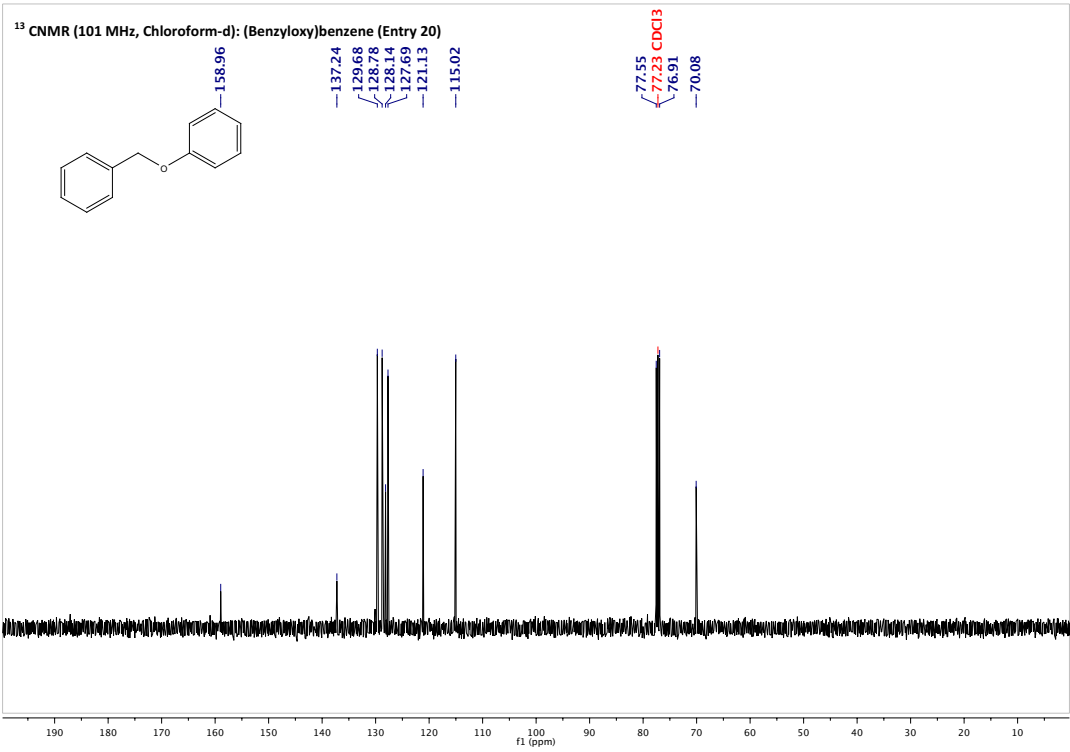

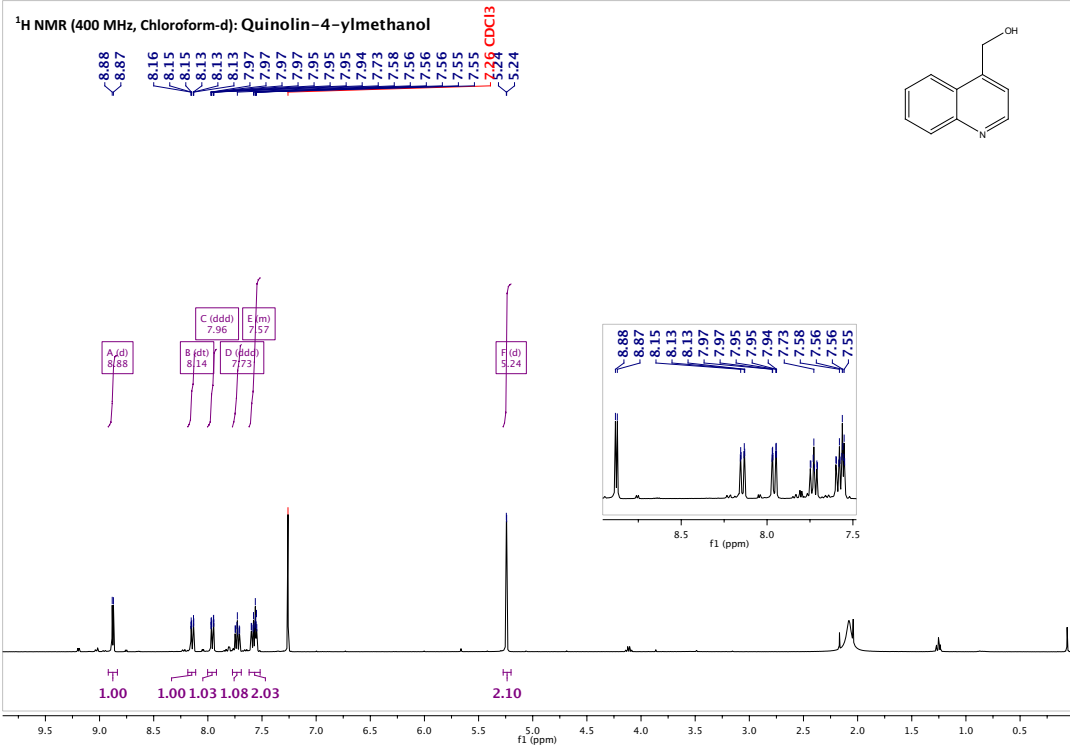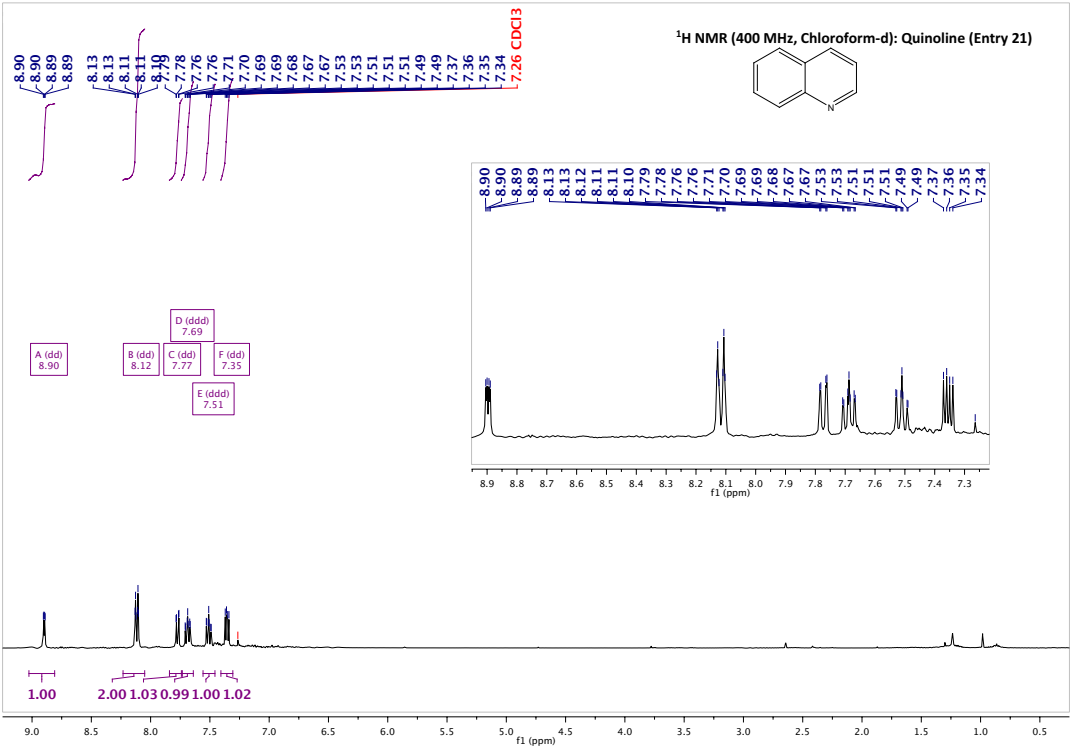



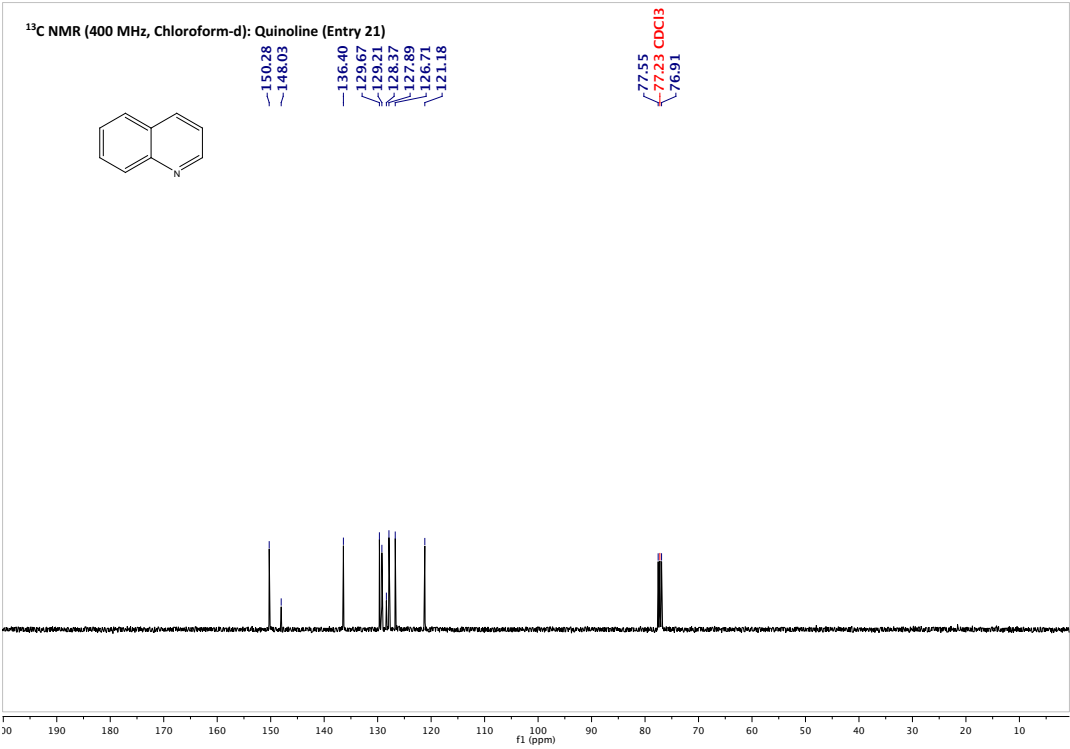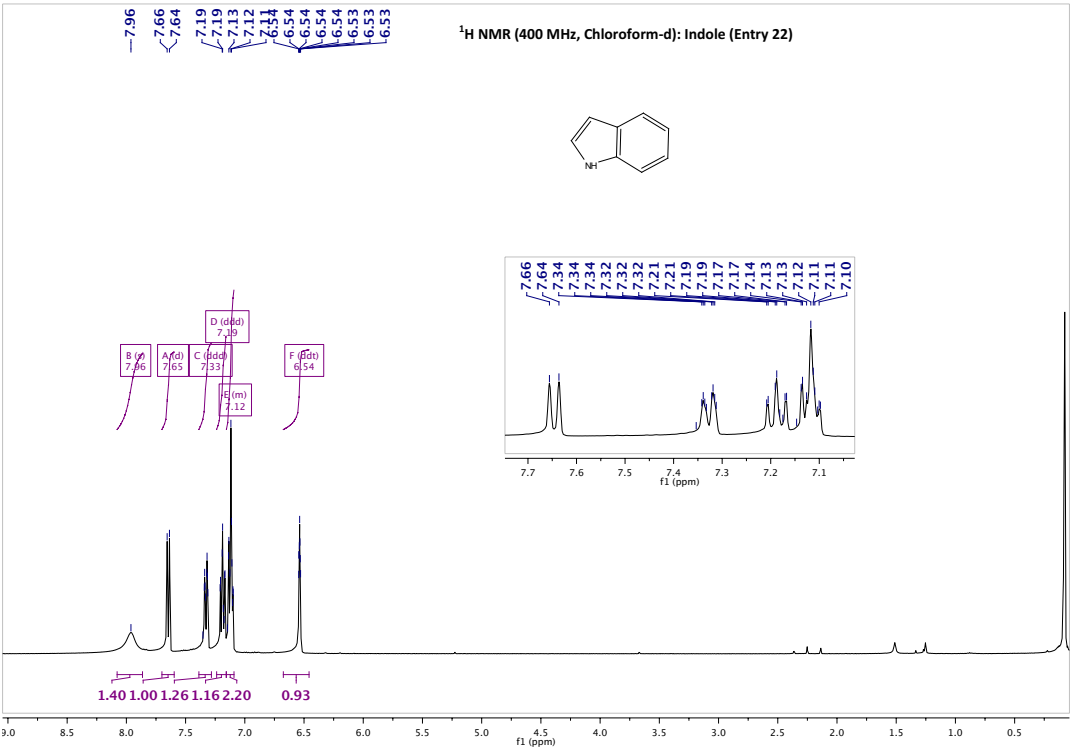

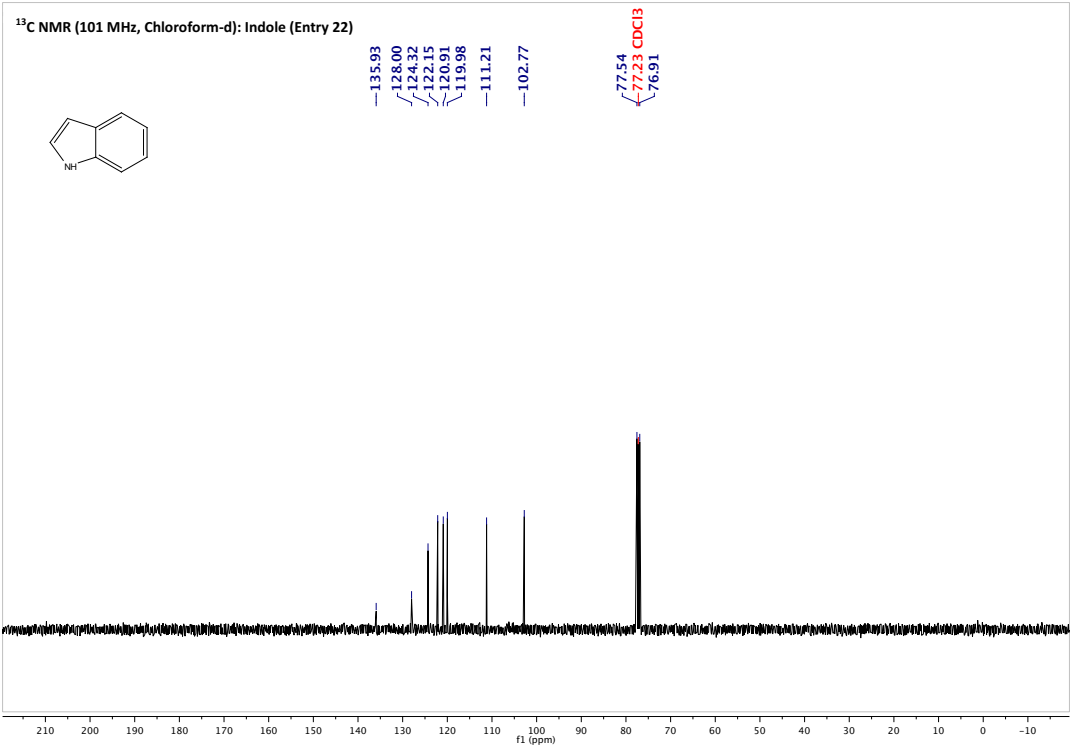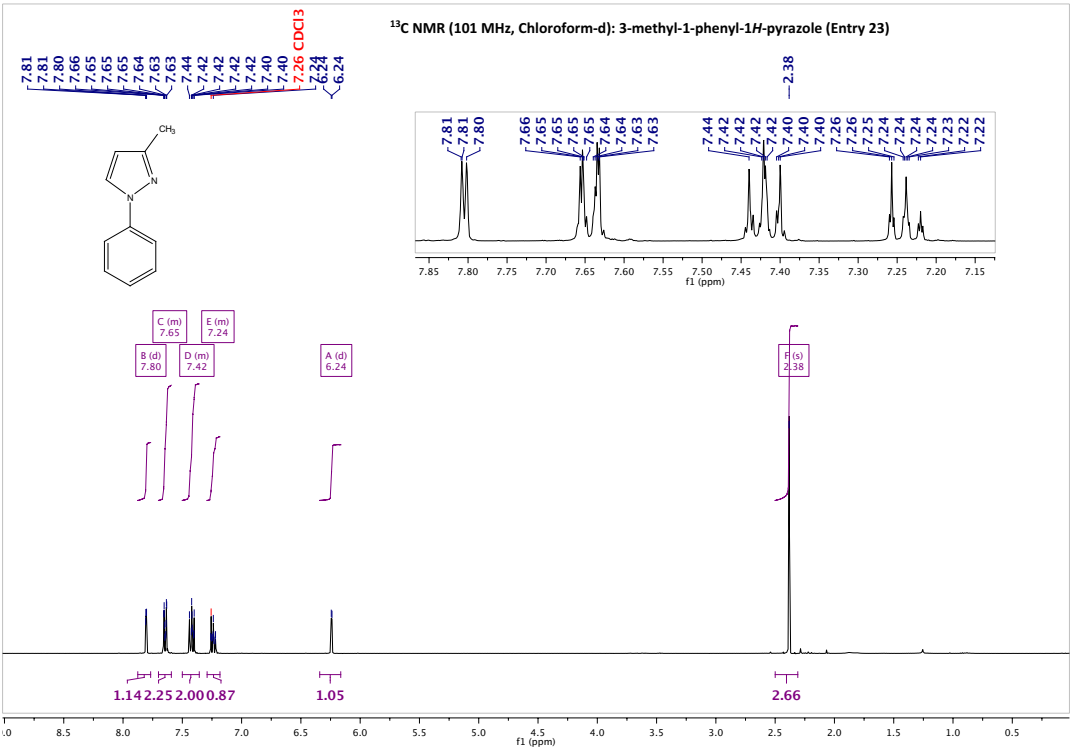

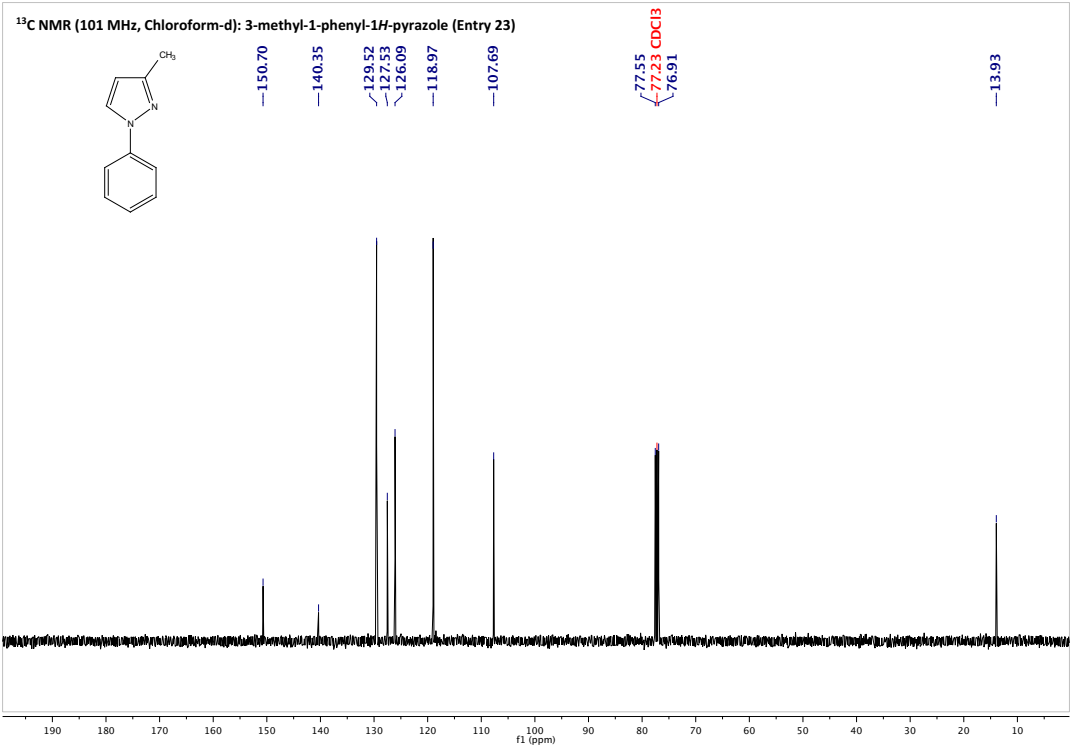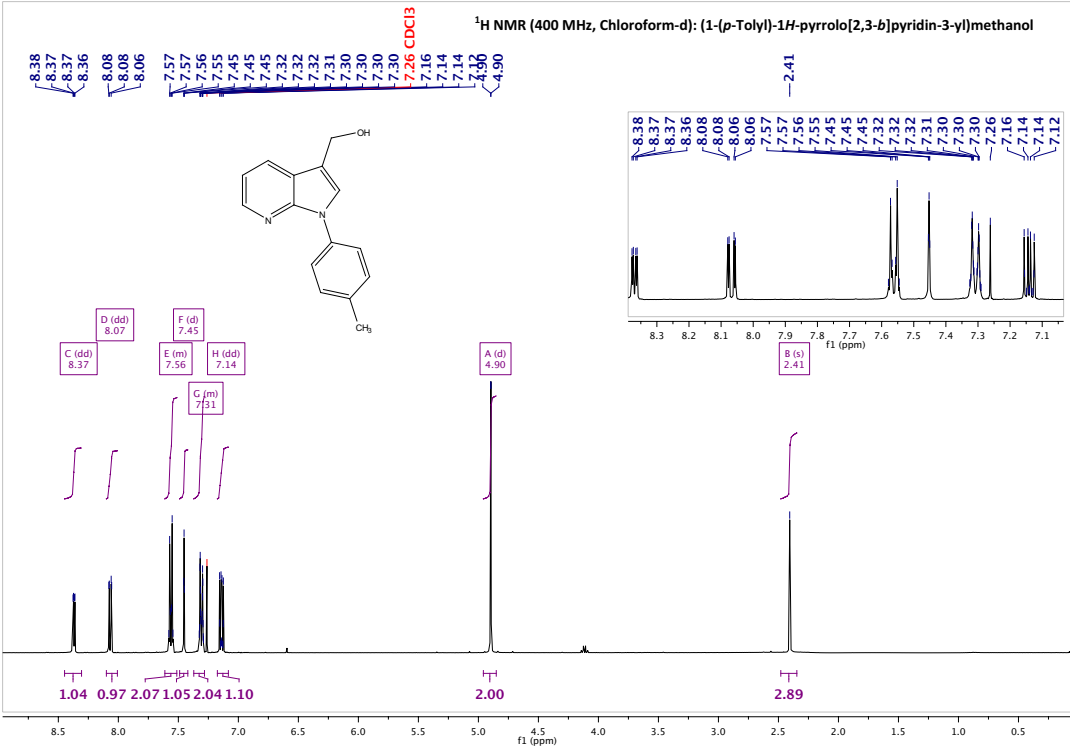

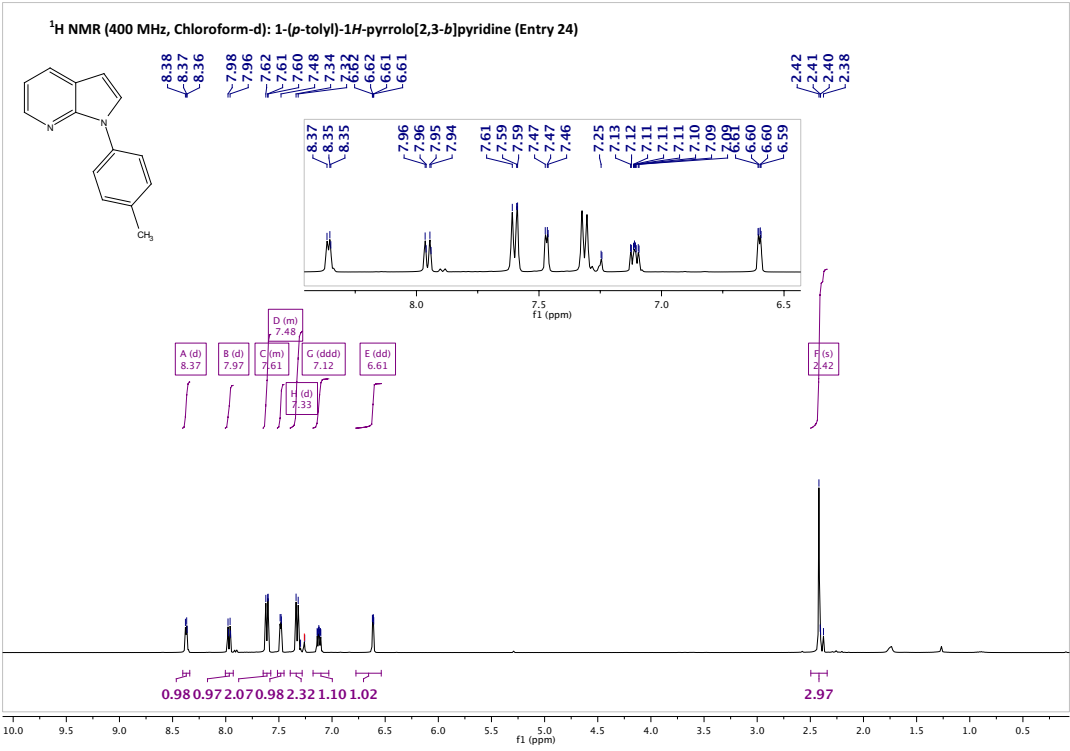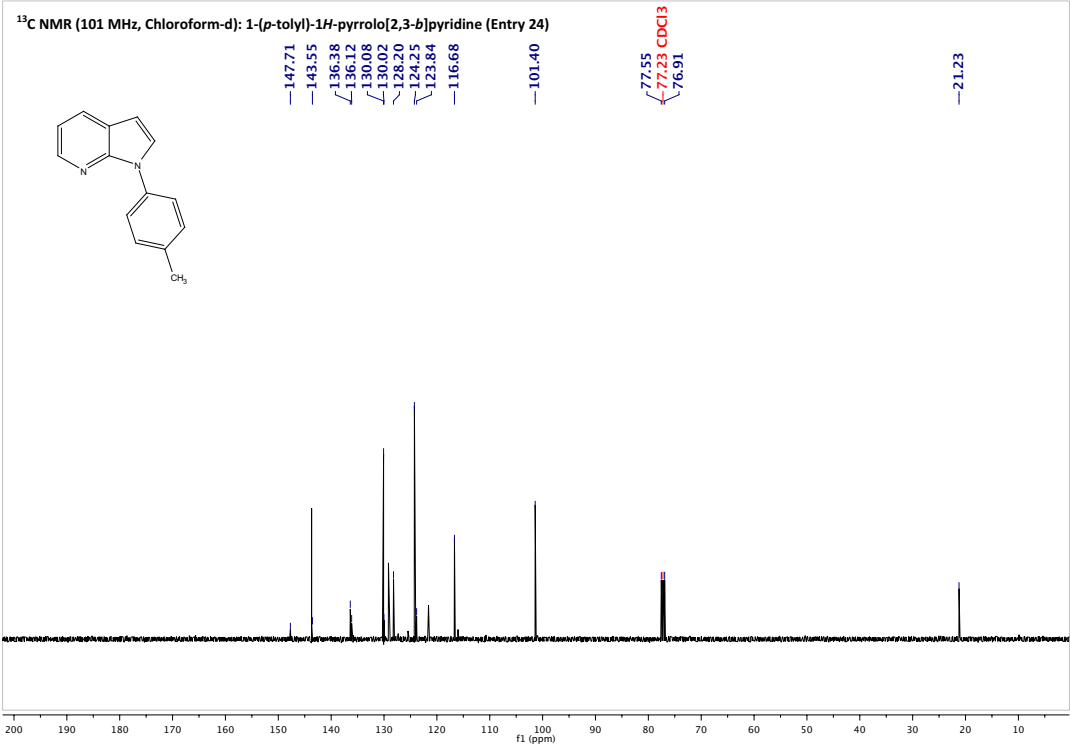

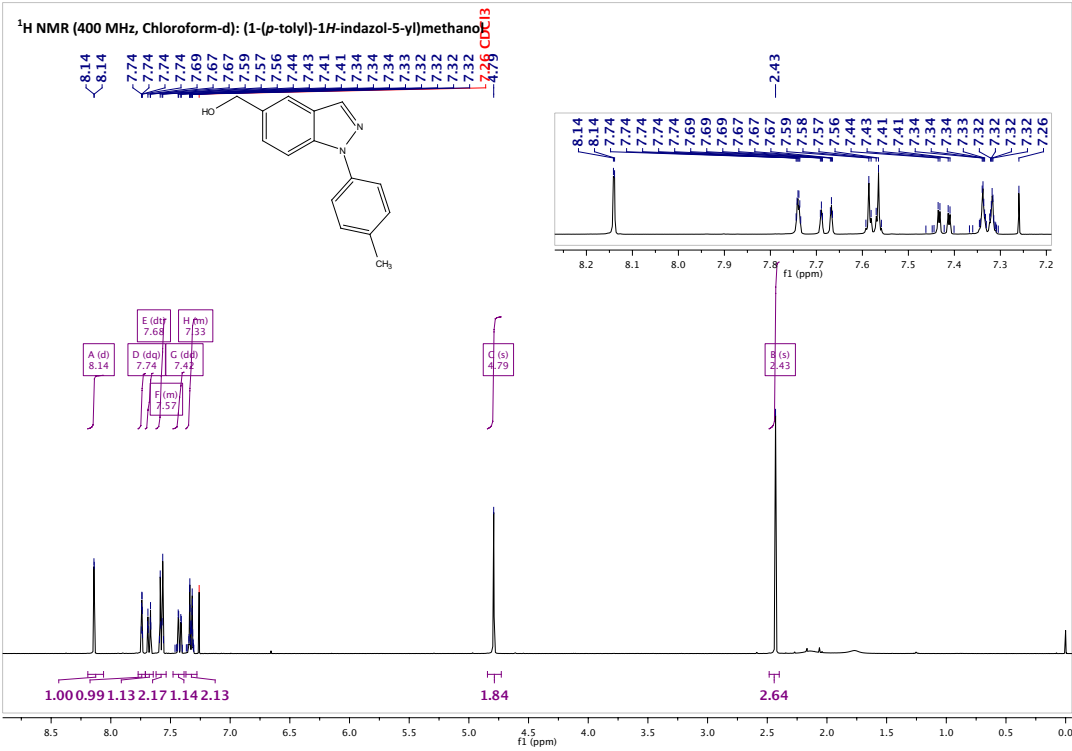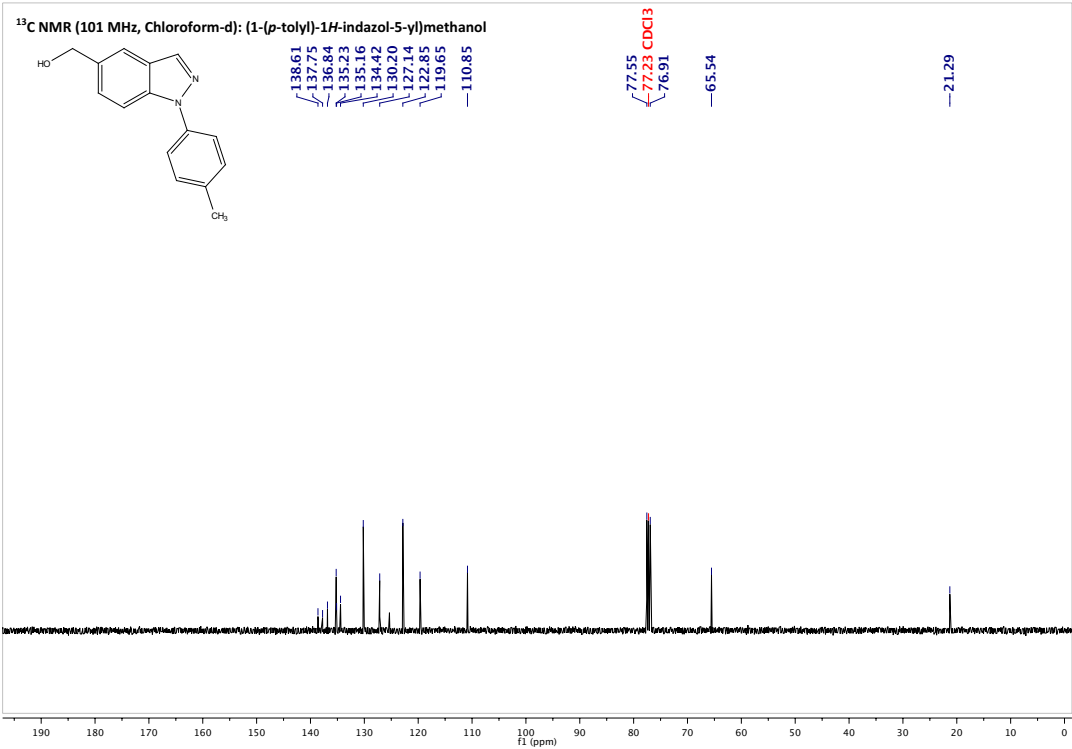

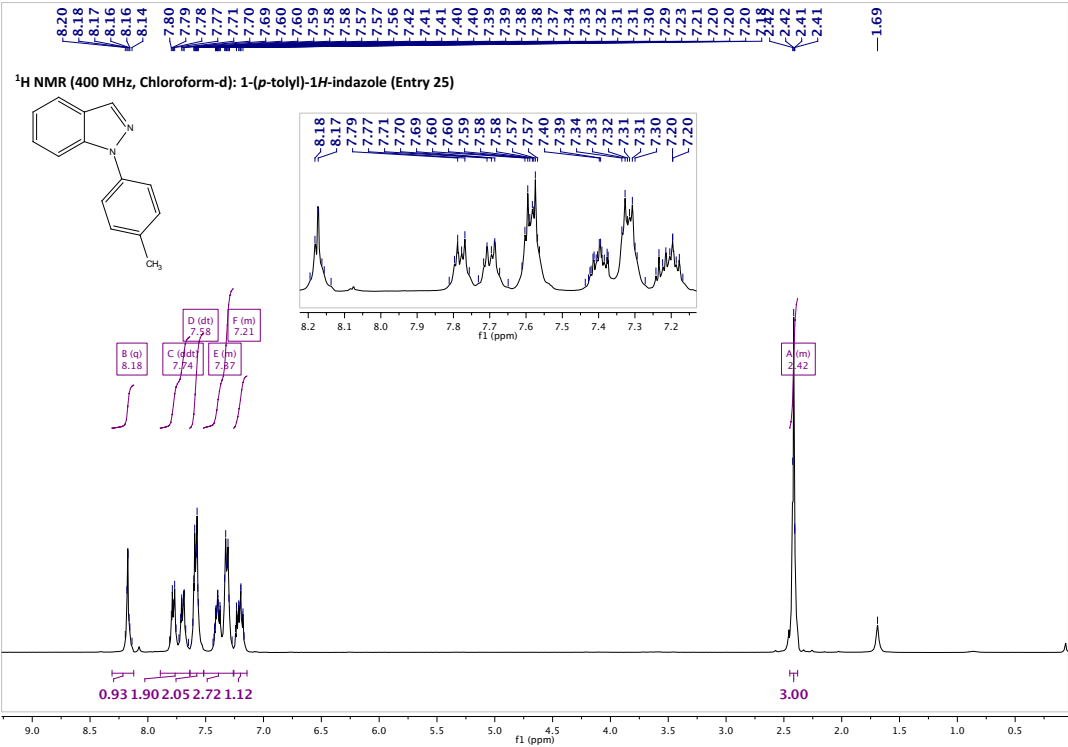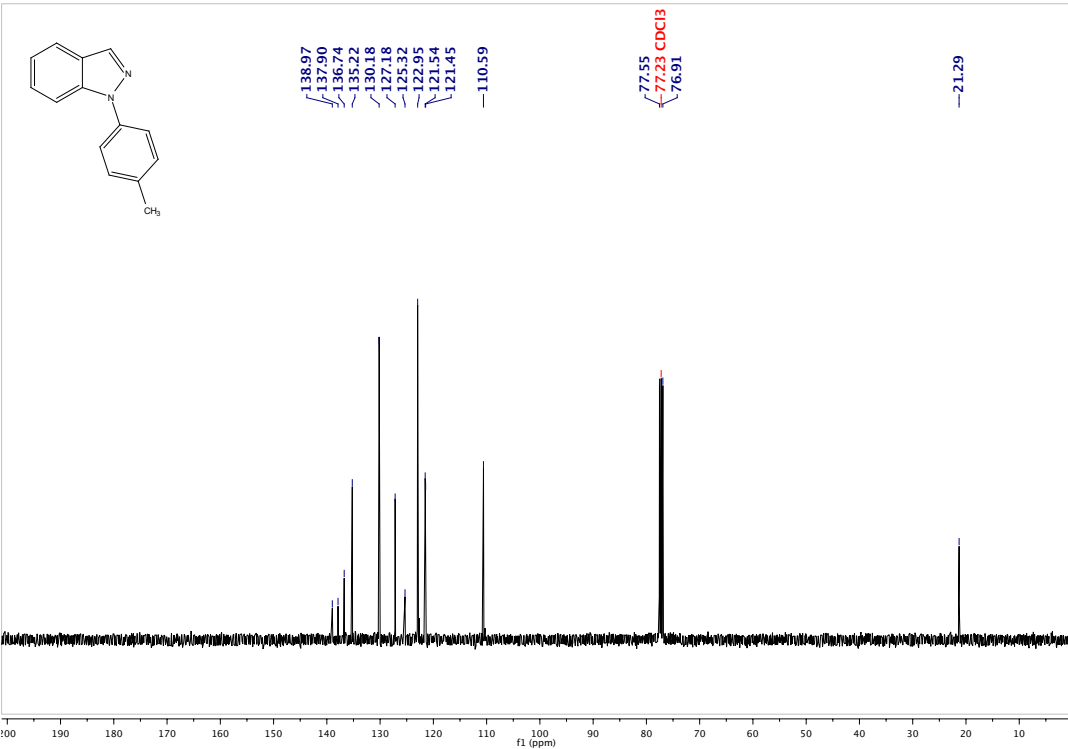

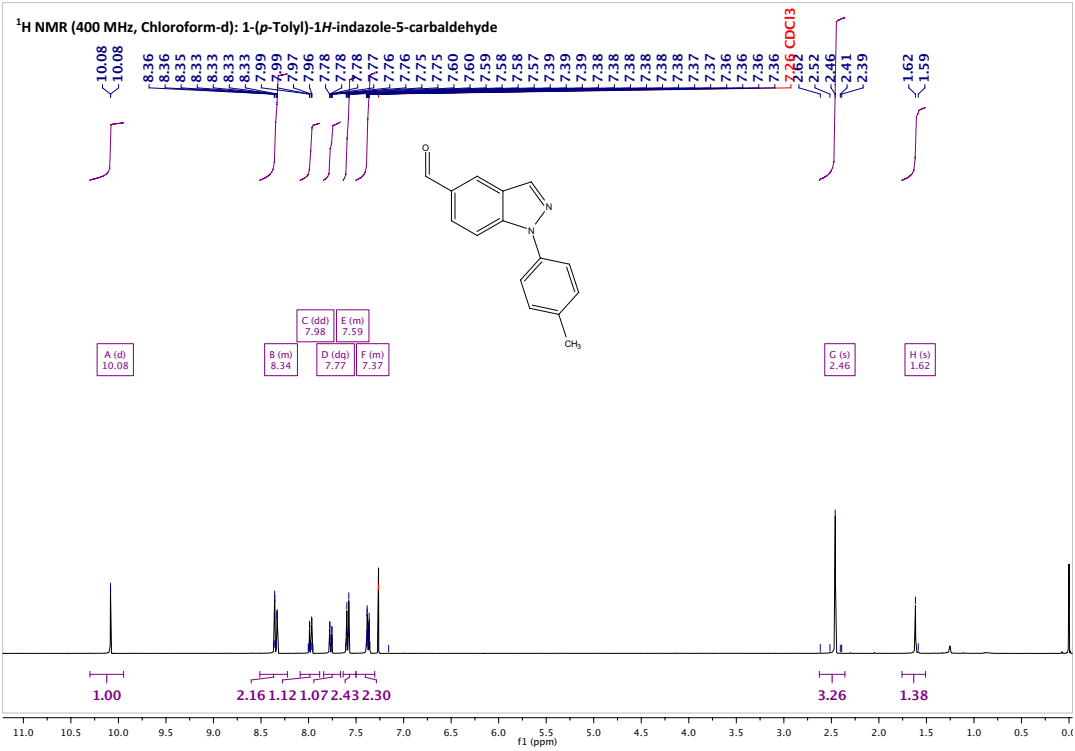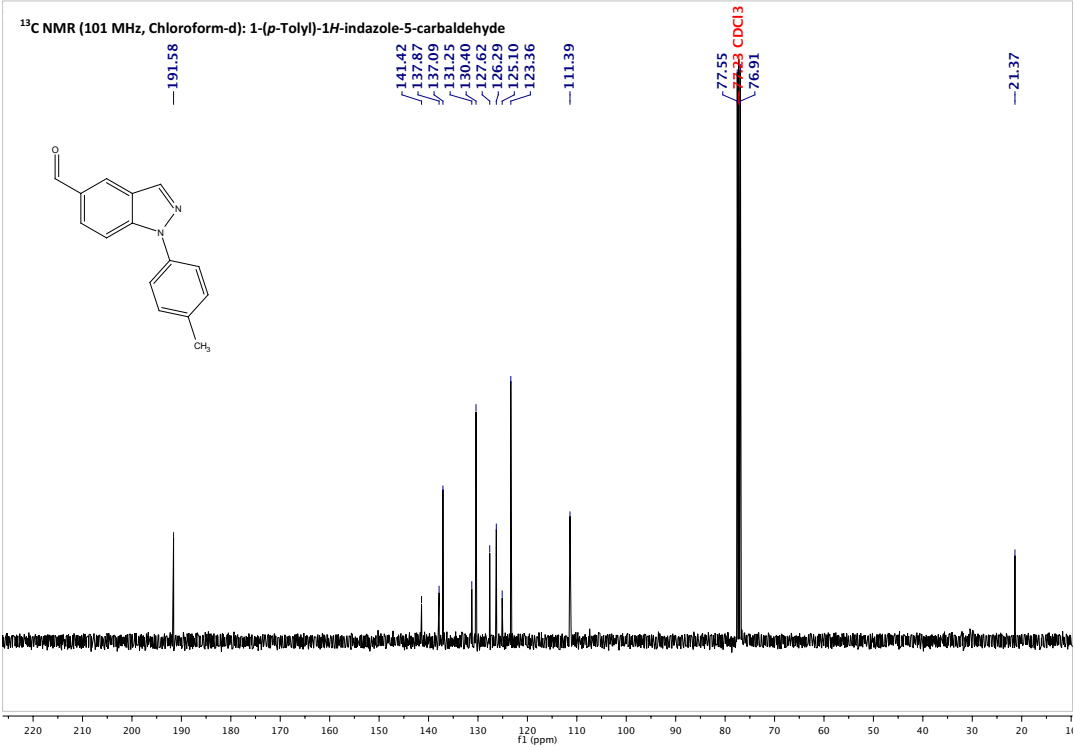

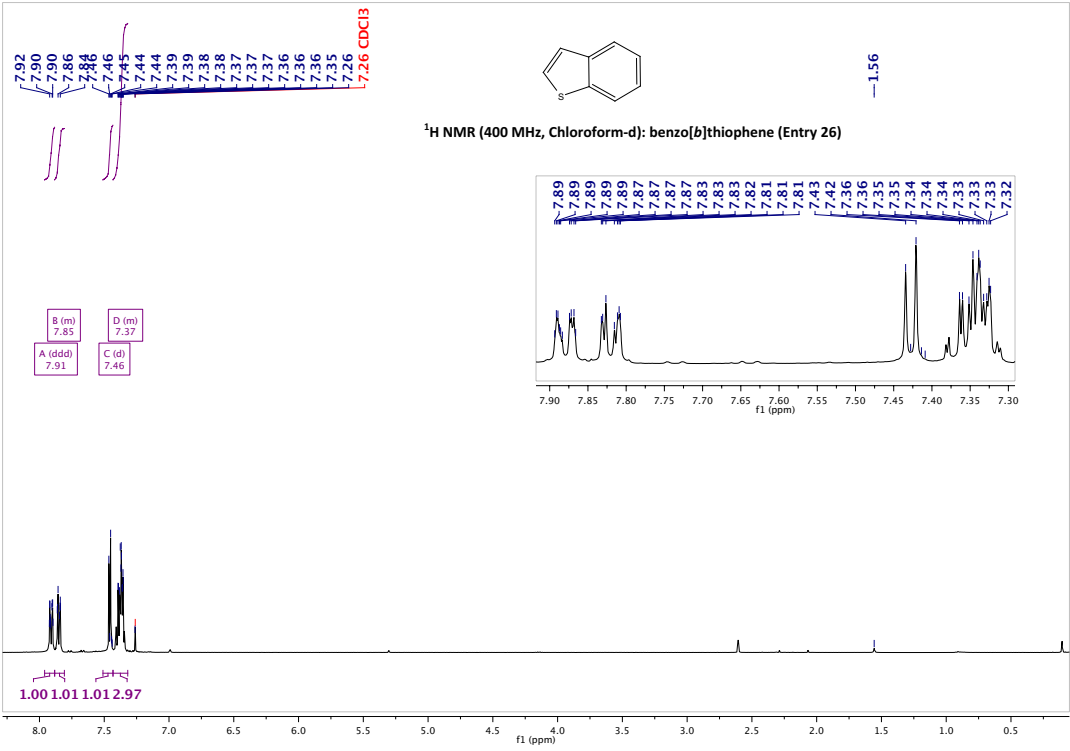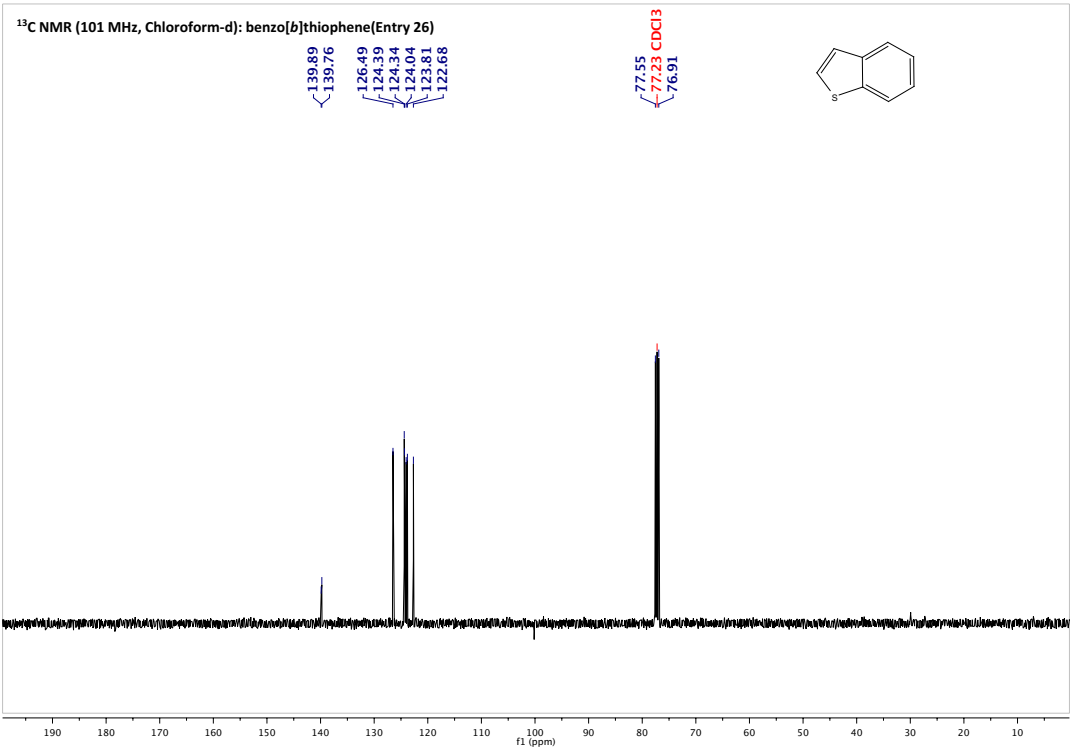



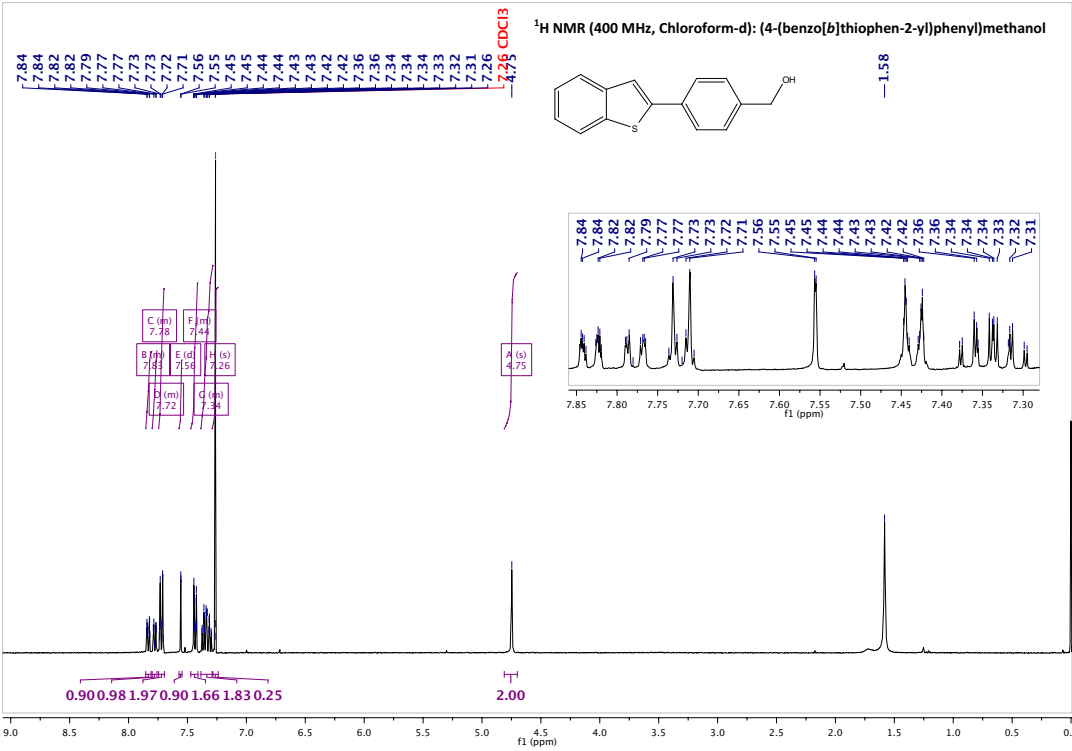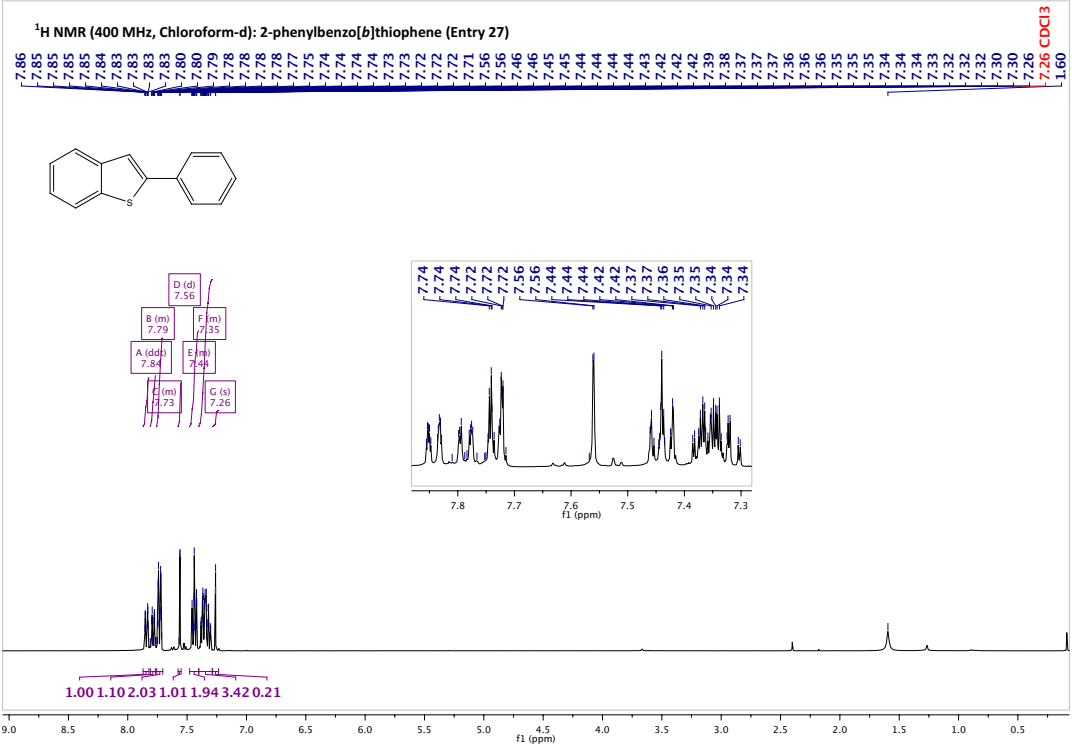



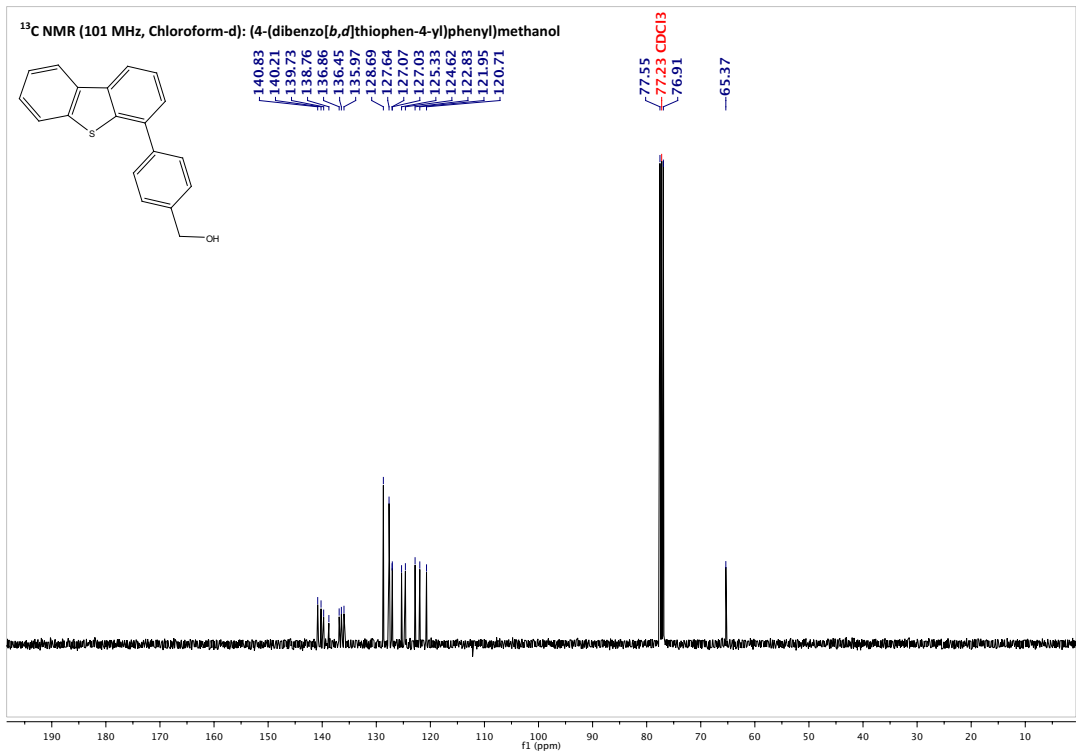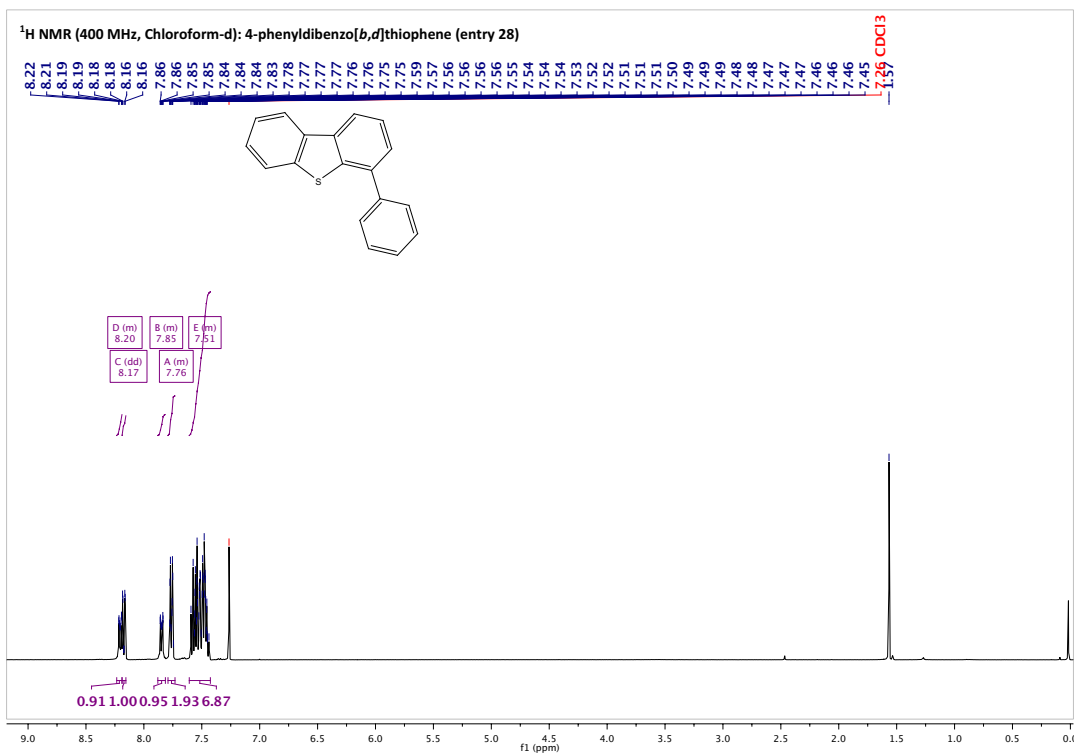

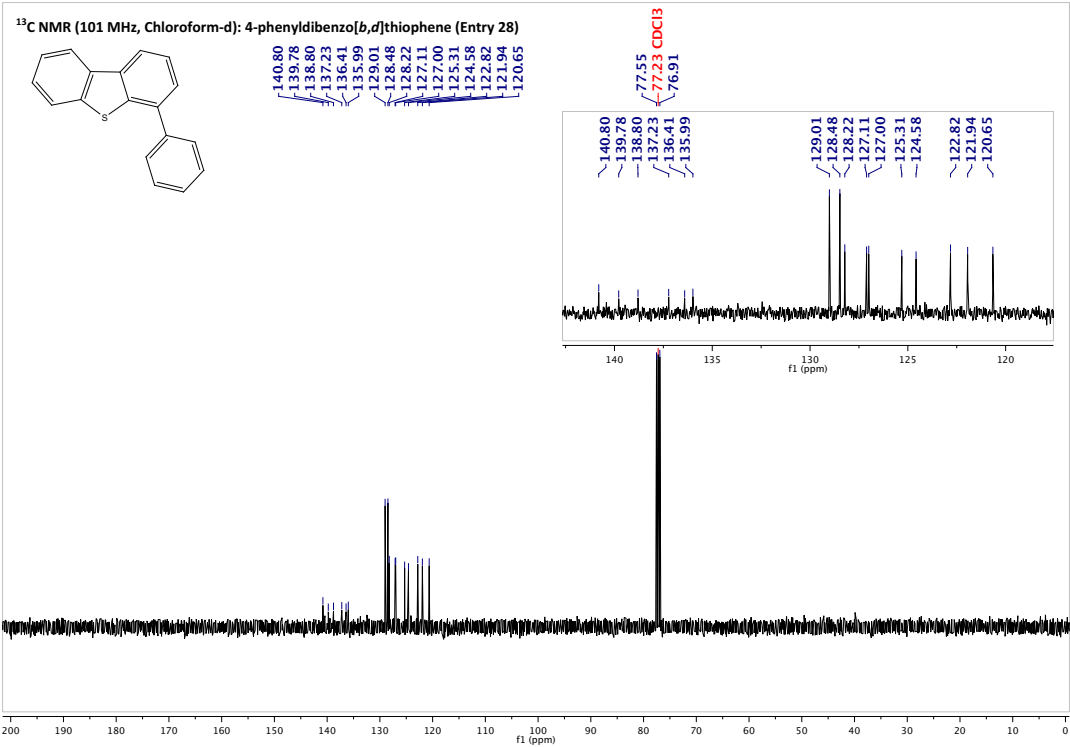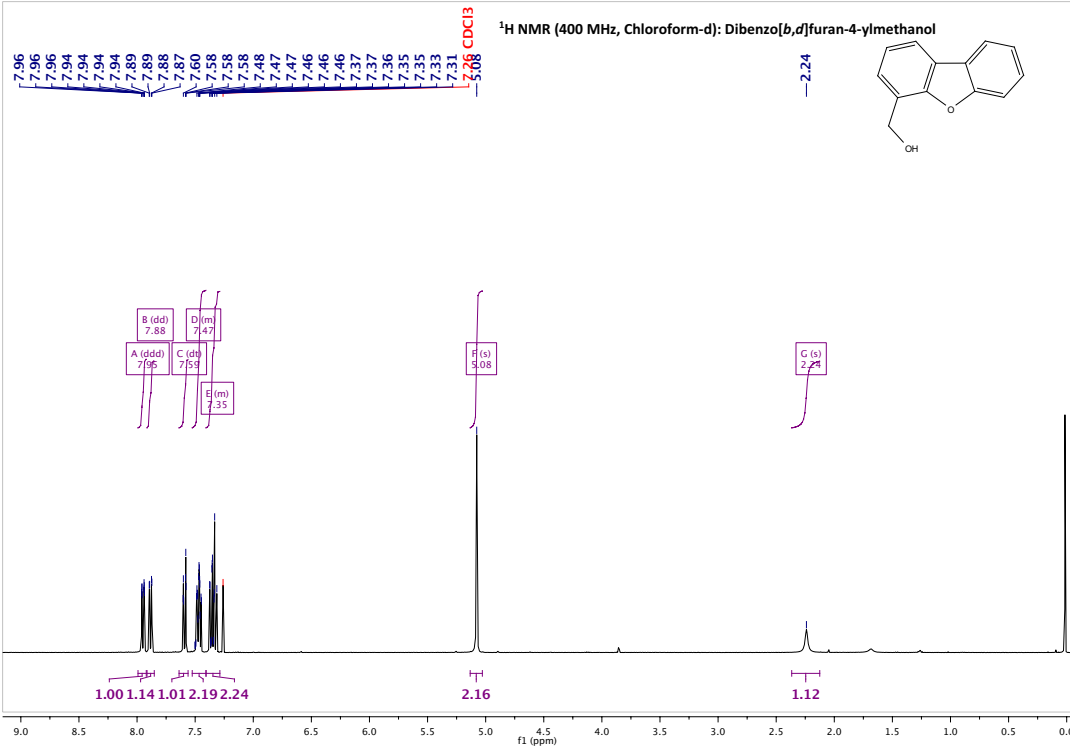

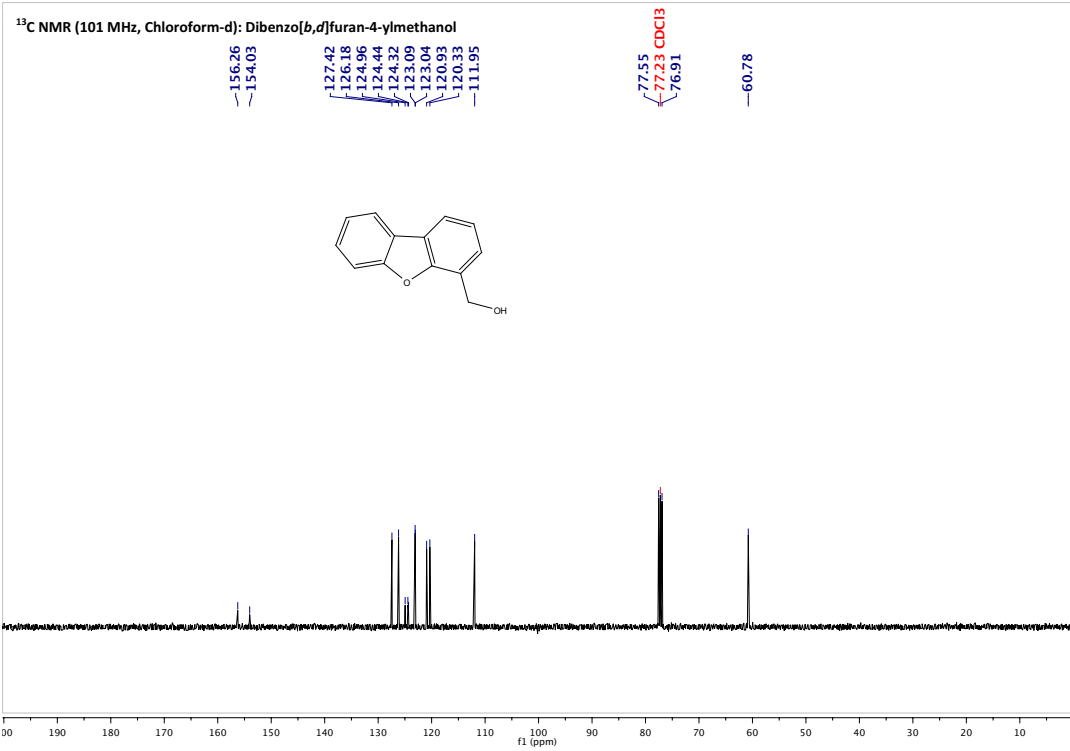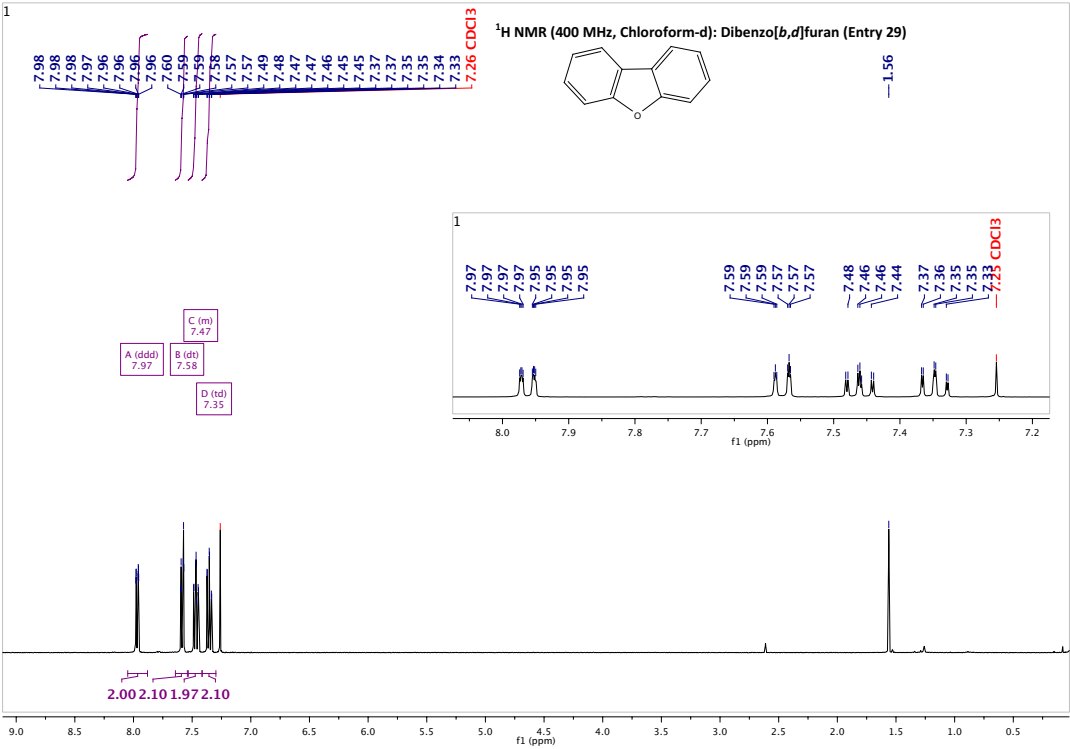

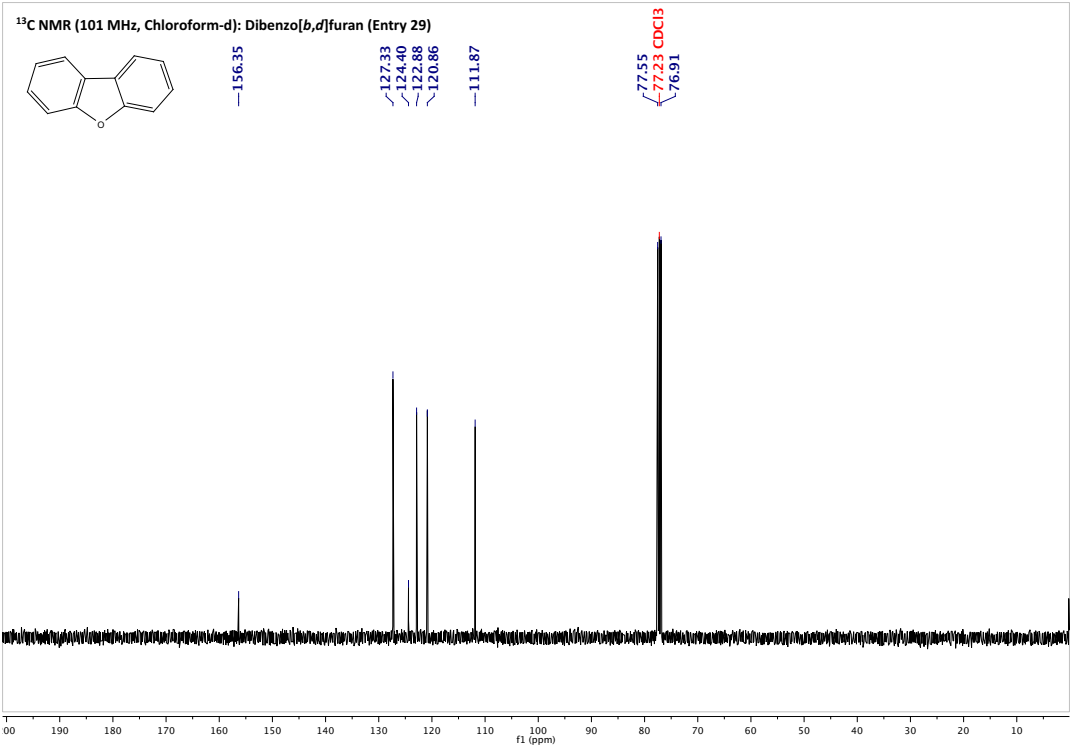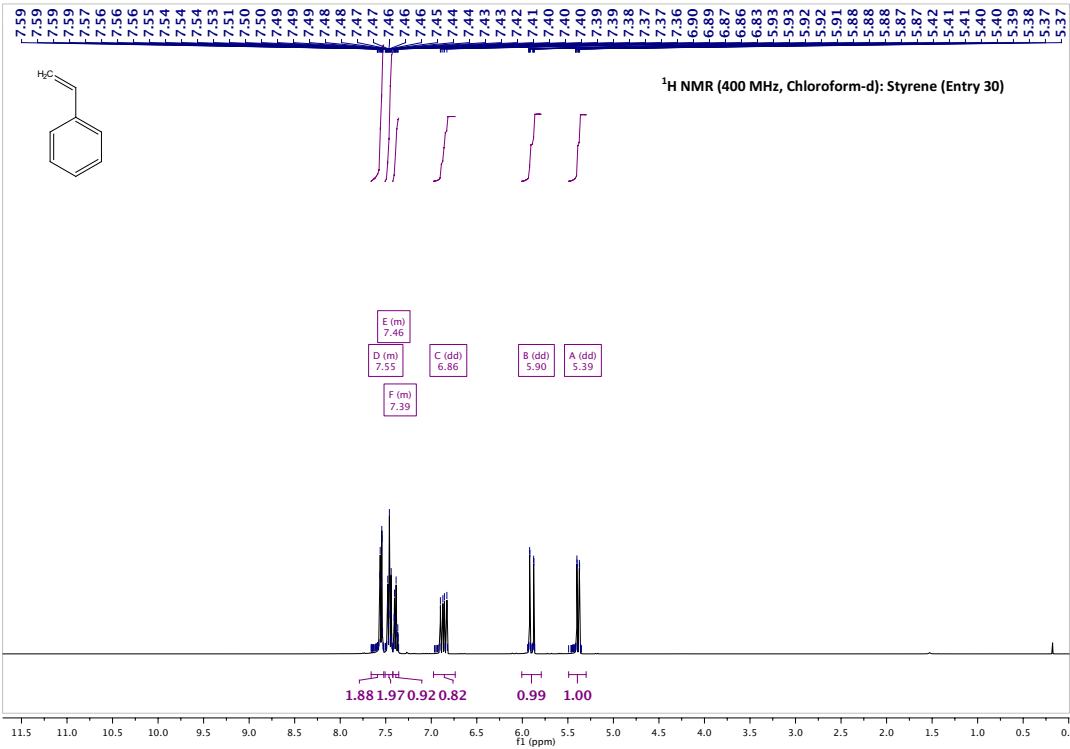

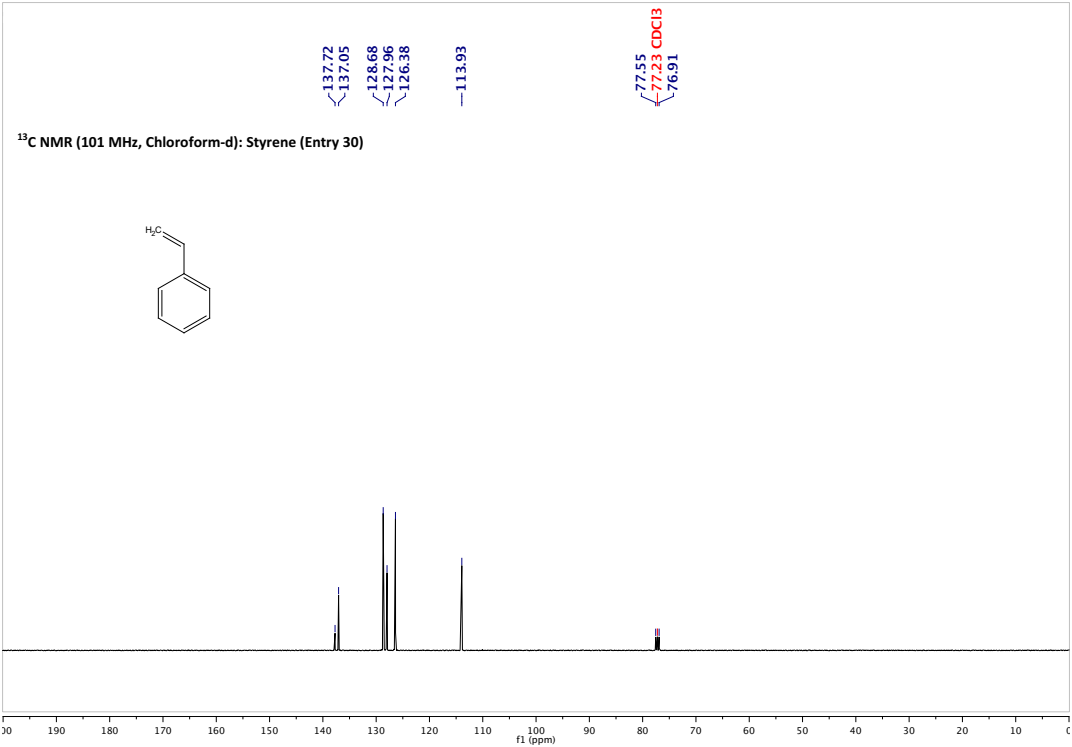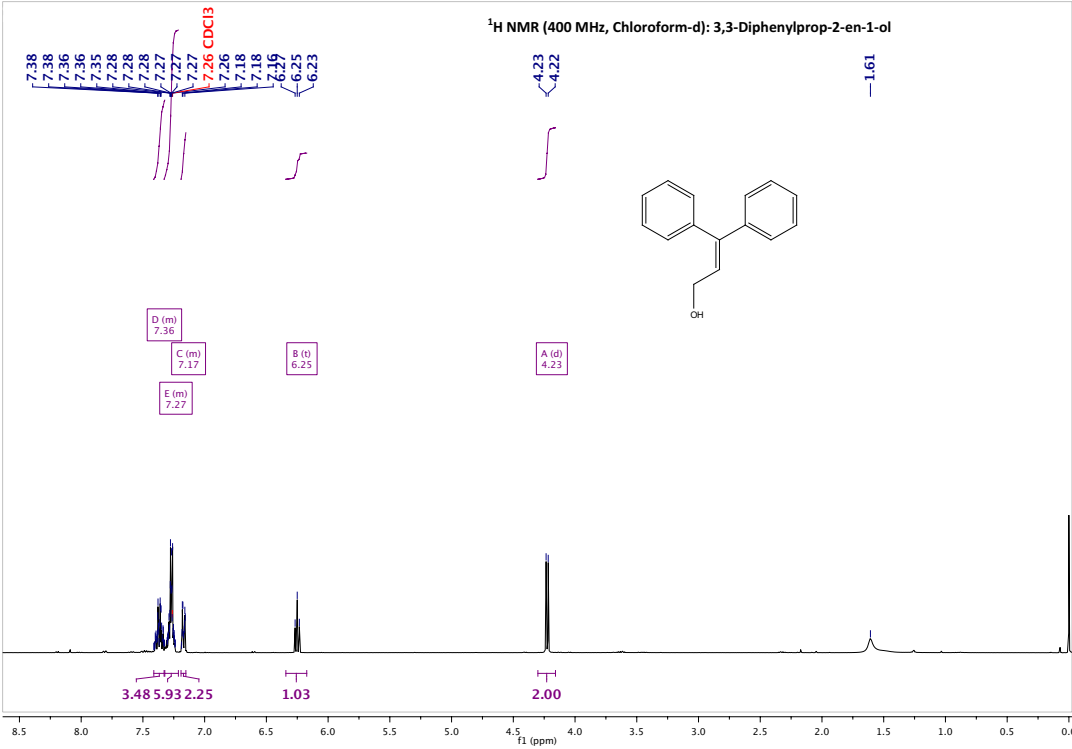

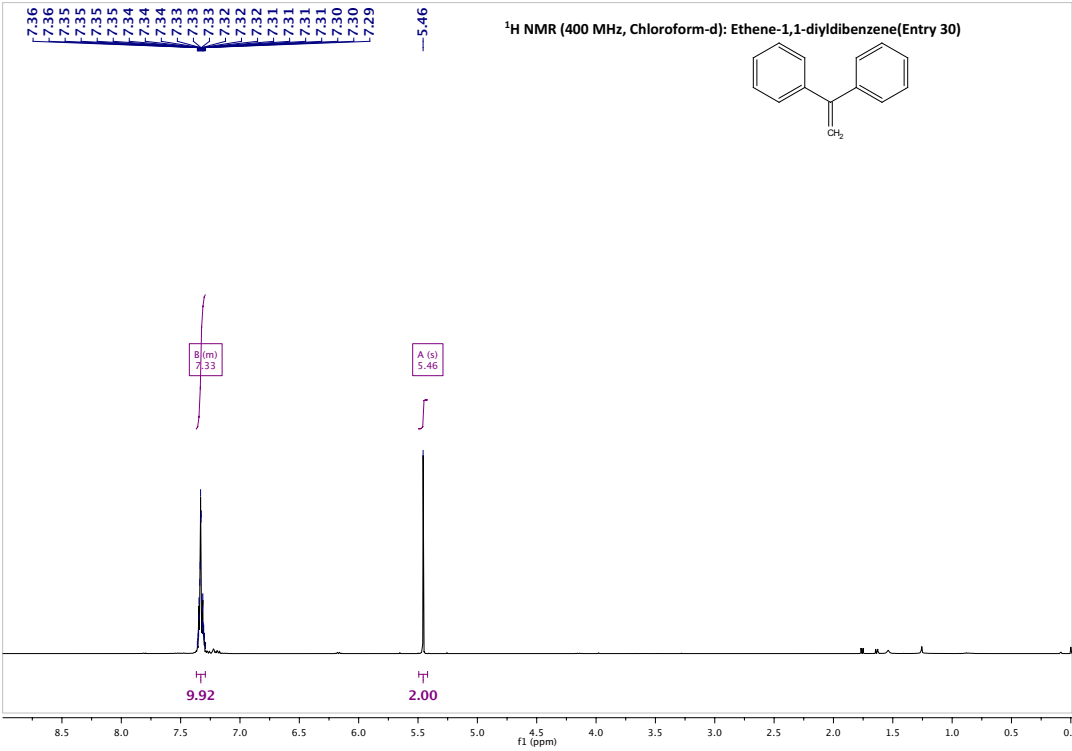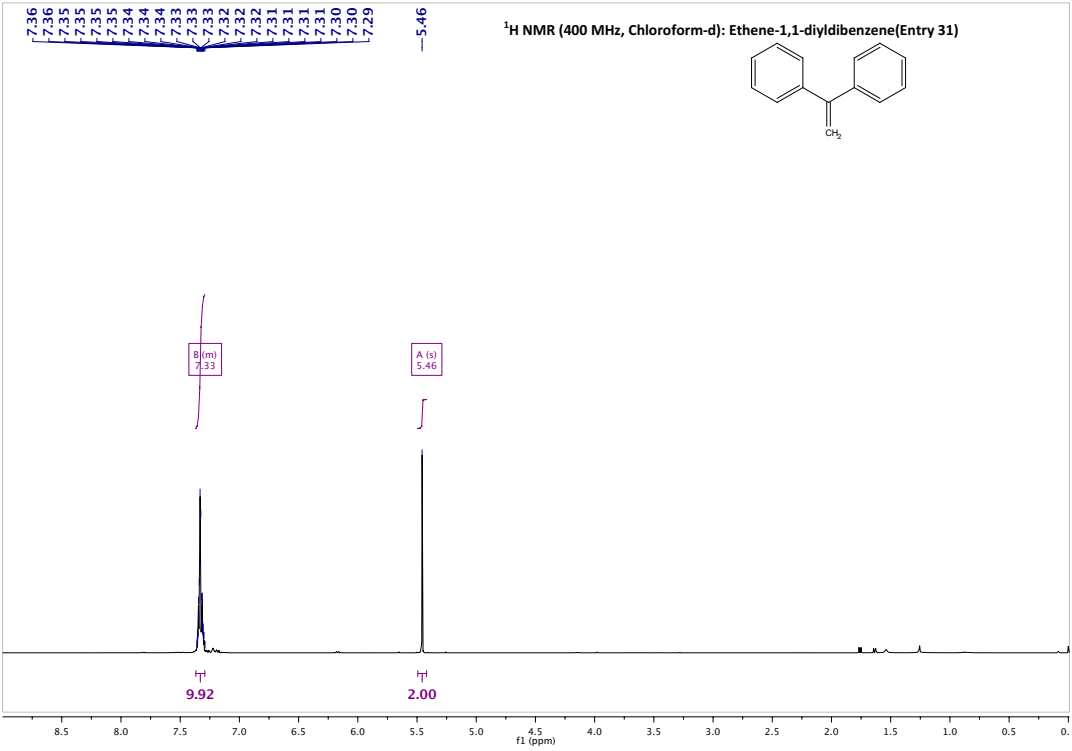



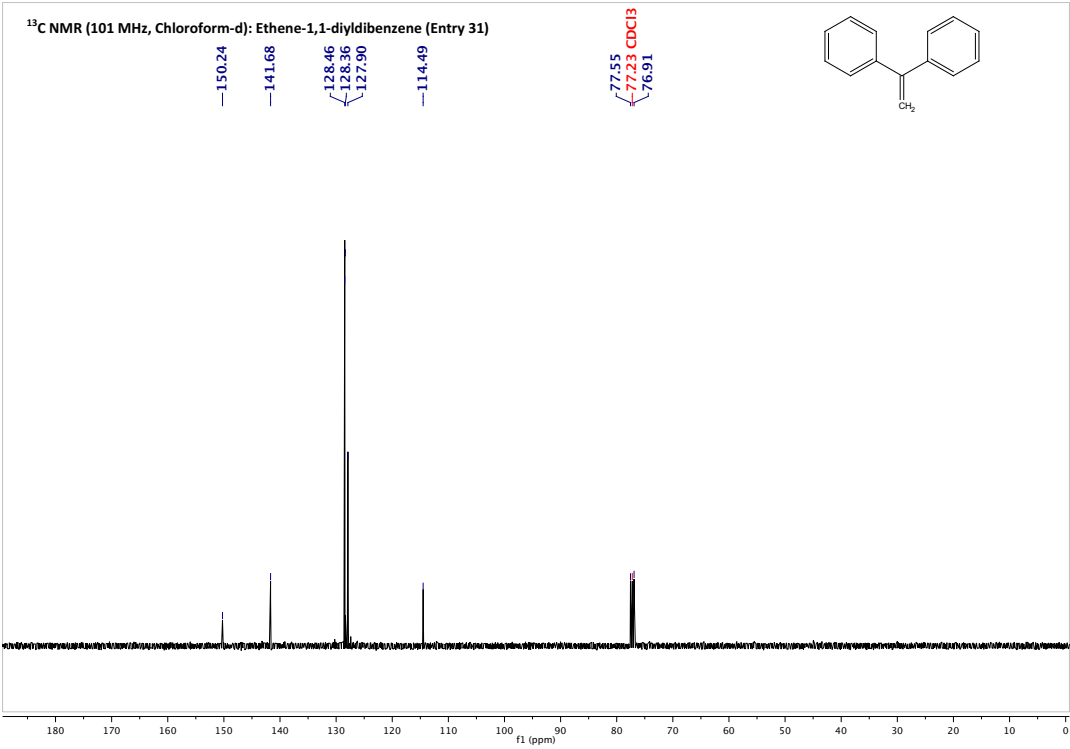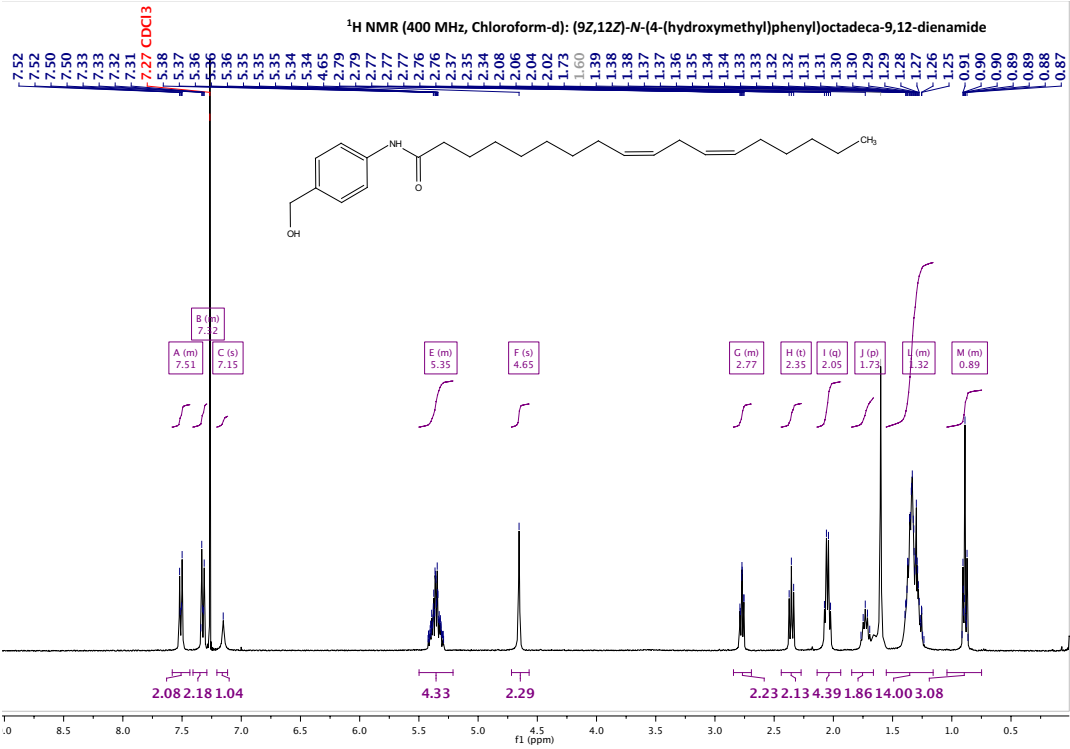

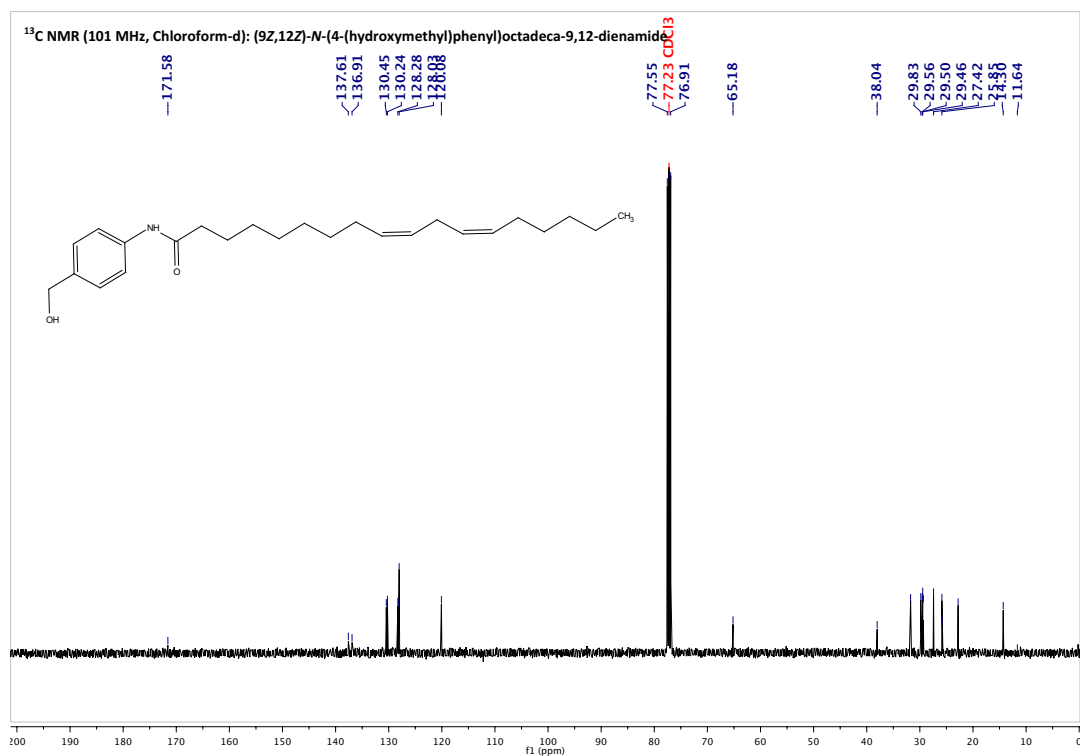

<sup>1</sup>H NMR (400 MHz, Chloroform-d): (9Z,12Z)-N-phenyloctadeca-9,12-dienamide (Entry 34)

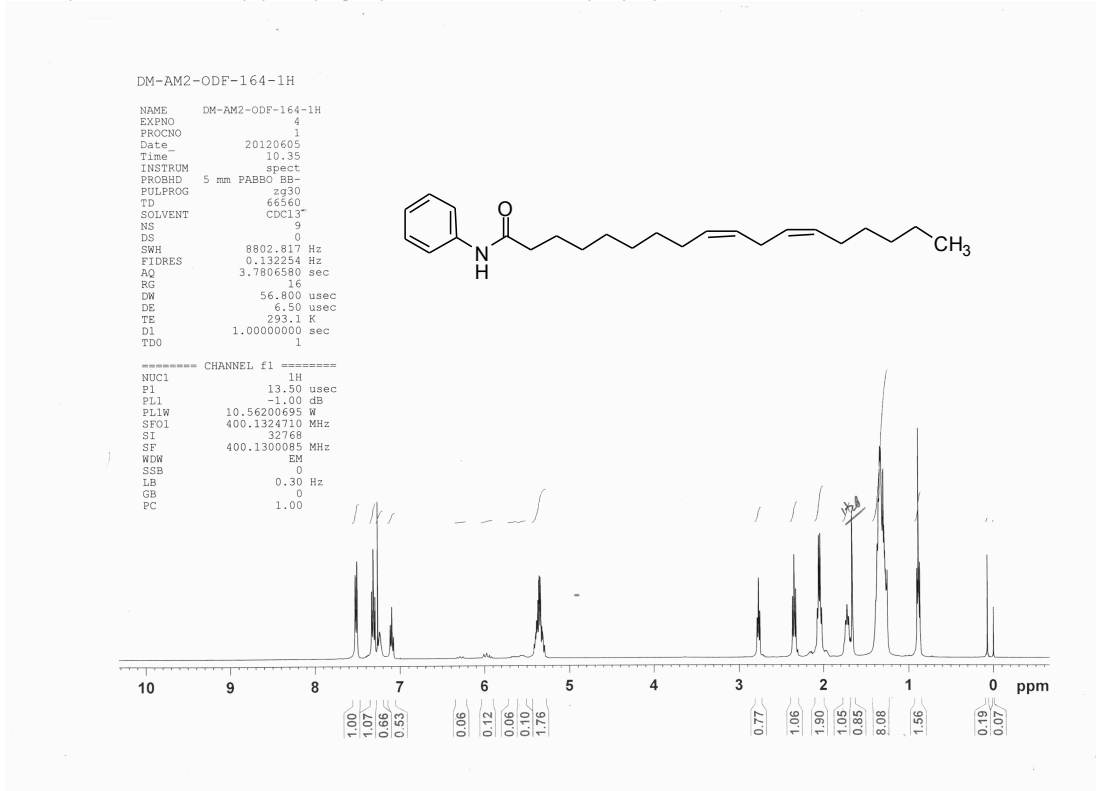

<sup>13</sup>C NMR (101 MHz, Chloroform-d): (9Z,12Z)-N-phenyloctadeca-9,12-dienamide (Entry 33)

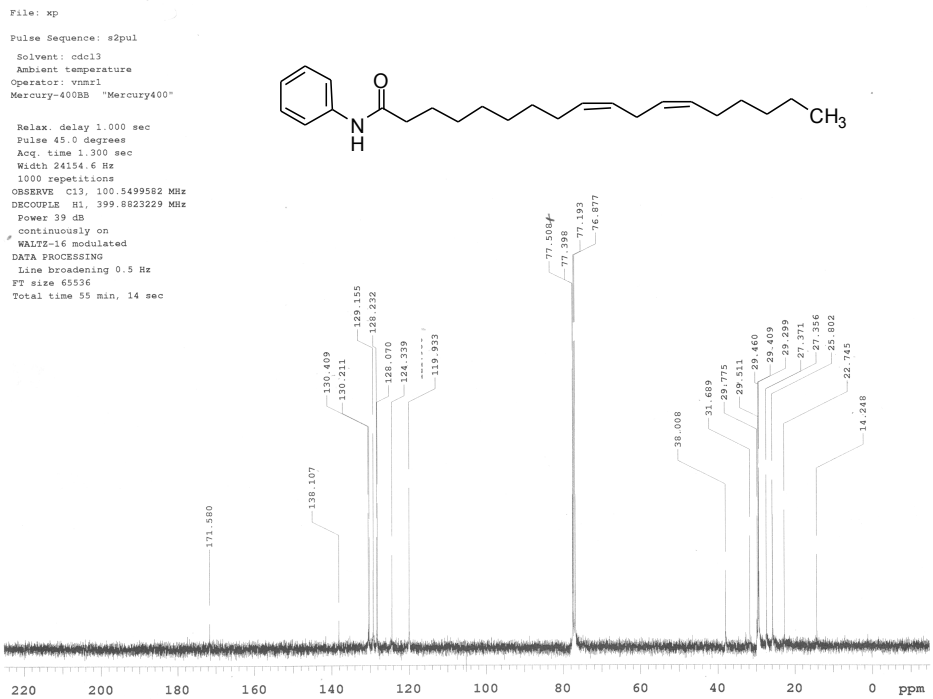

<sup>1</sup>H NMR (400 MHz, Chloroform-d): (4-((R)-2,5,7,8-tetramethyl-2-((4R,8R)-4,8,12-trimethyltridecyl)chroman-6-yloxy)phenyl)methanol

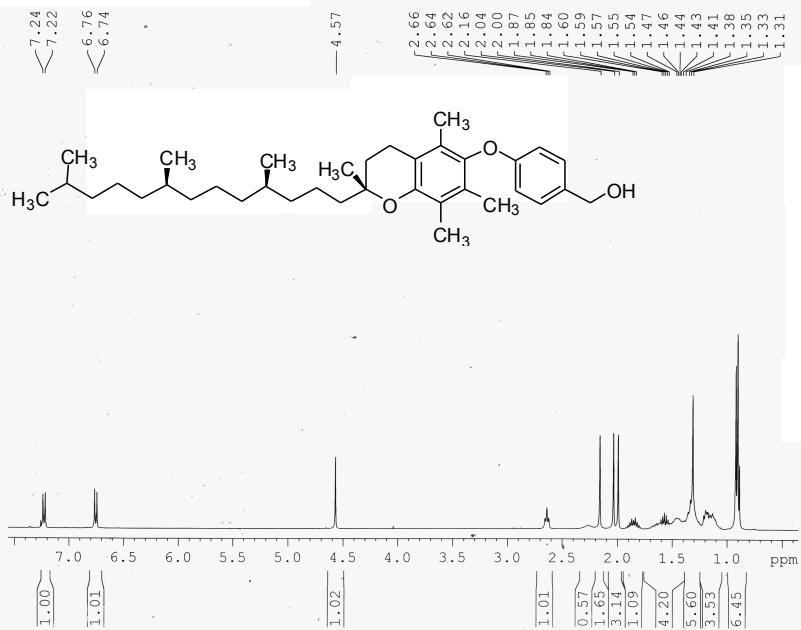

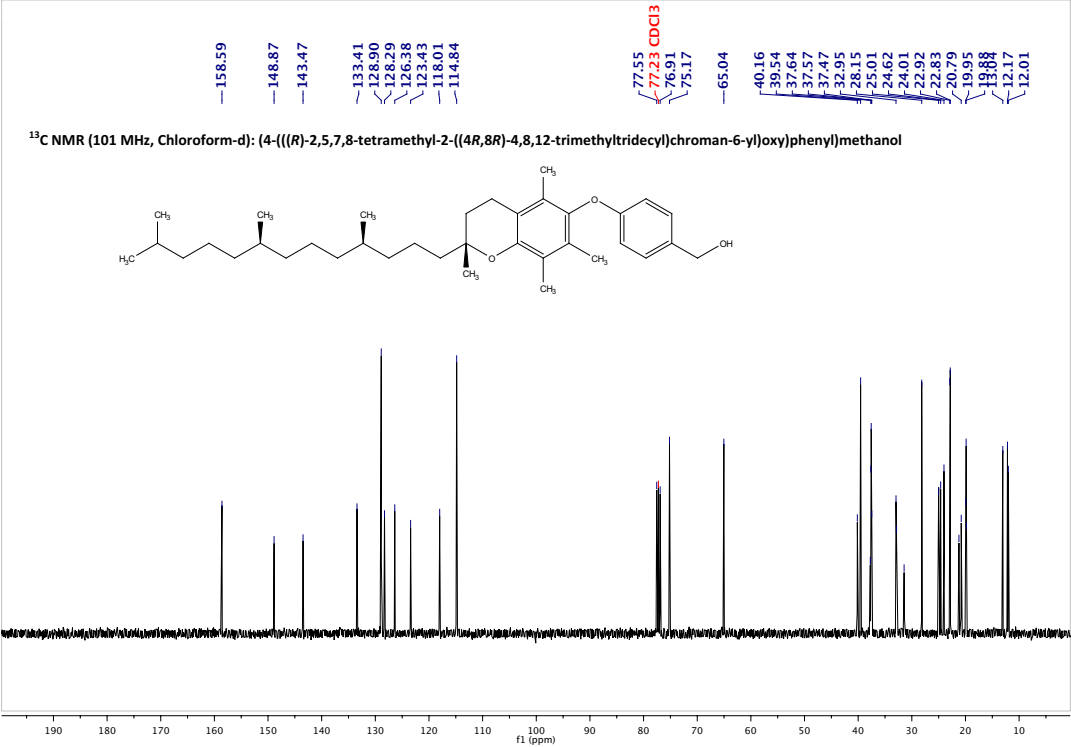

<sup>1</sup>H NMR (400 MHz, Chloroform-d): 4-(((R)-2,5,7,8-Tetramethyl-2-(((4R,8R)-4,8,12-trimethyltridecyl)chroman-6-yl)oxy)benzaldehyde

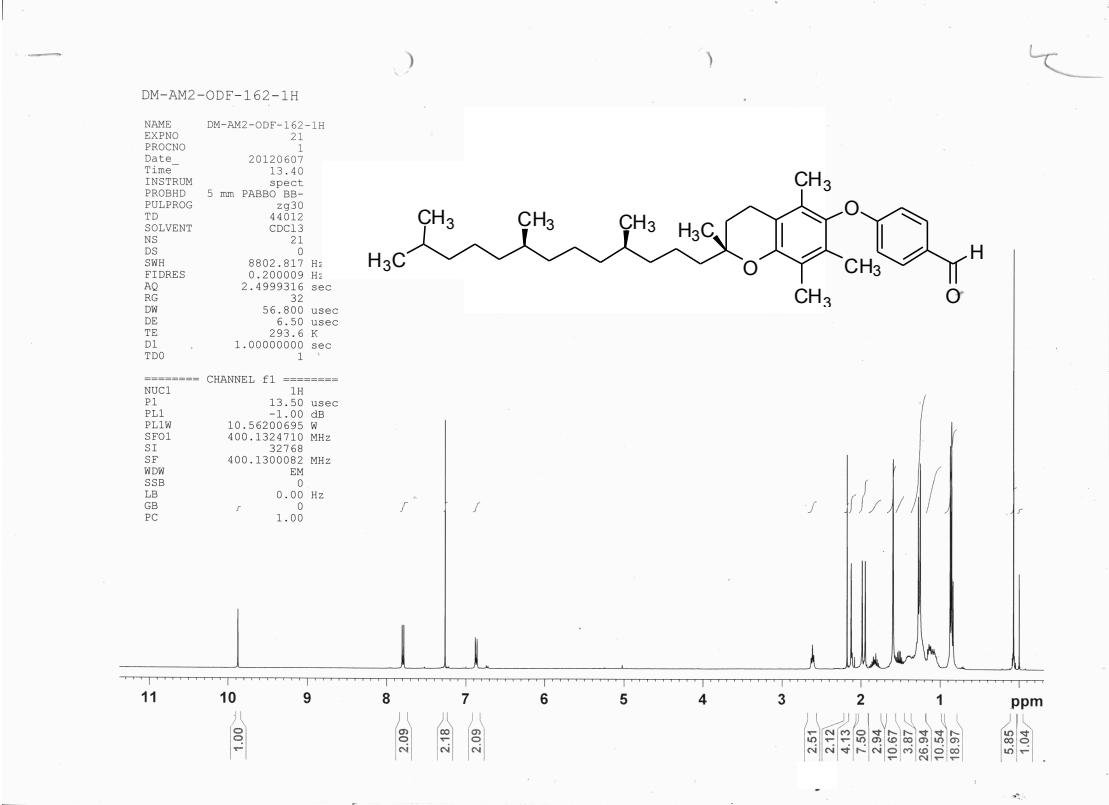

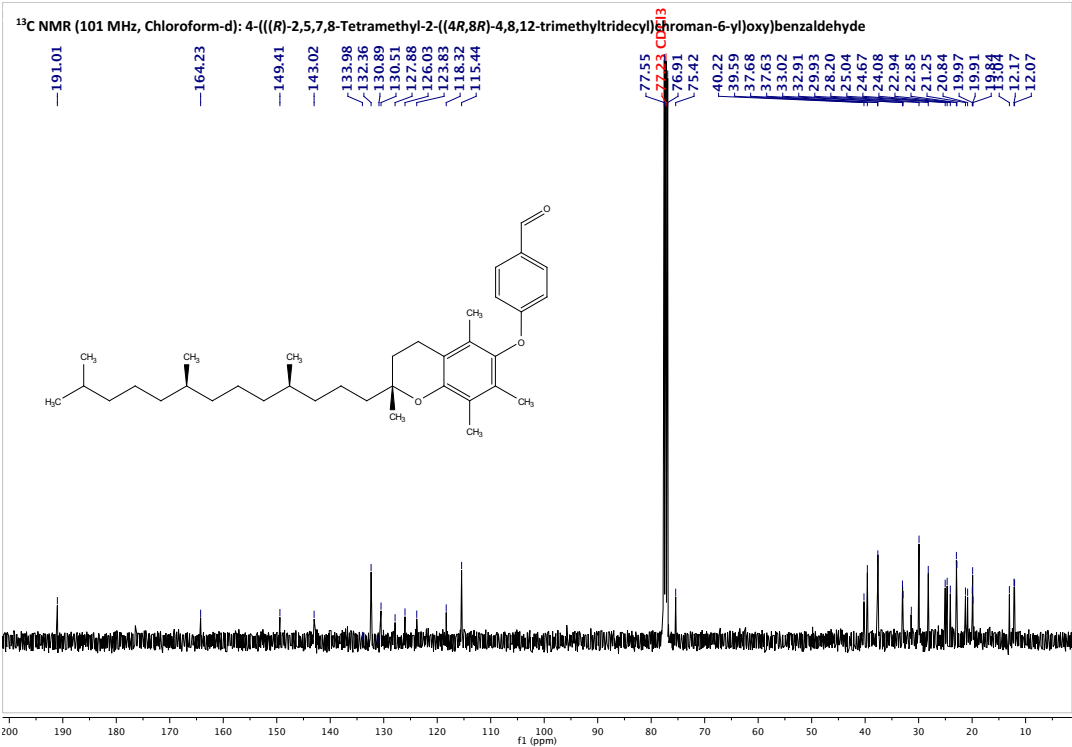

<sup>1</sup>H NMR (400 MHz, Chloroform-d): (R)-2,5,7,8-tetramethyl-6-phenoxy-2-(((4R,8R)-4,8,12-trimethyltridecyl)chroman (Entry 37)

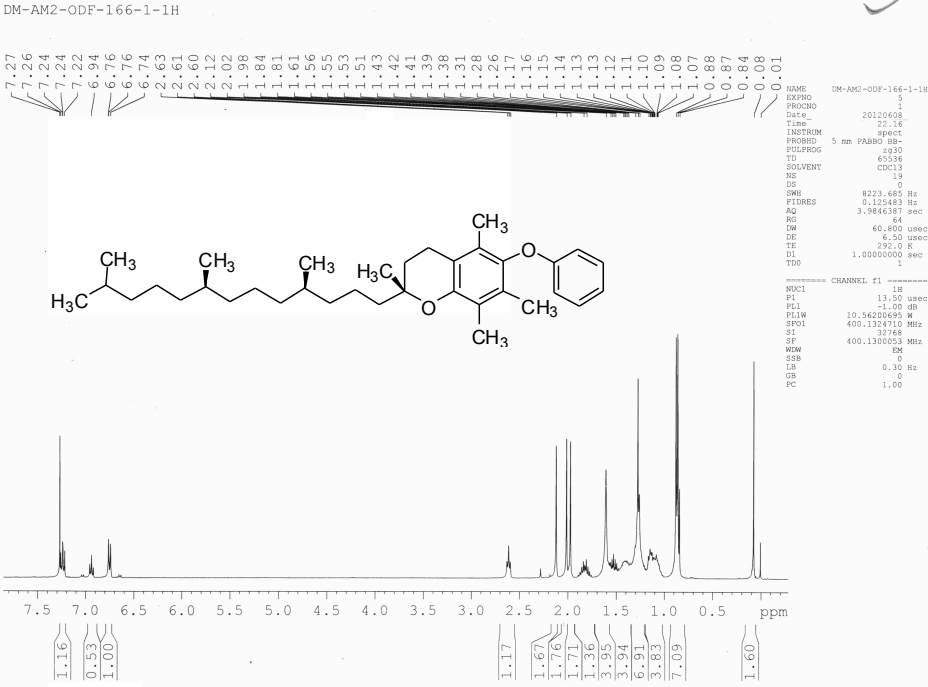

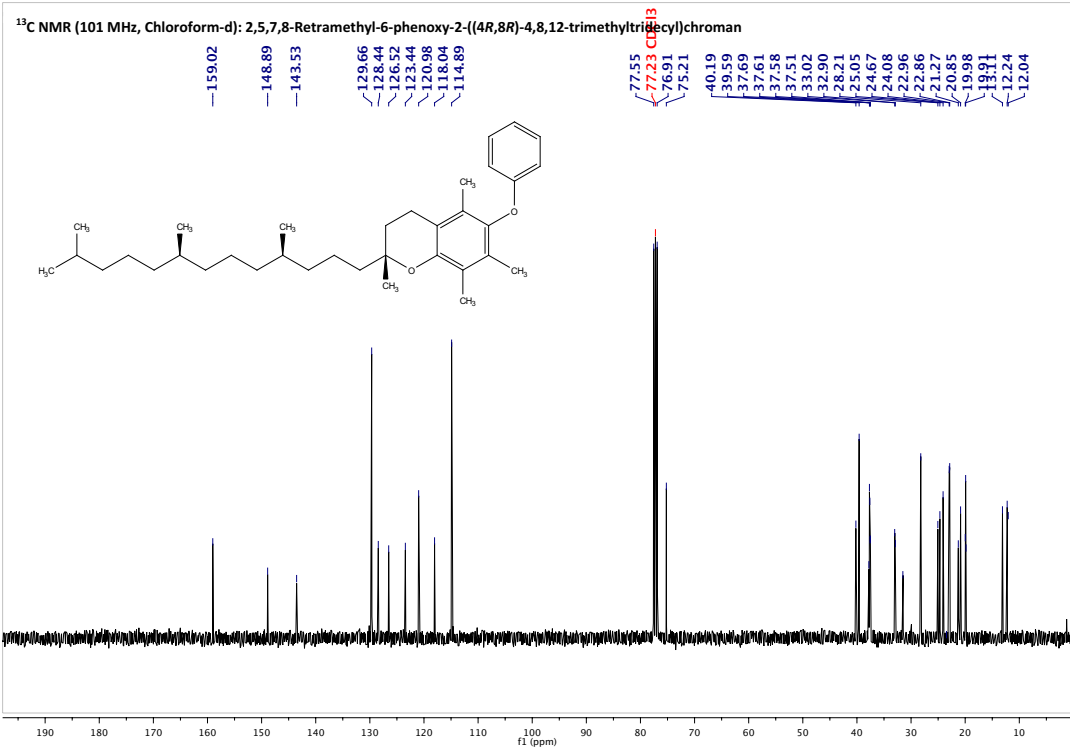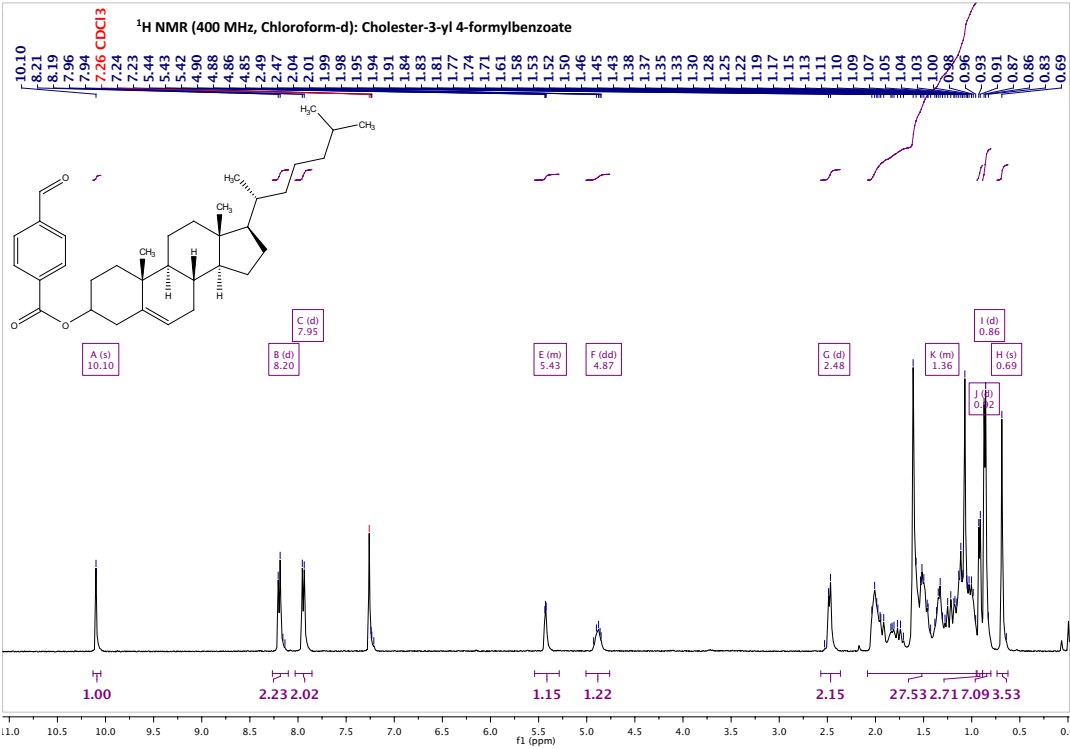

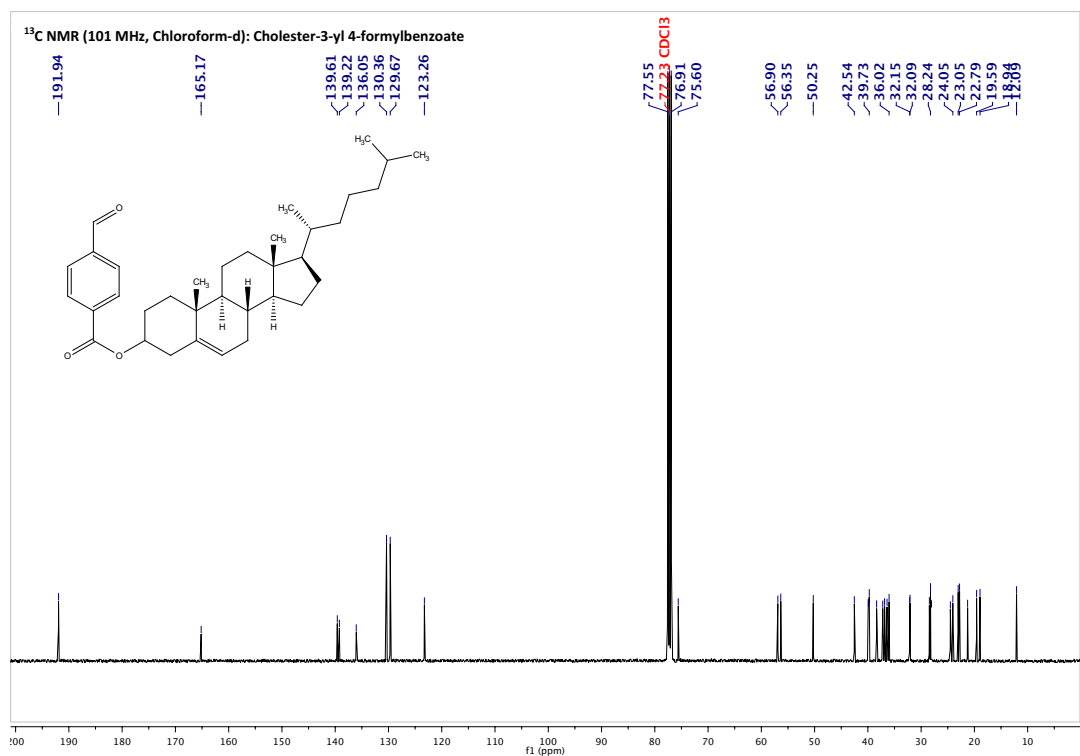

<sup>1</sup>H NMR (400 MHz, Chloroform-d): Cholester-3-yl-4 hydroxymethyl benzoate

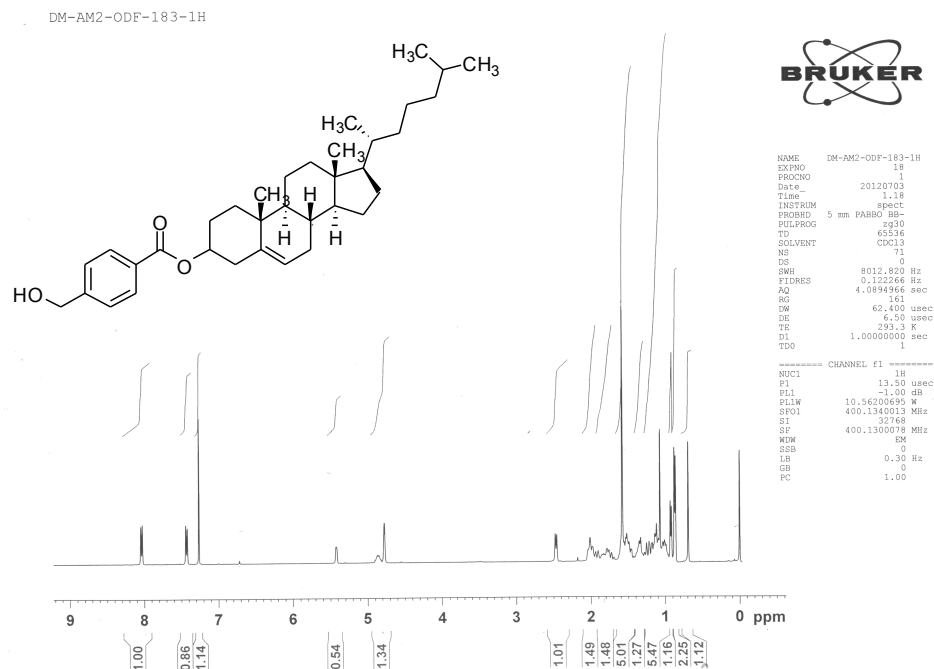

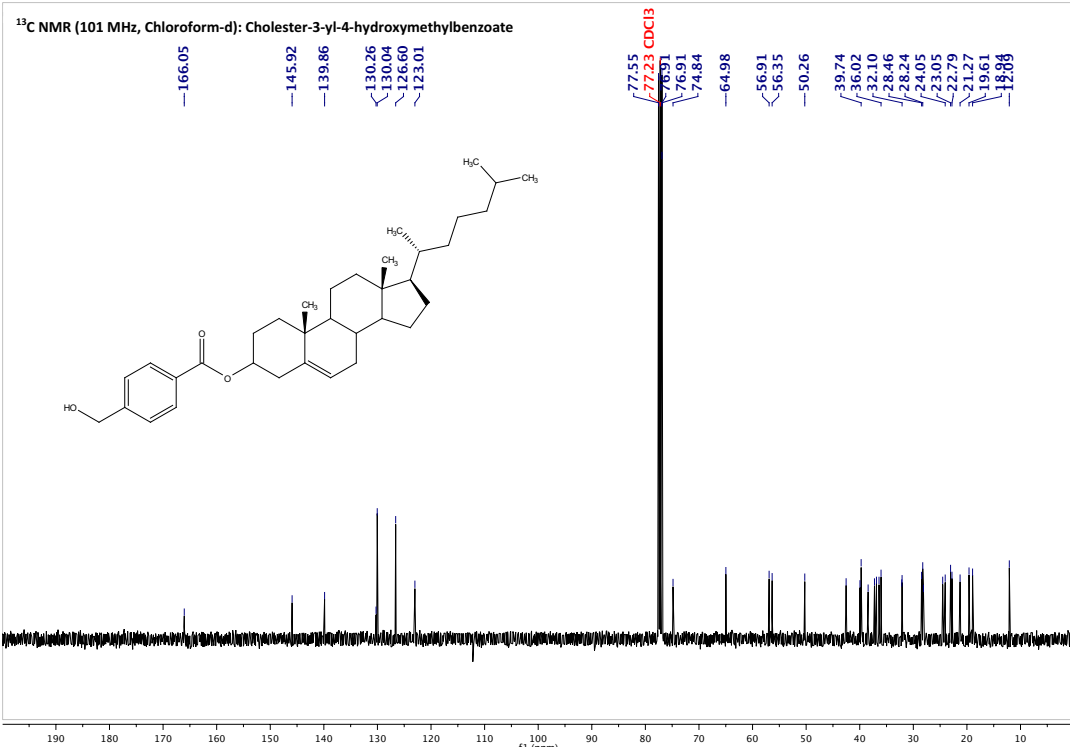

**<sup>1</sup>H NMR (400 MHz, Chloroform-d): Cholester-3-yl-benzoate (Entry 36)**

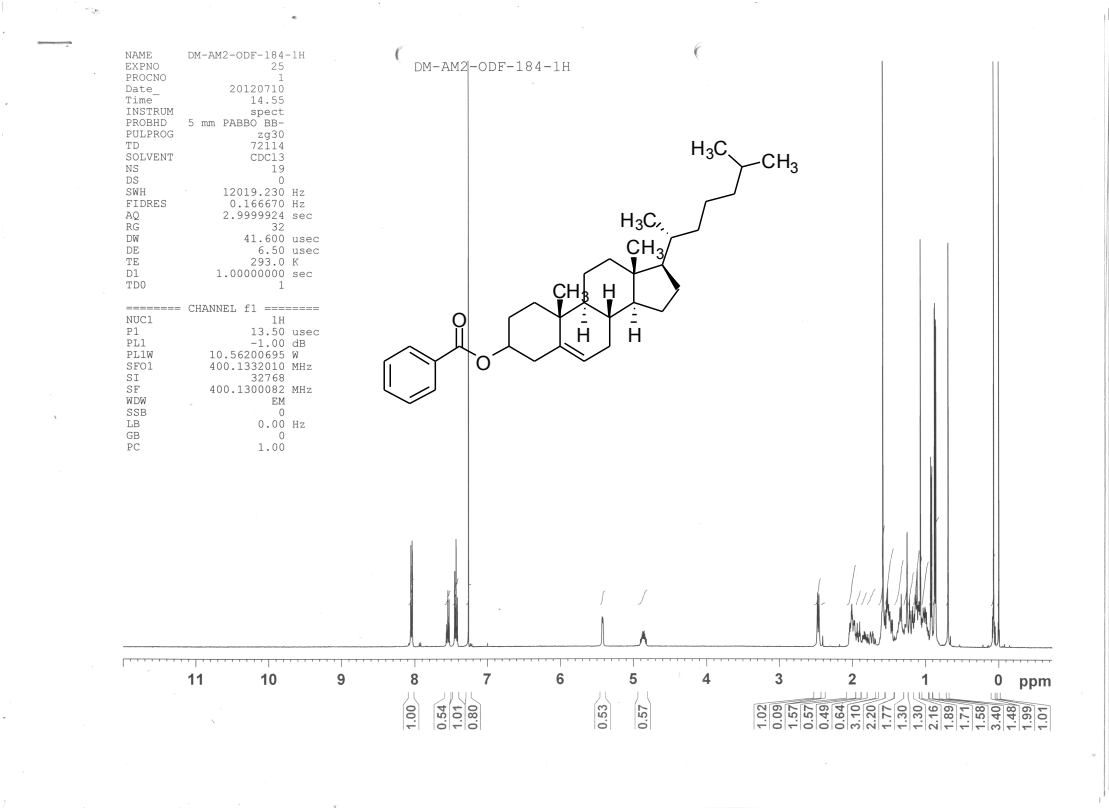



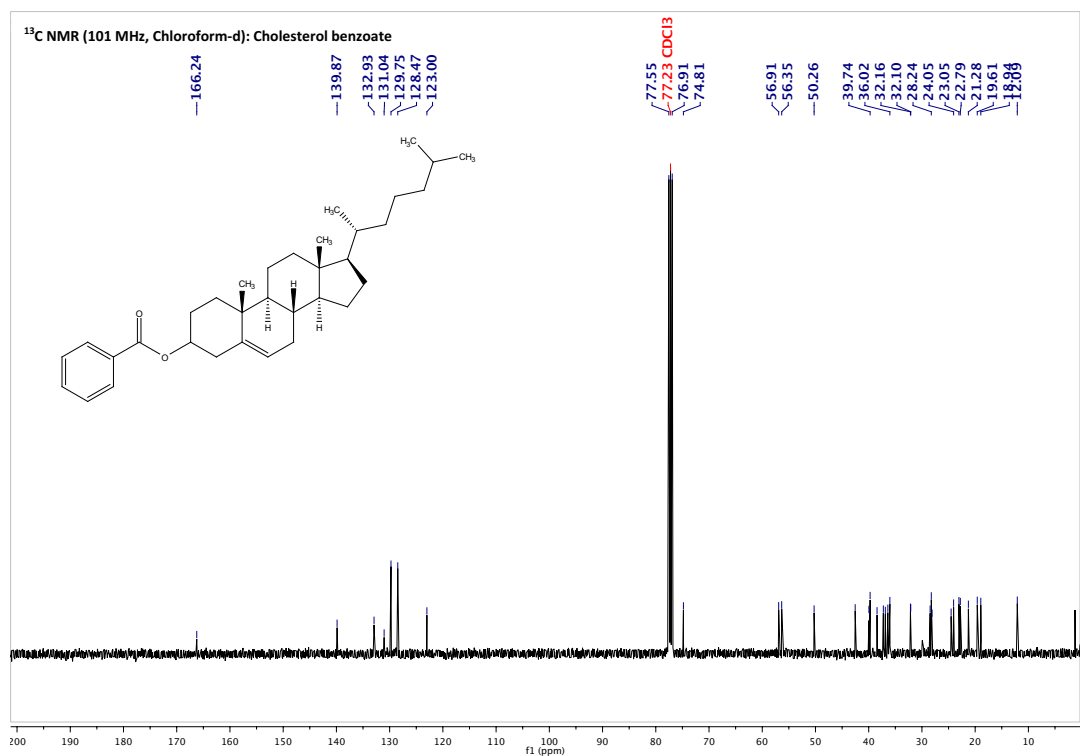

**<sup>1</sup>H NMR (400 MHz, Chloroform-d): 4,6,6-trimethylbicyclo[3.1.1]hept-3-en-2-yl 4-formylbenzoate**

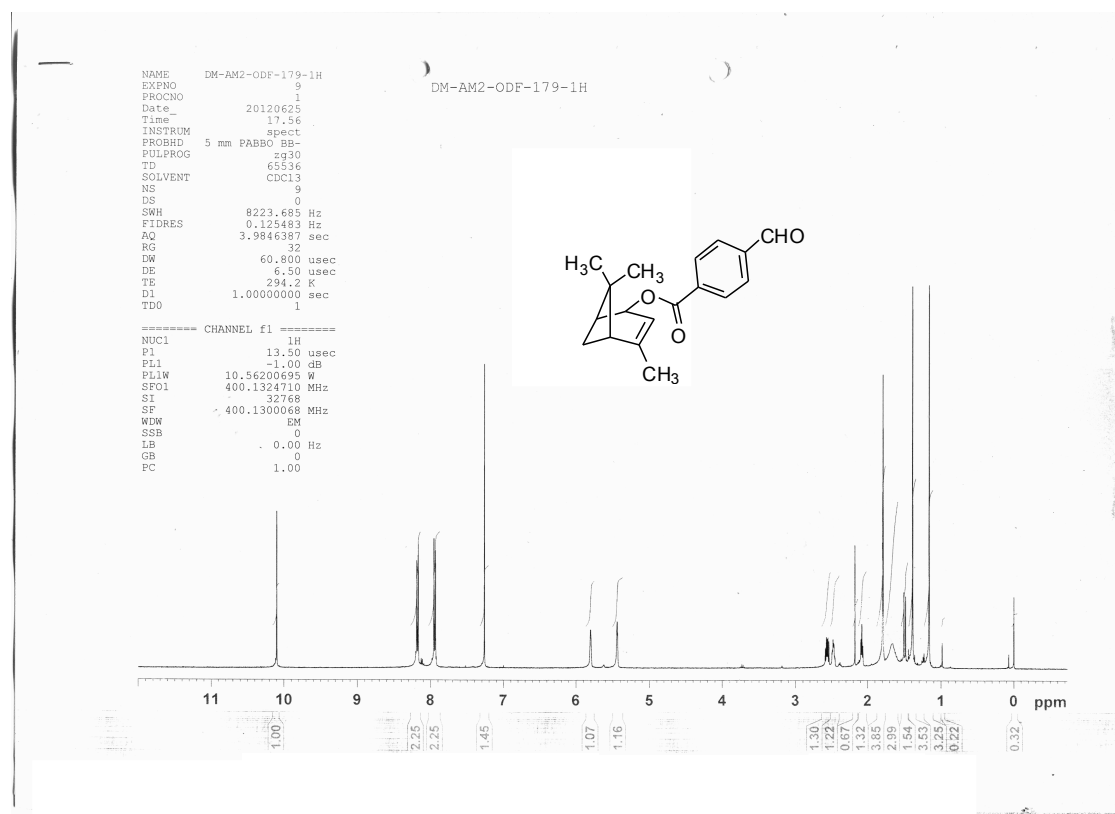

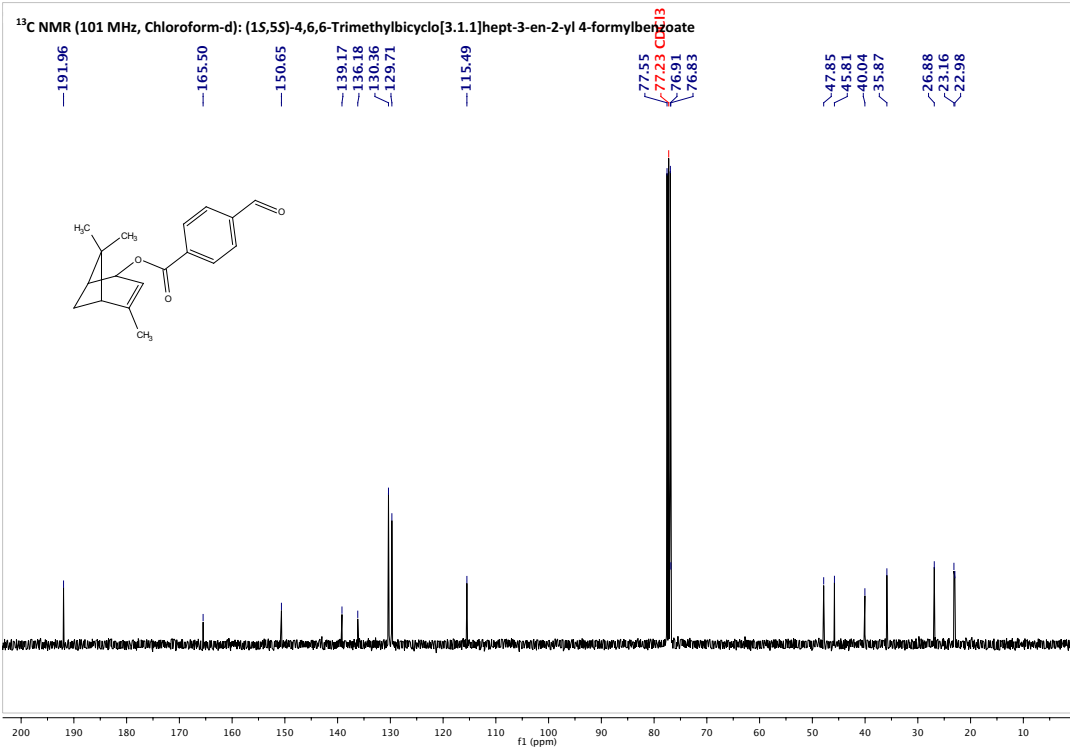

**<sup>1</sup>H NMR (400 MHz, Chloroform-d): 4,6,6-Trimethylbicyclo[3.1.1]hept-3-en-2-yl 4-(hydroxymethyl)benzoate**

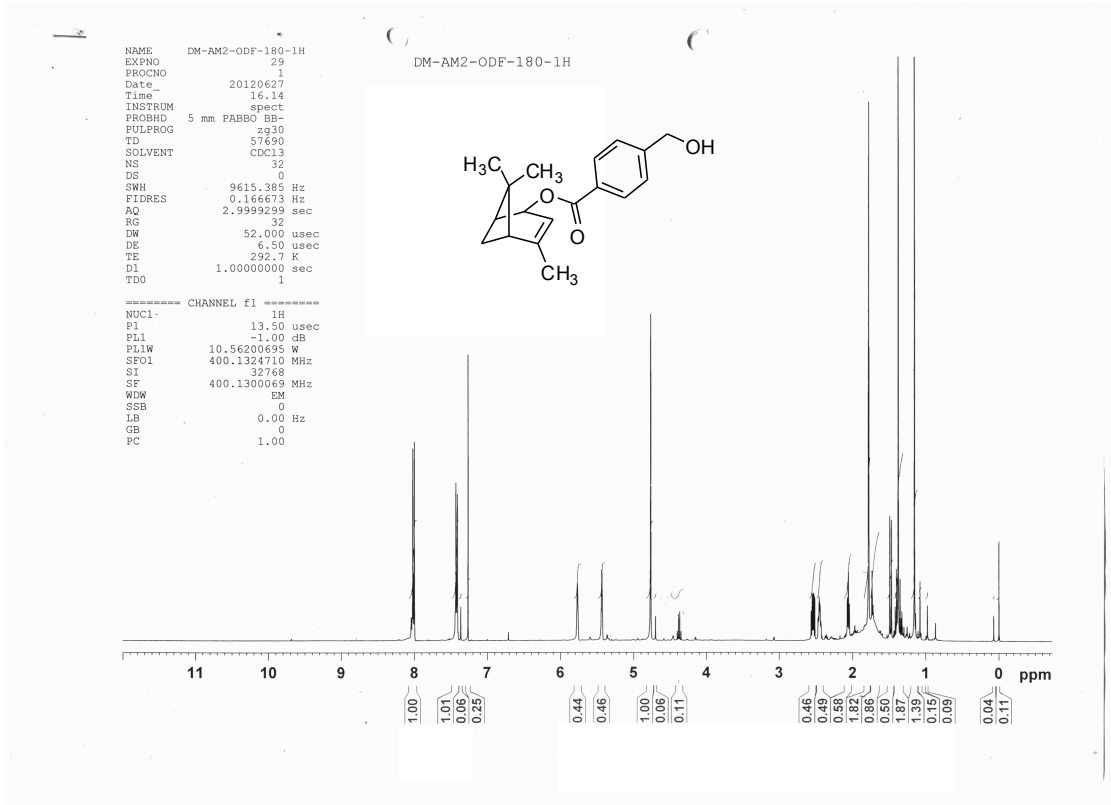

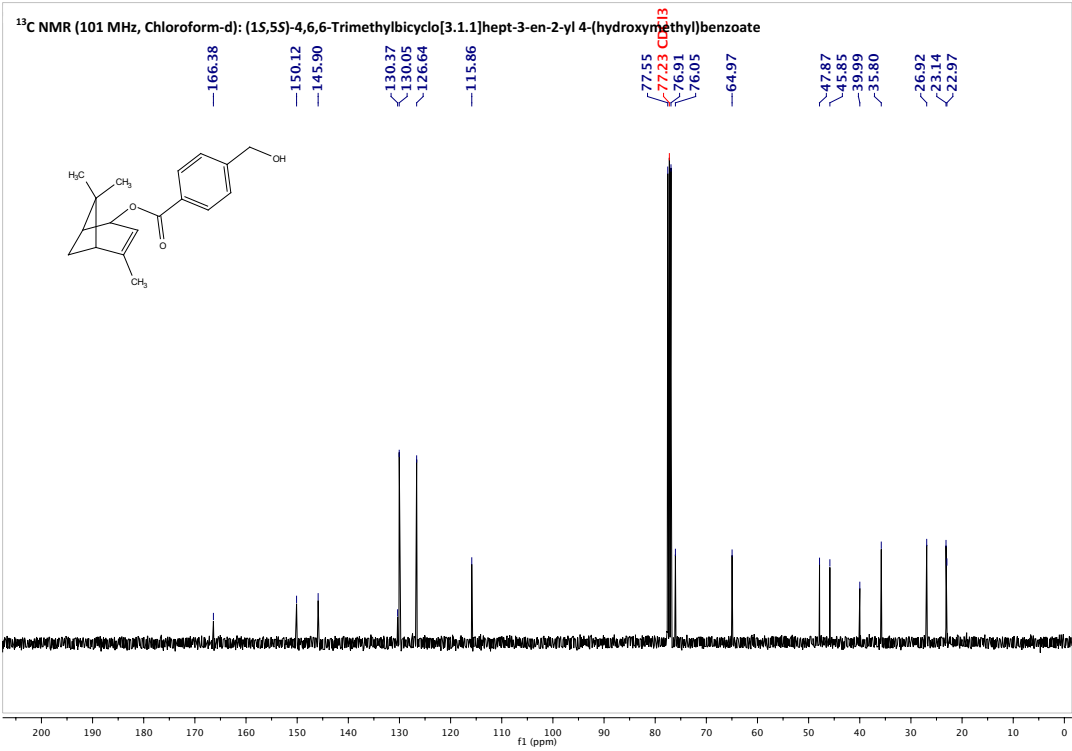

<sup>1</sup>H NMR (400 MHz, Chloroform-d): Verbenol benzoate (Entry 35)

DM-AM2-ODF-181-1H

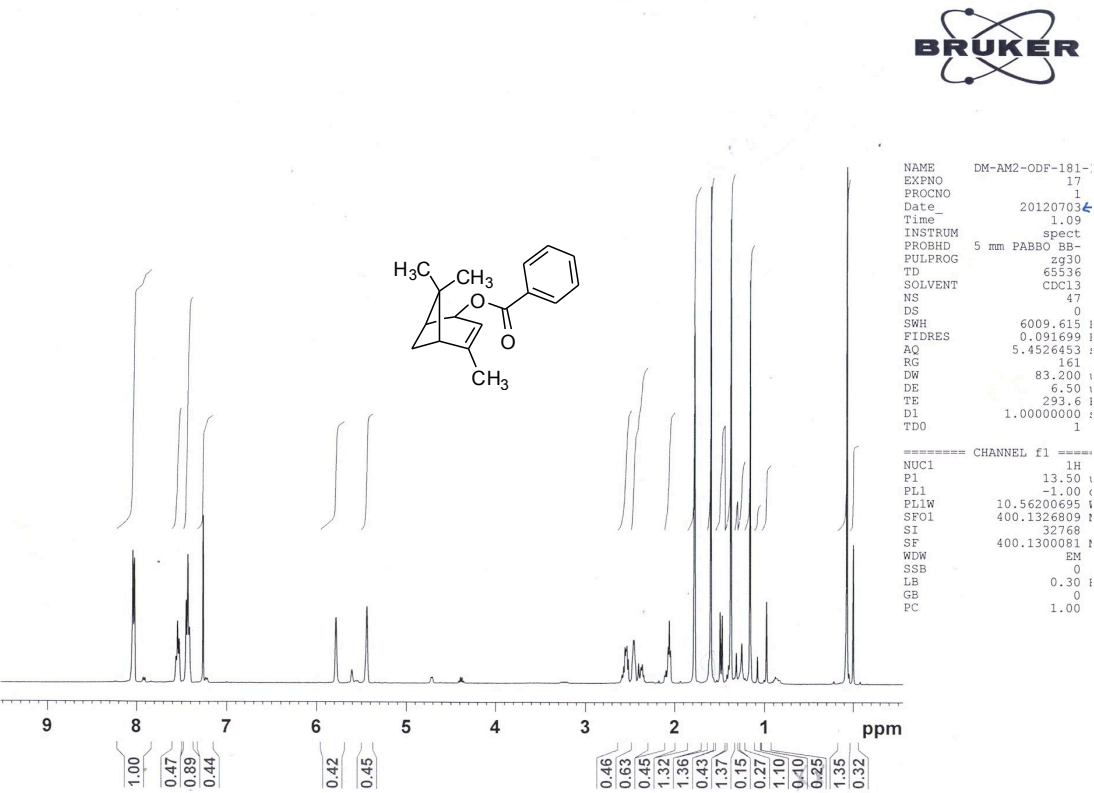

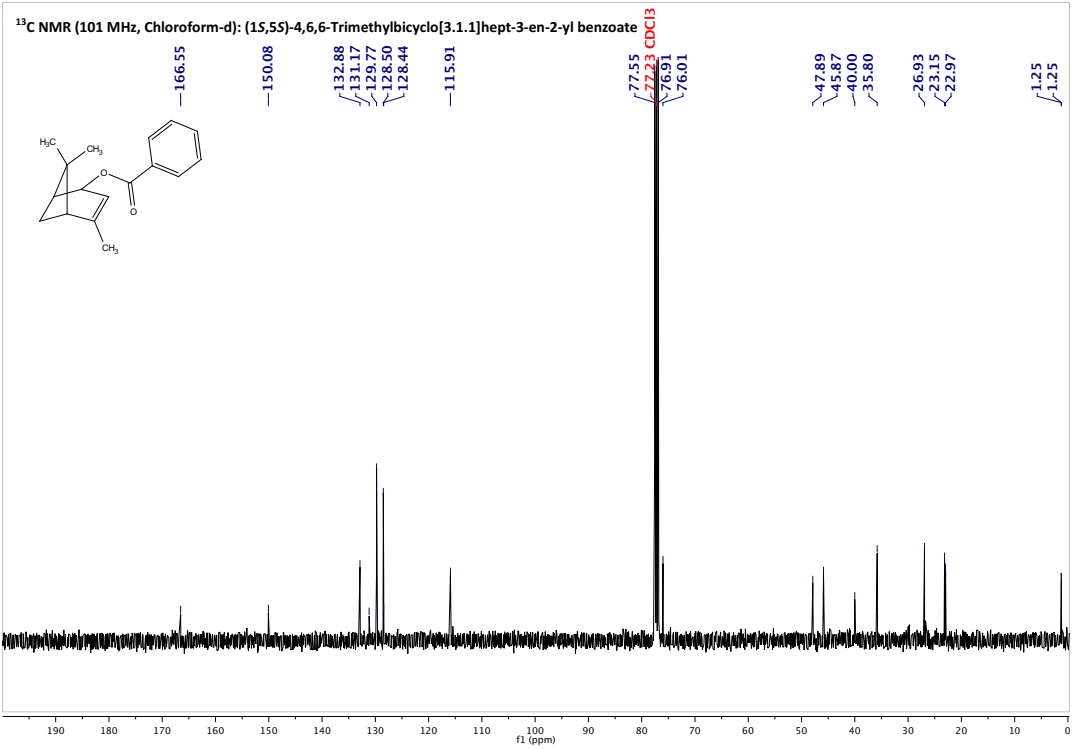

Supplement: c2cc36951f.pdf [file c2cc36951f.pdf]
